# Supplementary material for: Understanding the mechanism and stereoselectivity of NHC-catalyzed [3 + 2] cycloaddition of 3-bromoenals and isatin N-Boc ketimines
Source: Royal Society of Chemistry journal article supplement (doi:10.1039/c8ob02804d), 2018-01-01
Supplement: c8ob02804d1.pdf [file c8ob02804d1.pdf]

*Supporting Information*

**Understanding the mechanism and stereoselectivity of NHC-Catalyzed [3 + 2]  
cycloaddition of 3-bromoaldehydes and isatin N-Boc ketimines**

**Yan Li<sup>\*a</sup>, Zhiqiang Zhang<sup>a</sup>, Changhai Liang<sup>b</sup>**

*<sup>a</sup>School of Chemical Engineering, University of Science and Technology Liaoning,  
Anshan 114051, China*

*<sup>b</sup>School of Petroleum and Chemical Engineering, Dalian University of Technology,  
Panjin, 124221, China.*

***Corresponding person: Yan Li***

***E-mail: snow2007liyan@163.com***

***Telephone: +86-18741219506***

***Fax: 86-412-5929627***

Table S1. Single-point energies (in kcal/mol) at SMD(toluene)/M06-2X/6-311++G(d,p) level, based on the optimized geometries at different levels of theory.

| Species   | M06-2X/<br>6-31G(d,p) | B3LYP-D3/<br>6-31G(d,p) | M06-2X-D3/<br>6-31G(d,p) |
|-----------|-----------------------|-------------------------|--------------------------|
| R1+R2+Cat | 0.0                   | 0.0                     | 0.0                      |
| TS3(RR)   | 12.0                  | 11.0                    | 12.6                     |
| TS3(RS)   | 13.5                  | 10.4                    | 13.9                     |
| TS3(SR)   | 10.9                  | 9.1                     | 11.0                     |
| TS3(SS)   | 7.2                   | 6.0                     | 7.4                      |

Table S2. Comparison of the Gibbs free energies (a.u.) of the stereoselective transition states.

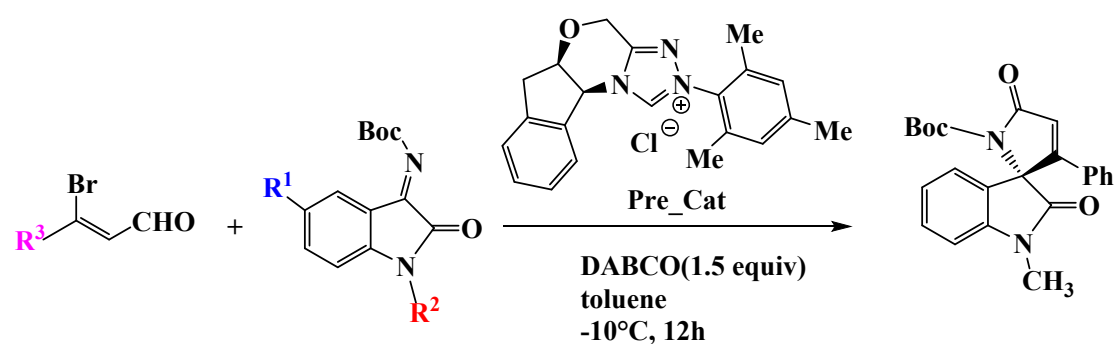

| Entry | $R^1$             | $R^2$           | $R^3$                                           | TS3(SS)      | TS3(SR)      | $\Delta\Delta G(\text{kcal/mol})$ |
|-------|-------------------|-----------------|-------------------------------------------------|--------------|--------------|-----------------------------------|
| 1     | 5-CH <sub>3</sub> | CH <sub>3</sub> | Ph                                              | -4847.627188 | -4847.620725 | 4.1                               |
| 2     | 5-Cl              | CH <sub>3</sub> | Ph                                              | -5267.959831 | -5267.954738 | 3.2                               |
| 3     | H                 | Ac              | Ph                                              | -4921.675193 | -4921.67258  | 1.6                               |
| 4     | H                 | H               | Ph                                              | -4769.070085 | -4769.064543 | 3.5                               |
| 5     | H                 | CH <sub>3</sub> | 4-FC <sub>6</sub> H <sub>4</sub>                | -4907.597463 | -4907.591953 | 3.5                               |
| 6     | H                 | CH <sub>3</sub> | 4-MeC <sub>6</sub> H <sub>4</sub>               | -4847.627247 | -4847.622047 | 3.3                               |
| 7     | H                 | CH <sub>3</sub> | 4-MeOC <sub>6</sub> H <sub>4</sub>              | -4922.829649 | -4922.821918 | 4.9                               |
| 8     | H                 | CH <sub>3</sub> | 4-NO <sub>2</sub> C <sub>6</sub> H <sub>4</sub> | -5012.842624 | -5012.836462 | 3.9                               |

We have examined the dependence of substrate on the stereoselectivity by considering a series of substrates with different substituent groups (3-aryl-3-bromoaldehydes and isatin N-Boc ketimines). As depicted in Table S2, the energy differences between **TS3(SS)** and **TS3(SR)**, associated with the S- and R- configured products respectively, are close to the range of 1.5 ~ 2.9 kcal/mol (which can be obtained from the experimentally reported *ee* values with the range of 86% ~ 99%).

These results demonstrate that the stereoselectivity can be explained by our calculated results.

Table S3. Total (a.u.) and relative free energies in parentheses (kcal/mol) of the reactant, intermediates, transition states and products at SMD(toluene)/M06-2X/6-311++G(d,p) level.

| species                    | Gsol         | $\Delta G$ | species        | Gsol         | $\Delta G$ |
|----------------------------|--------------|------------|----------------|--------------|------------|
| <b>R1+R2+Cat</b>           | -4048.220044 | 0.0        | <b>TS4(SR)</b> | -4808.379273 | -13.4      |
| <b>Re-TS1</b>              | -4808.329748 | 17.6       | <b>TS4(SS)</b> | -4808.389557 | -19.9      |
| <b>Re-IM1</b>              | -4048.198507 | 13.5       | <b>IM4(RR)</b> | -4808.393042 | -22.1      |
| <b>Si-TS1</b>              | -4808.273679 | 52.8       | <b>IM4(RS)</b> | -4808.412573 | -34.3      |
| <b>Si-IM1</b>              | -4808.330791 | 17.0       | <b>IM4(SR)</b> | -4808.401411 | -27.3      |
| <b>Re-TS2</b>              | -4808.326804 | 19.5       | <b>IM4(SS)</b> | -4808.402446 | -28.0      |
| <b>Re-TS2<sub>d</sub></b>  | -4808.300279 | 36.1       | <b>TS5(RR)</b> | -4808.344694 | 8.3        |
| <b>Re-TS2<sub>w</sub></b>  | -4808.311375 | 29.2       | <b>TS5(RS)</b> | -4808.379835 | -13.8      |
| <b>Re-TS2<sub>2w</sub></b> | -4808.323971 | 21.3       | <b>TS5(SS)</b> | -4808.381584 | -14.9      |
| <b>Re-IM2</b>              | -4808.336309 | 13.5       | <b>IM5(RR)</b> | -4808.389005 | -19.6      |
| <b>TS3-RR</b>              | -4808.338667 | 12.0       | <b>IM5(RS)</b> | -4808.400983 | -27.1      |
| <b>TS3(RS)</b>             | -4808.336397 | 13.5       | <b>IM5(SR)</b> | -4808.393561 | -22.4      |
| <b>TS3(SR)</b>             | -4808.340517 | 10.9       | <b>IM5(SS)</b> | -4808.400998 | -27.1      |
| <b>TS3(SS)</b>             | -4808.346403 | 7.2        | <b>TS6(RR)</b> | -4808.383542 | -16.1      |
| <b>IM3(RR)</b>             | -4808.396719 | -24.4      | <b>TS6(RS)</b> | -4808.38942  | -19.8      |
| <b>IM3(RS)</b>             | -4808.391609 | -21.2      | <b>TS6(SR)</b> | -4808.38268  | -15.6      |
| <b>IM3(SR)</b>             | -4808.392298 | -21.6      | <b>TS6(SS)</b> | -4808.386567 | -18.0      |
| <b>IM3(SS)</b>             | -4808.394903 | -23.3      | <b>P(R)</b>    | -4808.425559 | -42.5      |
| <b>TS4(RR)</b>             | -4808.390724 | -20.6      | <b>P(S)</b>    | -4808.425559 | -42.5      |
| <b>TS4(RS)</b>             | -4808.374488 | -10.4      |                |              |            |



Fig.S1 Free energy profiles and optimized transition states of direct and DABCO- and H<sub>2</sub>O-assisted proton transfer. The solvation-corrected relative free energies at SMD(toluene)/M06-2X/6-311++G(d,p) level are given in kcal/mol. Key bond lengths are given in Å.

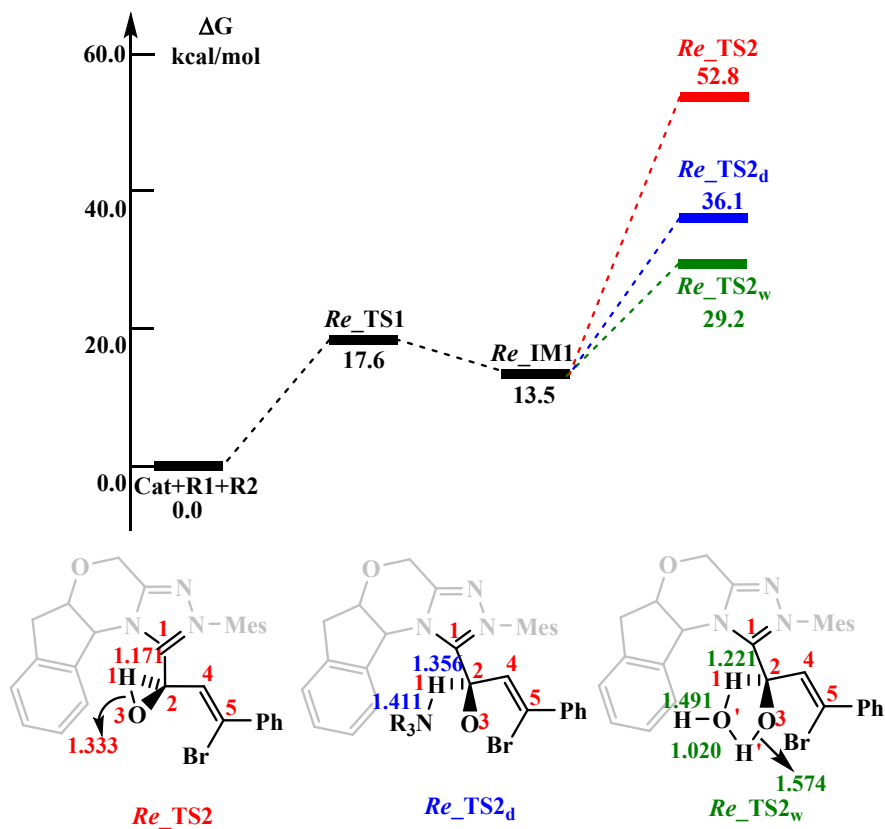

Fig.S2 Free energy profiles of the *RR*-, *RS*- and *SR*-configurational pathways. The solvation-corrected relative free energies at SMD(toluene)/M06-2X/6-311++G(d,p) level are given in kcal/mol.

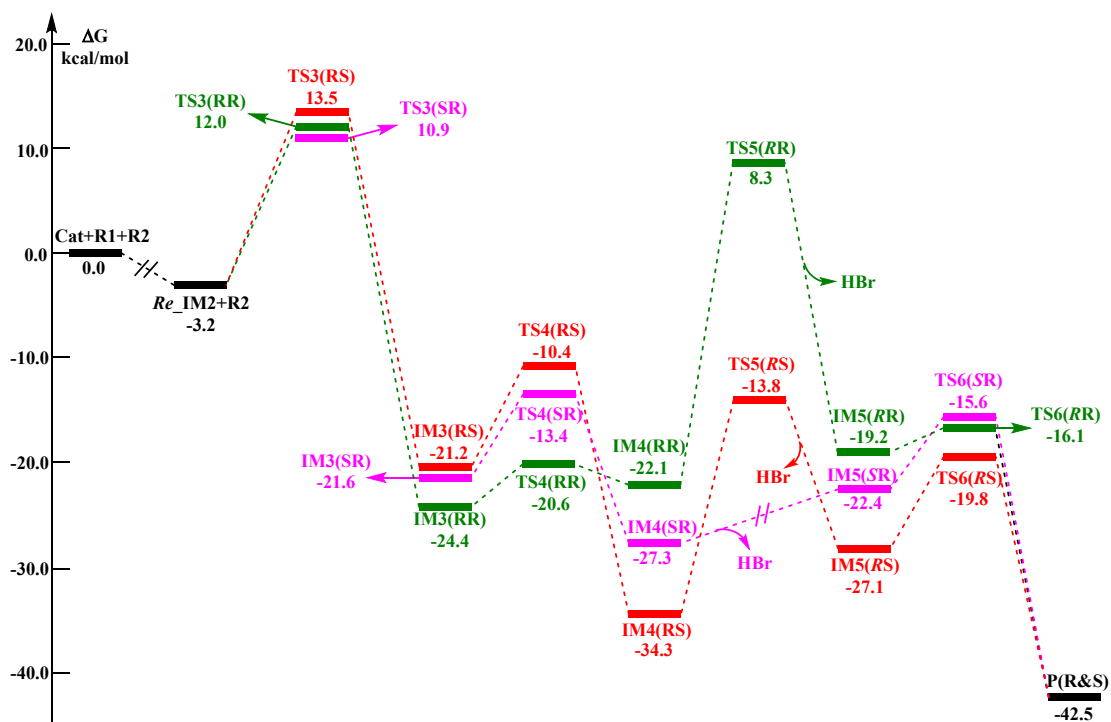



Fig. S3 Superposition of the optimized geometry **R2** (magenta) with the corresponding **R2**-parts in **TS3(SS)/TS3(SR)** (cyan).

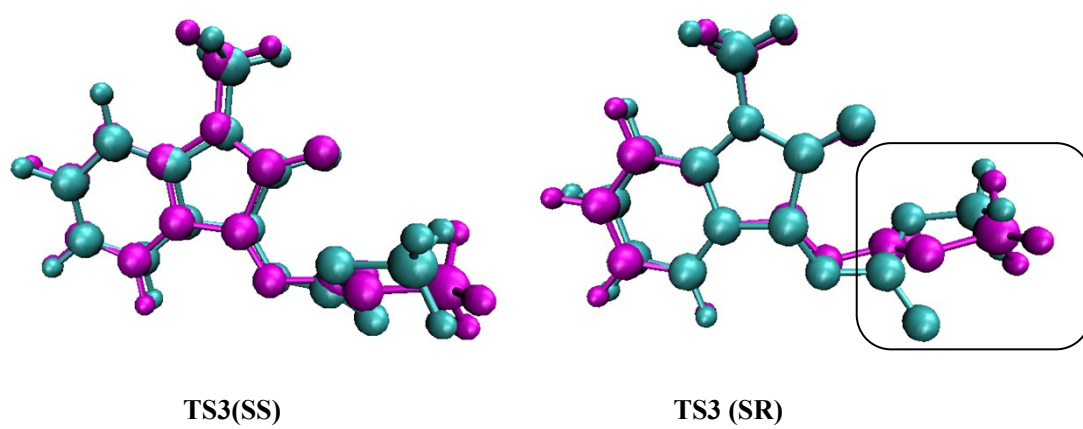

Fig. S4 Superposition of the optimized geometry **Re-IM2** (yellow) with the corresponding **Re-IM2**-parts in **TS3(SS)/TS3(SR)** (cyan).

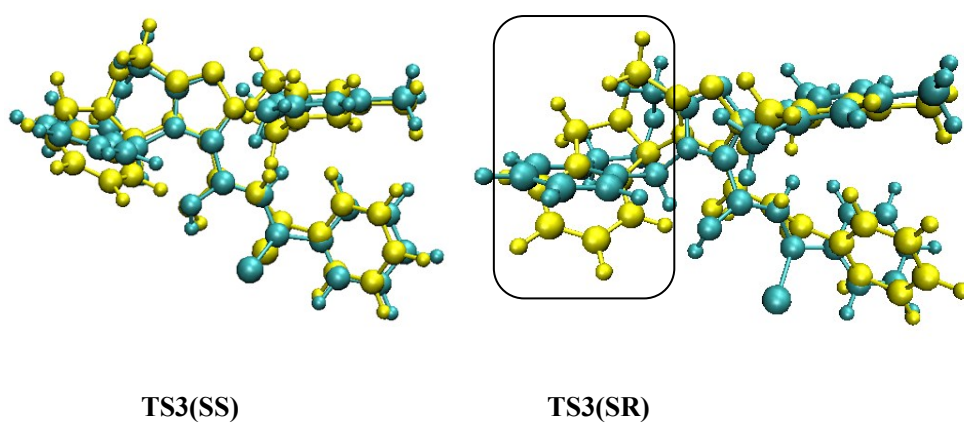



Fig.S5 Comparison between Br<sup>-</sup> (left) and DABCO (right) assisted deprotonation. The solvation-corrected relative free energies at SMD(toluene)/M06-2X/6-311++G(d,p) level are given in kcal/mol.

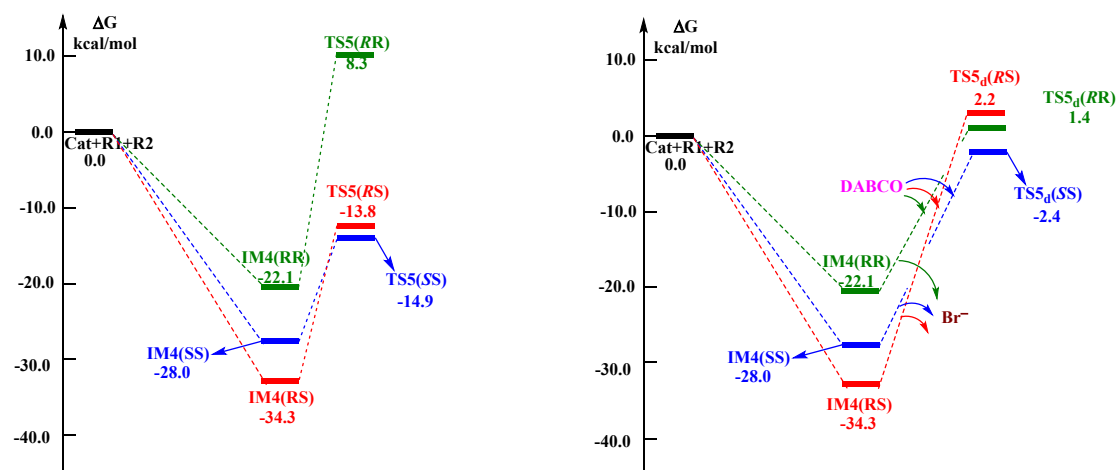

## Cartesian coordinates

### DABCO

|   |             |             |             |
|---|-------------|-------------|-------------|
| C | -0.78666700 | 1.30696900  | -0.42007200 |
| C | 0.77165600  | 1.31294700  | -0.42865600 |
| H | -1.19527900 | 1.51709100  | -1.41419600 |
| H | -1.18752300 | 2.06047200  | 0.26636300  |
| H | 1.16739900  | 1.52549100  | -1.42764300 |
| H | 1.17370500  | 2.07049400  | 0.25259000  |
| C | -0.78036000 | -1.02530600 | -0.91838100 |
| H | -1.17663500 | -1.99582500 | -0.60087500 |
| H | -1.18777700 | -0.81309700 | -1.91246700 |
| C | 0.77842300  | -1.01964300 | -0.92615700 |
| H | 1.18516100  | -1.98676700 | -0.61134100 |
| H | 1.17493600  | -0.80499700 | -1.92417900 |
| C | 0.78777600  | -0.28423400 | 1.34256000  |
| H | 1.19428500  | -1.25273900 | 1.65240100  |
| H | 1.18984600  | 0.47462200  | 2.02242400  |
| C | -0.77075700 | -0.29066500 | 1.35068100  |
| H | -1.16638200 | -1.26230500 | 1.66482900  |
| H | -1.17268900 | 0.46509600  | 2.03425500  |
| N | -1.28414700 | -0.00491200 | 0.00661800  |
| N | 1.28422200  | 0.00520600  | -0.00690600 |

### R1

|   |            |            |            |
|---|------------|------------|------------|
| C | 0.42745300 | 0.37964200 | 0.08261400 |
|---|------------|------------|------------|

|           |             |             |             |
|-----------|-------------|-------------|-------------|
| C         | 1.04634000  | 1.54904900  | 0.31725800  |
| C         | 2.49775800  | 1.82656300  | 0.33700600  |
| H         | 0.40735900  | 2.40098200  | 0.53522600  |
| H         | 2.73915300  | 2.88734000  | 0.55102100  |
| O         | 3.38184800  | 1.02393000  | 0.14730800  |
| C         | -1.04572900 | 0.24554600  | 0.04397900  |
| C         | -1.68899700 | -0.88883800 | 0.55075200  |
| C         | -1.81776300 | 1.28687700  | -0.48532800 |
| C         | -3.07618100 | -0.96519300 | 0.55240400  |
| C         | -3.20488200 | 1.20121500  | -0.49289900 |
| H         | -1.32462600 | 2.15018100  | -0.92071900 |
| C         | -3.83803000 | 0.07750000  | 0.03103100  |
| H         | -3.56331600 | -1.84457400 | 0.96052300  |
| H         | -3.79048200 | 2.00883200  | -0.91975400 |
| H         | -1.09458200 | -1.70467900 | 0.94750500  |
| H         | -4.92099200 | 0.01001000  | 0.02411200  |
| Br        | 1.39122500  | -1.21067700 | -0.22792200 |
| <b>R2</b> |             |             |             |
| N         | -1.17058700 | -1.33283100 | 0.17827000  |
| C         | -2.49055300 | -0.83579900 | 0.31125800  |
| O         | -3.08422400 | -0.79460800 | 1.35370900  |
| O         | -2.99292100 | -0.53741200 | -0.88951000 |
| C         | -4.29576900 | 0.04592200  | -0.83767800 |
| H         | -4.57513200 | 0.23526100  | -1.87250300 |
| H         | -5.00261000 | -0.63813200 | -0.36427500 |

|            |             |             |             |
|------------|-------------|-------------|-------------|
| H          | -4.25651200 | 0.97818200  | -0.27034700 |
| C          | 3.96267500  | -0.64776600 | -0.18367200 |
| C          | 3.32474800  | -1.88698100 | -0.14883100 |
| C          | 1.93412800  | -1.95973100 | -0.04761900 |
| C          | 1.21674200  | -0.77740300 | 0.01592900  |
| C          | 1.86988100  | 0.46469500  | -0.01924800 |
| C          | 3.24794700  | 0.55308600  | -0.11960700 |
| H          | 5.04445800  | -0.60895000 | -0.26274600 |
| H          | 3.91275100  | -2.79634000 | -0.19908400 |
| H          | 1.41236800  | -2.91080000 | -0.01695000 |
| H          | 3.75579500  | 1.51101200  | -0.14797000 |
| C          | -0.21755800 | -0.50196400 | 0.12189400  |
| C          | -0.34525300 | 1.02895400  | 0.14772000  |
| O          | -1.36552300 | 1.67343200  | 0.22718000  |
| N          | 0.93966200  | 1.51261000  | 0.05907300  |
| C          | 1.26802900  | 2.91868800  | 0.05556300  |
| H          | 1.90347700  | 3.16836800  | 0.91046000  |
| H          | 1.78342700  | 3.19194500  | -0.87004400 |
| H          | 0.32970900  | 3.46949200  | 0.12677000  |
| <b>Cat</b> |             |             |             |
| C          | 4.50346300  | 2.66808700  | -0.22040300 |
| C          | 4.97758000  | 1.39409100  | 0.08250700  |
| C          | 4.16708400  | 0.29345800  | -0.18401100 |
| C          | 2.42325200  | 1.74689000  | -1.04638400 |
| C          | 3.23511700  | 2.84553700  | -0.77981700 |

|   |             |             |             |
|---|-------------|-------------|-------------|
| H | 5.12326500  | 3.53461200  | -0.01246800 |
| H | 5.96039900  | 1.26353100  | 0.52627700  |
| H | 1.42858800  | 1.86187400  | -1.46987100 |
| H | 2.88140400  | 3.84680800  | -1.00325700 |
| C | 2.90879700  | 0.47897000  | -0.74734100 |
| C | 2.18721800  | -0.83590500 | -0.94363900 |
| C | 3.09613800  | -1.88988800 | -0.20928800 |
| H | 2.07776000  | -1.07865700 | -2.00391700 |
| C | 4.44434800  | -1.17026800 | 0.05074800  |
| H | 3.23177400  | -2.77107000 | -0.83858200 |
| H | 4.78938500  | -1.38998800 | 1.06625700  |
| H | 5.21372600  | -1.53892600 | -0.63638900 |
| N | 0.85345700  | -0.80027500 | -0.37821800 |
| O | 2.52257500  | -2.40439300 | 0.98142800  |
| C | 0.65795500  | -0.98723900 | 0.96405500  |
| C | 1.82341700  | -1.45569000 | 1.76937700  |
| H | 2.47175500  | -0.61079200 | 2.04716900  |
| H | 1.49180400  | -1.96109900 | 2.67670700  |
| N | -0.58001500 | -0.78176300 | 1.28175400  |
| C | -0.30634900 | -0.42114200 | -1.00241400 |
| N | -1.13949200 | -0.42986200 | 0.06443900  |
| C | -2.52916500 | -0.09380400 | 0.02278300  |
| C | -2.96061400 | 1.05696100  | 0.68911000  |
| C | -3.40747600 | -0.92213300 | -0.67940000 |
| C | -4.31756800 | 1.36819500  | 0.64069600  |

|   |             |             |             |
|---|-------------|-------------|-------------|
| C | -4.75542700 | -0.56528200 | -0.70660200 |
| C | -5.22796700 | 0.57205300  | -0.05446600 |
| H | -4.67037900 | 2.26079700  | 1.15292200  |
| H | -5.45410100 | -1.19877000 | -1.24823000 |
| C | -1.98248600 | 1.93382700  | 1.42445100  |
| H | -1.61390400 | 1.43795100  | 2.32643000  |
| H | -1.11048200 | 2.15053100  | 0.79879500  |
| H | -2.45137100 | 2.87803400  | 1.70833900  |
| C | -2.91306200 | -2.15789900 | -1.38223100 |
| H | -2.22770600 | -1.89224900 | -2.19108000 |
| H | -2.35935000 | -2.80209000 | -0.69201300 |
| H | -3.74976300 | -2.72624400 | -1.79315000 |
| C | -6.68440700 | 0.95429900  | -0.12258500 |
| H | -6.85191900 | 1.71149100  | -0.89568000 |
| H | -7.30943200 | 0.09124000  | -0.36300000 |
| H | -7.02877900 | 1.37276000  | 0.82662400  |

**Re\_TS1**

|   |             |             |            |
|---|-------------|-------------|------------|
| C | 2.24360800  | 1.14705100  | 0.83338000 |
| C | 1.09402100  | 0.67046500  | 1.31698600 |
| C | -0.32261700 | 1.09256300  | 1.01977900 |
| H | 1.16811200  | -0.11806100 | 2.06500200 |
| H | -0.89971800 | 1.08793100  | 1.97386600 |
| O | -0.62307400 | 1.91204700  | 0.12568000 |
| C | 3.57668400  | 0.69124000  | 1.30222500 |
| C | 3.72691100  | 0.19905100  | 2.60563700 |



|    |             |             |             |
|----|-------------|-------------|-------------|
| C  | 4.69854500  | 0.70832000  | 0.46593800  |
| C  | 4.94856900  | -0.29831600 | 3.04390100  |
| C  | 5.92078400  | 0.21253100  | 0.90627000  |
| H  | 4.60083200  | 1.11104700  | -0.53620400 |
| C  | 6.05104000  | -0.30047700 | 2.19390600  |
| H  | 5.04241800  | -0.67042600 | 4.05918500  |
| H  | 6.77602300  | 0.23008100  | 0.23737100  |
| H  | 2.88631900  | 0.23080500  | 3.29094400  |
| H  | 7.00662000  | -0.68257300 | 2.53829600  |
| Br | 2.26994500  | 2.44637000  | -0.55389700 |
| C  | -6.07395600 | 2.47629300  | -0.56718600 |
| C  | -6.54997300 | 1.33220500  | 0.06958400  |
| C  | -5.63246700 | 0.44543300  | 0.62403200  |
| C  | -3.77747700 | 1.85208000  | -0.08853900 |
| C  | -4.70377500 | 2.73367100  | -0.64363800 |
| H  | -6.77723000 | 3.17561300  | -1.00866800 |
| H  | -7.61630300 | 1.13386800  | 0.12679000  |
| H  | -2.70473600 | 2.04555000  | -0.13671700 |
| H  | -4.35317700 | 3.63205400  | -1.14125900 |
| C  | -4.26755000 | 0.71004800  | 0.53763600  |
| C  | -3.46413600 | -0.38959600 | 1.20306100  |
| C  | -4.51377100 | -1.53650000 | 1.44321800  |
| H  | -3.03007600 | -0.05970500 | 2.15133500  |
| C  | -5.88972100 | -0.83984800 | 1.37026200  |
| H  | -4.34706500 | -2.01060900 | 2.41220800  |

|   |             |             |             |
|---|-------------|-------------|-------------|
| H | -6.61203000 | -1.50026600 | 0.88142100  |
| H | -6.26654200 | -0.63423100 | 2.37885000  |
| N | -2.37071900 | -0.87158000 | 0.37082500  |
| O | -4.41262100 | -2.60330200 | 0.51072500  |
| C | -2.62502200 | -1.70912200 | -0.68347500 |
| C | -4.01429400 | -2.23973500 | -0.80194600 |
| H | -4.68997000 | -1.49234300 | -1.23965100 |
| H | -4.02783000 | -3.14262900 | -1.41216000 |
| N | -1.53475700 | -2.00326600 | -1.32093200 |
| C | -1.04277900 | -0.60197700 | 0.41363300  |
| N | -0.57514000 | -1.29849800 | -0.62988700 |
| C | 0.79867100  | -1.37114800 | -1.04226800 |
| C | 1.24112800  | -0.49805800 | -2.03445100 |
| C | 1.63441000  | -2.28377700 | -0.39510000 |
| C | 2.59402700  | -0.55363600 | -2.37065700 |
| C | 2.97453200  | -2.30328200 | -0.76757800 |
| C | 3.46823400  | -1.44603300 | -1.75374500 |
| H | 2.97386600  | 0.13698000  | -3.11985500 |
| H | 3.65337100  | -2.98976200 | -0.26703900 |
| C | 0.29790700  | 0.48582900  | -2.66954800 |
| H | -0.54256300 | -0.03436000 | -3.13995800 |
| H | -0.09659800 | 1.17002100  | -1.90949000 |
| H | 0.81621400  | 1.07000600  | -3.43256300 |
| C | 1.09918900  | -3.18348900 | 0.68649200  |
| H | 0.78860700  | -2.60143200 | 1.56107200  |

|   |            |             |             |
|---|------------|-------------|-------------|
| H | 0.22329300 | -3.73952800 | 0.33870800  |
| H | 1.86022300 | -3.89727800 | 1.00611900  |
| C | 4.92176200 | -1.49903000 | -2.14625800 |
| H | 5.54804800 | -1.75253800 | -1.28722700 |
| H | 5.08814800 | -2.25600400 | -2.91994000 |
| H | 5.25863600 | -0.53823900 | -2.54462400 |

**Si\_TS1**

|    |             |             |             |
|----|-------------|-------------|-------------|
| C  | 0.20153400  | 2.00322100  | 1.01057100  |
| C  | -0.18269700 | 0.92774500  | 1.70146800  |
| C  | 0.65919300  | -0.26080300 | 2.16637400  |
| H  | -1.24959600 | 0.85723900  | 1.92384200  |
| H  | 0.02540700  | -0.85847800 | 2.87613600  |
| O  | 1.88741500  | -0.15632300 | 2.37698600  |
| C  | -0.74586000 | 3.04051100  | 0.53783600  |
| C  | -0.61020400 | 3.62476900  | -0.72730500 |
| C  | -1.85683600 | 3.38153100  | 1.32023700  |
| C  | -1.57656300 | 4.50331400  | -1.20690200 |
| C  | -2.81919800 | 4.26227200  | 0.83988500  |
| H  | -1.95127700 | 2.96525200  | 2.31811000  |
| C  | -2.68655100 | 4.82303700  | -0.42814800 |
| H  | -1.45795900 | 4.94326700  | -2.19207600 |
| H  | -3.66927800 | 4.51997600  | 1.46334900  |
| H  | 0.26241400  | 3.38467200  | -1.32564700 |
| H  | -3.43521400 | 5.51460100  | -0.80083800 |
| Br | 2.00248900  | 2.19987900  | 0.44533900  |

|   |             |             |             |
|---|-------------|-------------|-------------|
| C | -4.95435000 | 0.45310100  | -1.41279700 |
| C | -5.27893800 | -0.79480100 | -0.88224100 |
| C | -4.32230900 | -1.48132600 | -0.14091300 |
| C | -2.72286900 | 0.31175900  | -0.48971400 |
| C | -3.68488900 | 1.00230800  | -1.22320700 |
| H | -5.69430400 | 0.99842600  | -1.98980600 |
| H | -6.26099600 | -1.22644300 | -1.05141800 |
| H | -1.72901800 | 0.72757000  | -0.35946500 |
| H | -3.43632900 | 1.97260400  | -1.64252000 |
| C | -3.06468000 | -0.91764800 | 0.06291300  |
| C | -2.20601400 | -1.82847500 | 0.91917200  |
| C | -2.96550600 | -3.19955900 | 0.88878900  |
| H | -2.11949200 | -1.46029300 | 1.94670200  |
| C | -4.42140300 | -2.83272200 | 0.52424900  |
| H | -2.90141900 | -3.69561600 | 1.85880800  |
| H | -4.84971900 | -3.60806800 | -0.11717500 |
| H | -5.03676100 | -2.77941500 | 1.42961500  |
| N | -0.86166900 | -1.97909700 | 0.39151100  |
| O | -2.40100100 | -4.13406900 | -0.02018800 |
| C | -0.63912500 | -2.75524200 | -0.71439000 |
| C | -1.77889300 | -3.60186700 | -1.17821500 |
| H | -2.48084300 | -3.01094800 | -1.78274200 |
| H | -1.41589400 | -4.44276800 | -1.76894700 |
| N | 0.59265000  | -2.66018900 | -1.10571000 |
| C | 0.28561700  | -1.34227500 | 0.72133200  |

|   |            |             |             |
|---|------------|-------------|-------------|
| N | 1.14536700 | -1.77335800 | -0.20472200 |
| C | 2.50057600 | -1.33678000 | -0.41769000 |
| C | 2.71885000 | -0.43189500 | -1.45521900 |
| C | 3.52138300 | -1.84643100 | 0.38412700  |
| C | 4.03001000 | -0.02031500 | -1.68357900 |
| C | 4.81433000 | -1.40403400 | 0.11633900  |
| C | 5.08570200 | -0.49292900 | -0.90522300 |
| H | 4.22702700 | 0.69293500  | -2.48022500 |
| H | 5.63144100 | -1.77831800 | 0.72826800  |
| C | 1.57123200 | 0.09987600  | -2.27121700 |
| H | 1.15699900 | -0.67376800 | -2.92457000 |
| H | 0.76775300 | 0.45670200  | -1.61703300 |
| H | 1.89914300 | 0.93967800  | -2.88700600 |
| C | 3.22866800 | -2.79521500 | 1.51105600  |
| H | 2.77406100 | -2.22063900 | 2.32539400  |
| H | 2.53605500 | -3.58318200 | 1.19984200  |
| H | 4.14782500 | -3.26436600 | 1.86701200  |
| C | 6.49390700 | -0.00963000 | -1.13878400 |
| H | 6.76571900 | 0.75426100  | -0.40335300 |
| H | 7.21280500 | -0.82741500 | -1.04310800 |
| H | 6.60387300 | 0.42943100  | -2.13280700 |

**Re\_IM1**

|   |             |             |            |
|---|-------------|-------------|------------|
| C | -2.21868500 | -0.98722300 | 0.91637800 |
| C | -1.12022400 | -0.34488300 | 1.31292600 |
| C | 0.35649000  | -0.66717400 | 1.08077700 |

|    |             |             |             |
|----|-------------|-------------|-------------|
| H  | -1.29261800 | 0.53515000  | 1.93667300  |
| H  | 0.78152500  | -0.59403900 | 2.12418800  |
| O  | 0.71173700  | -1.72530500 | 0.38694900  |
| C  | -3.58495500 | -0.57731200 | 1.32753100  |
| C  | -3.79296800 | -0.03037000 | 2.59971200  |
| C  | -4.68062100 | -0.69458200 | 0.46480800  |
| C  | -5.05149500 | 0.41777200  | 2.98620000  |
| C  | -5.93839500 | -0.24657700 | 0.85271600  |
| H  | -4.53383100 | -1.14021300 | -0.51388600 |
| C  | -6.12982700 | 0.31669100  | 2.11238300  |
| H  | -5.19167800 | 0.83196400  | 3.97973700  |
| H  | -6.77469600 | -0.34364400 | 0.16655400  |
| H  | -2.96435700 | 0.01727200  | 3.29914300  |
| H  | -7.11405000 | 0.65869000  | 2.41581000  |
| Br | -2.15111400 | -2.47618500 | -0.26142300 |
| C  | 6.01114900  | -2.37376900 | -0.82387500 |
| C  | 6.48757700  | -1.28869800 | -0.09162100 |
| C  | 5.57060500  | -0.46966200 | 0.55993300  |
| C  | 3.71645800  | -1.83407300 | -0.24253700 |
| C  | 4.64268000  | -2.64458600 | -0.89563200 |
| H  | 6.71366400  | -3.01881500 | -1.34265700 |
| H  | 7.55268200  | -1.08409400 | -0.03412600 |
| H  | 2.64157100  | -2.02638100 | -0.25363300 |
| H  | 4.29629600  | -3.50146800 | -1.46439200 |
| C  | 4.20832400  | -0.74522200 | 0.47139400  |

|   |             |             |             |
|---|-------------|-------------|-------------|
| C | 3.40094100  | 0.27951300  | 1.24166100  |
| C | 4.44430300  | 1.40279600  | 1.59998800  |
| H | 2.94520300  | -0.14353700 | 2.14059600  |
| C | 5.82744300  | 0.73946800  | 1.42384500  |
| H | 4.28708000  | 1.76019400  | 2.61895300  |
| H | 6.52810100  | 1.45795700  | 0.98769800  |
| H | 6.23233400  | 0.44165500  | 2.39763600  |
| N | 2.32612300  | 0.85050000  | 0.43296200  |
| O | 4.31041400  | 2.57007100  | 0.80078900  |
| C | 2.59958700  | 1.76165400  | -0.55025000 |
| C | 3.97545600  | 2.34132600  | -0.55709500 |
| H | 4.68822500  | 1.66416900  | -1.04731000 |
| H | 3.97965300  | 3.30410900  | -1.06829000 |
| N | 1.53687800  | 2.05575700  | -1.23404300 |
| C | 1.01398400  | 0.54690000  | 0.36076000  |
| N | 0.56028800  | 1.28148900  | -0.65859700 |
| C | -0.78282100 | 1.29928100  | -1.17219200 |
| C | -1.15831000 | 0.29712100  | -2.06308300 |
| C | -1.65257500 | 2.28623000  | -0.70035700 |
| C | -2.49574400 | 0.28533200  | -2.46474000 |
| C | -2.97095000 | 2.23239800  | -1.13439200 |
| C | -3.40878000 | 1.23284300  | -2.00913200 |
| H | -2.82997500 | -0.50328500 | -3.13434300 |
| H | -3.68024500 | 2.97031300  | -0.76739300 |
| C | -0.17142700 | -0.74076400 | -2.52030800 |

|   |             |             |             |
|---|-------------|-------------|-------------|
| H | 0.68129800  | -0.26492100 | -3.01705700 |
| H | 0.19823700  | -1.30884200 | -1.65515700 |
| H | -0.64376800 | -1.42839400 | -3.22415600 |
| C | -1.17227300 | 3.33399300  | 0.26716500  |
| H | -0.83719100 | 2.87884700  | 1.20625000  |
| H | -0.32560300 | 3.89108400  | -0.14487800 |
| H | -1.97208200 | 4.03857800  | 0.50043000  |
| C | -4.84952300 | 1.19443300  | -2.44688100 |
| H | -5.08967000 | 0.24559700  | -2.93263900 |
| H | -5.51567000 | 1.31894000  | -1.58822100 |
| H | -5.06420900 | 2.00008400  | -3.15638700 |

#### Si\_IM1

|   |             |             |             |
|---|-------------|-------------|-------------|
| C | 0.20921900  | 1.97940000  | 0.98840100  |
| C | -0.24446800 | 0.87930300  | 1.59201500  |
| C | 0.54719900  | -0.38658400 | 2.00698800  |
| H | -1.32072300 | 0.85163100  | 1.77548000  |
| H | -0.12799200 | -0.88146800 | 2.77365100  |
| O | 1.79747900  | -0.29397100 | 2.28755500  |
| C | -0.67954600 | 3.08023000  | 0.54243200  |
| C | -0.45586900 | 3.74042400  | -0.67147600 |
| C | -1.81757900 | 3.41330100  | 1.28862300  |
| C | -1.36107100 | 4.68730200  | -1.13874400 |
| C | -2.71817900 | 4.36409900  | 0.82166000  |
| H | -1.98027700 | 2.93784700  | 2.25083100  |
| C | -2.49725800 | 5.00151100  | -0.39696900 |



|    |             |             |             |
|----|-------------|-------------|-------------|
| H  | -1.17442400 | 5.18494200  | -2.08522100 |
| H  | -3.58915300 | 4.61651500  | 1.41808000  |
| H  | 0.43791700  | 3.50384300  | -1.23895900 |
| H  | -3.19808200 | 5.74679300  | -0.75919700 |
| Br | 2.04142000  | 2.15776800  | 0.52417300  |
| C  | -5.02728100 | 0.42104800  | -1.46645400 |
| C  | -5.33687700 | -0.81450000 | -0.90055600 |
| C  | -4.36934600 | -1.47231600 | -0.14878400 |
| C  | -2.78780900 | 0.32496300  | -0.55252800 |
| C  | -3.76147300 | 0.98503400  | -1.29903600 |
| H  | -5.77556700 | 0.94493600  | -2.05251700 |
| H  | -6.31597600 | -1.25993600 | -1.05028100 |
| H  | -1.79935300 | 0.75902700  | -0.43841900 |
| H  | -3.52568100 | 1.94571100  | -1.74617200 |
| C  | -3.11413100 | -0.89380400 | 0.03398800  |
| C  | -2.25181900 | -1.78322100 | 0.91212000  |
| C  | -2.99603800 | -3.16260100 | 0.89391800  |
| H  | -2.17783700 | -1.40115200 | 1.93565200  |
| C  | -4.45738600 | -2.80709900 | 0.54970200  |
| H  | -2.91086700 | -3.65762600 | 1.86306000  |
| H  | -4.89822100 | -3.59733200 | -0.06439200 |
| H  | -5.05384400 | -2.73092400 | 1.46626500  |
| N  | -0.90027400 | -1.93779900 | 0.40066400  |
| O  | -2.43647900 | -4.08989600 | -0.02675800 |
| C  | -0.66239000 | -2.71830100 | -0.69690500 |

|   |             |             |             |
|---|-------------|-------------|-------------|
| C | -1.80300900 | -3.55454800 | -1.17655400 |
| H | -2.49443300 | -2.95513700 | -1.78410300 |
| H | -1.43818300 | -4.39393900 | -1.76854300 |
| N | 0.58030100  | -2.64574300 | -1.05762800 |
| C | 0.25681600  | -1.33627400 | 0.75013600  |
| N | 1.13787900  | -1.77351900 | -0.15089600 |
| C | 2.49800500  | -1.34534300 | -0.37833700 |
| C | 2.69948400  | -0.43594300 | -1.41346300 |
| C | 3.53189000  | -1.89616000 | 0.37840300  |
| C | 4.01280400  | -0.05234700 | -1.68189300 |
| C | 4.82347000  | -1.48170900 | 0.06989800  |
| C | 5.08162200  | -0.56109000 | -0.94839900 |
| H | 4.19836700  | 0.66761600  | -2.47520200 |
| H | 5.65235200  | -1.88440000 | 0.64725700  |
| C | 1.54125300  | 0.12551400  | -2.19449800 |
| H | 1.10894000  | -0.62881600 | -2.85935900 |
| H | 0.75195600  | 0.48021400  | -1.52204700 |
| H | 1.86712500  | 0.97507100  | -2.79786200 |
| C | 3.24717600  | -2.84949900 | 1.50172300  |
| H | 2.75355600  | -2.27694200 | 2.29563800  |
| H | 2.58404900  | -3.65856300 | 1.17788400  |
| H | 4.17173800  | -3.29136000 | 1.87789100  |
| C | 6.49345600  | -0.11204800 | -1.22377900 |
| H | 6.82977500  | 0.59413100  | -0.45791700 |
| H | 7.18520900  | -0.95864600 | -1.21493900 |

|               |             |             |             |
|---------------|-------------|-------------|-------------|
| H             | 6.57140800  | 0.38400000  | -2.19377700 |
| <b>Re_TS2</b> |             |             |             |
| C             | 2.20281000  | -0.98873200 | -0.96082800 |
| C             | 1.20724500  | -0.14799700 | -1.27335200 |
| C             | -0.25218400 | -0.32336000 | -1.23085500 |
| H             | 1.53239100  | 0.83352400  | -1.62198800 |
| H             | -0.77994900 | -0.70838600 | -2.20317800 |
| O             | -0.88622600 | -1.62950200 | -1.24615000 |
| C             | 3.62733200  | -0.64350500 | -1.14082700 |
| C             | 4.01684900  | 0.16501100  | -2.21773700 |
| C             | 4.60568100  | -1.04792300 | -0.22406300 |
| C             | 5.33446800  | 0.58736900  | -2.35131100 |
| C             | 5.92359800  | -0.62856700 | -0.36285500 |
| H             | 4.31675000  | -1.68695000 | 0.60404000  |
| C             | 6.29454500  | 0.19716800  | -1.42176100 |
| H             | 5.61491900  | 1.20905200  | -3.19590600 |
| H             | 6.66488600  | -0.94839200 | 0.36369000  |
| H             | 3.28094300  | 0.44269700  | -2.96587600 |
| H             | 7.32504600  | 0.51966200  | -1.53050100 |
| Br            | 1.84459700  | -2.62845900 | -0.07533800 |
| C             | -5.58220400 | -2.40992600 | 1.40486900  |
| C             | -6.20409100 | -1.41599400 | 0.65402100  |
| C             | -5.42472800 | -0.62097600 | -0.18264000 |
| C             | -3.41950500 | -1.83095000 | 0.47335000  |
| C             | -4.20419500 | -2.62042500 | 1.30995900  |

|   |             |             |             |
|---|-------------|-------------|-------------|
| H | -6.17721800 | -3.03440700 | 2.06401900  |
| H | -7.27769600 | -1.26445500 | 0.71897900  |
| H | -2.35205200 | -1.99695900 | 0.33840600  |
| H | -3.74138400 | -3.41428200 | 1.88731200  |
| C | -4.04969100 | -0.82469400 | -0.25268000 |
| C | -3.39664300 | 0.16013600  | -1.19987900 |
| C | -4.56119900 | 1.14303500  | -1.61204500 |
| H | -2.96363400 | -0.34677300 | -2.06437400 |
| C | -5.86654300 | 0.47915600  | -1.11321000 |
| H | -4.56510000 | 1.27962900  | -2.69419800 |
| H | -6.50260400 | 1.23169700  | -0.63540800 |
| H | -6.43402500 | 0.07126600  | -1.95648500 |
| N | -2.32264300 | 0.90689000  | -0.55039500 |
| O | -4.40699200 | 2.45757800  | -1.10097400 |
| C | -2.57616000 | 1.98929300  | 0.25130800  |
| C | -3.97456900 | 2.50783600  | 0.24602500  |
| H | -4.61984900 | 1.90753000  | 0.90323000  |
| H | -3.99501700 | 3.54788600  | 0.57085500  |
| N | -1.49943600 | 2.46485700  | 0.79163400  |
| C | -0.98065500 | 0.69049700  | -0.52733400 |
| N | -0.50517500 | 1.63456500  | 0.32037000  |
| C | 0.75974700  | 1.53340200  | 0.99367300  |
| C | 0.97494400  | 0.40203100  | 1.78609100  |
| C | 1.74601000  | 2.48628900  | 0.74007400  |
| C | 2.25695300  | 0.21832100  | 2.29964300  |

|   |             |             |             |
|---|-------------|-------------|-------------|
| C | 3.00649500  | 2.26639000  | 1.28910500  |
| C | 3.28217800  | 1.13281200  | 2.05597500  |
| H | 2.46220300  | -0.67551000 | 2.88417800  |
| H | 3.80054800  | 2.98199800  | 1.09029800  |
| C | -0.11266300 | -0.61737800 | 2.00692300  |
| H | -1.06351500 | -0.13409400 | 2.25790700  |
| H | -0.26636200 | -1.23540200 | 1.11272700  |
| H | 0.16021200  | -1.28629400 | 2.82551500  |
| C | 1.45331000  | 3.67109300  | -0.13989900 |
| H | 1.18503900  | 3.34828300  | -1.15226600 |
| H | 0.60891700  | 4.24870400  | 0.24634900  |
| H | 2.32419800  | 4.32490800  | -0.20953100 |
| C | 4.66056900  | 0.91375600  | 2.62229900  |
| H | 4.85606600  | -0.15006500 | 2.77943100  |
| H | 5.42561100  | 1.30283600  | 1.94611800  |
| H | 4.77007600  | 1.42057000  | 3.58701200  |

**Re\_TS2<sub>d</sub>**

|   |             |            |             |
|---|-------------|------------|-------------|
| C | 2.05922600  | 0.02590300 | -1.40724500 |
| C | 1.13095400  | 0.53992900 | -0.59283000 |
| C | -0.35815400 | 0.40623500 | -0.65297500 |
| H | 1.53192100  | 1.09208400 | 0.25636900  |
| H | -0.80314900 | 1.61381100 | -0.22525800 |
| O | -1.01226900 | 0.29967200 | -1.78909600 |
| C | 3.50834500  | 0.17597700 | -1.16201800 |
| C | 3.99991800  | 1.35913200 | -0.59328300 |

|    |             |             |             |
|----|-------------|-------------|-------------|
| C  | 4.40243600  | -0.87843400 | -1.38486700 |
| C  | 5.33613400  | 1.47315100  | -0.22993300 |
| C  | 5.74006700  | -0.76103100 | -1.02281600 |
| H  | 4.03331400  | -1.79352500 | -1.83536300 |
| C  | 6.21383000  | 0.41204700  | -0.44042100 |
| H  | 5.69677400  | 2.39978100  | 0.20622100  |
| H  | 6.41627800  | -1.59228800 | -1.19778200 |
| H  | 3.32582700  | 2.19778400  | -0.44832100 |
| H  | 7.25893300  | 0.50231100  | -0.16138600 |
| Br | 1.55922300  | -1.16341700 | -2.80724500 |
| C  | -1.83638700 | -4.94926300 | -1.16593000 |
| C  | -2.91303300 | -4.70613400 | -0.31361200 |
| C  | -3.29925700 | -3.39017300 | -0.08000600 |
| C  | -1.55437600 | -2.57477100 | -1.56634500 |
| C  | -1.16285900 | -3.89398300 | -1.78472700 |
| H  | -1.51974800 | -5.97178700 | -1.34891500 |
| H  | -3.43520800 | -5.53051200 | 0.16384300  |
| H  | -1.06378000 | -1.72015600 | -2.03116900 |
| H  | -0.31880000 | -4.09490100 | -2.43831900 |
| C  | -2.62043200 | -2.34398600 | -0.70464300 |
| C  | -3.16342000 | -1.00233500 | -0.26839400 |
| C  | -4.49515200 | -1.37737200 | 0.44254700  |
| H  | -3.28358300 | -0.30746600 | -1.09852300 |
| C  | -4.38781200 | -2.87393800 | 0.82661700  |
| H  | -5.29947000 | -1.25439600 | -0.28595000 |

|   |             |             |             |
|---|-------------|-------------|-------------|
| H | -4.10506800 | -3.00342400 | 1.87739000  |
| H | -5.34405300 | -3.38696500 | 0.69296000  |
| N | -2.27510500 | -0.36275000 | 0.72406900  |
| O | -4.83013700 | -0.49650400 | 1.50061100  |
| C | -2.51580900 | -0.40189200 | 2.07917400  |
| C | -3.92460800 | -0.52275100 | 2.58071300  |
| H | -4.03578800 | -1.42496300 | 3.19494100  |
| H | -4.16283000 | 0.33776700  | 3.21014100  |
| N | -1.44564900 | -0.26504800 | 2.78771400  |
| C | -0.92518500 | -0.11182100 | 0.56892900  |
| N | -0.43053800 | -0.15096500 | 1.84872700  |
| C | 0.93488800  | -0.28523900 | 2.23187500  |
| C | 1.67855600  | -1.36322800 | 1.73379300  |
| C | 1.51371500  | 0.72400300  | 3.01111700  |
| C | 3.05079600  | -1.36917600 | 1.98660300  |
| C | 2.88308300  | 0.66061800  | 3.25173200  |
| C | 3.67150900  | -0.36652700 | 2.72868800  |
| H | 3.65351600  | -2.17501600 | 1.57309000  |
| H | 3.35220100  | 1.44814100  | 3.83759700  |
| C | 1.05198400  | -2.45230200 | 0.90417800  |
| H | 0.00916600  | -2.63161500 | 1.18293500  |
| H | 1.06595600  | -2.19675900 | -0.16231000 |
| H | 1.60682200  | -3.38514200 | 1.02973200  |
| C | 0.67524900  | 1.86419800  | 3.52251900  |
| H | 0.06650100  | 2.28601300  | 2.71520600  |

|   |             |             |             |
|---|-------------|-------------|-------------|
| H | -0.02238100 | 1.52572500  | 4.29379000  |
| H | 1.30524900  | 2.65352300  | 3.93760600  |
| C | 5.15716800  | -0.40312900 | 2.97506600  |
| H | 5.67478500  | -0.89252200 | 2.14670000  |
| H | 5.56386800  | 0.60623800  | 3.07805100  |
| H | 5.38885700  | -0.95186800 | 3.89437000  |
| C | -1.37882300 | 4.63860700  | -2.19721700 |
| C | -0.65882300 | 3.36847000  | -1.66742600 |
| H | -1.80245500 | 4.46339400  | -3.19046400 |
| H | -0.68675200 | 5.48251900  | -2.27699800 |
| H | -0.61113100 | 2.54312400  | -2.38320800 |
| H | 0.35886400  | 3.58428300  | -1.32442100 |
| C | -3.47554600 | 3.94799100  | -1.29032900 |
| H | -4.26050000 | 4.22435200  | -0.57904500 |
| H | -3.93315400 | 3.89100800  | -2.28230500 |
| C | -2.81403600 | 2.59457000  | -0.90684100 |
| H | -3.32277200 | 2.10356900  | -0.06968100 |
| H | -2.75075200 | 1.88246600  | -1.73256800 |
| C | -1.38301400 | 3.84311000  | 0.59156600  |
| H | -1.97830200 | 3.44361100  | 1.41995400  |
| H | -0.34746200 | 3.93987800  | 0.93408900  |
| C | -1.94900800 | 5.19073100  | 0.05425300  |
| H | -2.75255300 | 5.56212500  | 0.69739400  |
| H | -1.16871600 | 5.95757800  | 0.02148800  |
| N | -2.47546100 | 5.02078700  | -1.30024700 |



|                           |             |             |             |
|---------------------------|-------------|-------------|-------------|
| N                         | -1.41420500 | 2.85560000  | -0.49961800 |
| <b>Re_TS2<sub>w</sub></b> |             |             |             |
| C                         | -1.88461100 | -1.09455800 | 0.64797700  |
| C                         | -1.26074800 | -0.28841000 | 1.50733700  |
| C                         | 0.22026500  | -0.03675000 | 1.56107300  |
| H                         | -1.88490900 | 0.19964000  | 2.25323900  |
| H                         | 1.40310400  | -0.99263300 | 2.61603300  |
| O                         | 0.96706600  | -1.21997300 | 1.72278400  |
| C                         | -3.33484800 | -1.38123700 | 0.63817900  |
| C                         | -4.04511000 | -1.37452600 | 1.84489100  |
| C                         | -4.03208100 | -1.61345200 | -0.55316100 |
| C                         | -5.42257100 | -1.56662400 | 1.85566100  |
| C                         | -5.40819400 | -1.80886800 | -0.53898900 |
| H                         | -3.48486100 | -1.63389700 | -1.48951200 |
| C                         | -6.11042900 | -1.78287800 | 0.66462100  |
| H                         | -5.95581300 | -1.56556300 | 2.80074900  |
| H                         | -5.93402800 | -1.98423000 | -1.47226900 |
| H                         | -3.50866500 | -1.24519000 | 2.77922500  |
| H                         | -7.18367700 | -1.94306200 | 0.67478800  |
| Br                        | -0.86120300 | -1.88273100 | -0.75198200 |
| C                         | 5.18349100  | -2.81200300 | -1.29610300 |
| C                         | 5.88917200  | -1.73578200 | -0.76319800 |
| C                         | 5.19192600  | -0.76353000 | -0.05244400 |
| C                         | 3.10034100  | -1.95110300 | -0.40139000 |
| C                         | 3.80249200  | -2.91794700 | -1.11735100 |

|   |             |             |             |
|---|-------------|-------------|-------------|
| H | 5.71247800  | -3.57571200 | -1.85744200 |
| H | 6.96295400  | -1.65469300 | -0.90451800 |
| H | 2.02834500  | -2.02215900 | -0.24310700 |
| H | 3.27089000  | -3.76590400 | -1.53675600 |
| C | 3.81449200  | -0.87717300 | 0.12076500  |
| C | 3.27446000  | 0.29113100  | 0.91481200  |
| C | 4.47075000  | 1.30988100  | 0.97486400  |
| H | 2.95750500  | 0.02124900  | 1.92640900  |
| C | 5.72343200  | 0.47492400  | 0.62449000  |
| H | 4.53830100  | 1.74338200  | 1.97400900  |
| H | 6.39876400  | 1.06614600  | -0.00150100 |
| H | 6.27075100  | 0.21295700  | 1.53654500  |
| N | 2.11785400  | 0.90528800  | 0.25271900  |
| O | 4.32910600  | 2.43742000  | 0.11951700  |
| C | 2.28620700  | 1.78875600  | -0.77798300 |
| C | 3.68681400  | 2.17712700  | -1.11263600 |
| H | 4.18974400  | 1.37934900  | -1.67712100 |
| H | 3.69414400  | 3.09663500  | -1.69770400 |
| N | 1.15313400  | 2.24445300  | -1.21287900 |
| C | 0.78783300  | 0.76729700  | 0.46058500  |
| N | 0.22469100  | 1.59888800  | -0.43538200 |
| C | -1.17570600 | 1.81136000  | -0.64915300 |
| C | -1.75925400 | 1.30389300  | -1.81193000 |
| C | -1.90205800 | 2.47011700  | 0.34643100  |
| C | -3.14757800 | 1.38655600  | -1.90914400 |

|                            |             |             |             |
|----------------------------|-------------|-------------|-------------|
| C                          | -3.28576000 | 2.52118400  | 0.20165800  |
| C                          | -3.92639200 | 1.95529100  | -0.90143800 |
| H                          | -3.63487000 | 0.97431000  | -2.78973600 |
| H                          | -3.87824000 | 3.00423900  | 0.97472400  |
| C                          | -0.93651700 | 0.72654900  | -2.93302300 |
| H                          | -0.56399700 | 1.52921100  | -3.57667600 |
| H                          | -0.07664100 | 0.16956500  | -2.55968500 |
| H                          | -1.54420000 | 0.04984600  | -3.53754400 |
| C                          | -1.21390400 | 3.08237300  | 1.53858200  |
| H                          | -0.86813100 | 2.32396900  | 2.24997900  |
| H                          | -0.33884500 | 3.66161500  | 1.22994300  |
| H                          | -1.89678800 | 3.74879300  | 2.06805900  |
| C                          | -5.42890100 | 1.92198200  | -0.97798800 |
| H                          | -5.80561200 | 1.04564300  | -0.43838600 |
| H                          | -5.87134700 | 2.81231900  | -0.52472700 |
| H                          | -5.77436800 | 1.85101400  | -2.01185500 |
| O                          | 1.54134300  | 0.14660000  | 3.69334300  |
| H                          | 2.20276700  | 0.83523600  | 3.81396200  |
| H                          | 0.60537600  | 0.49924800  | 2.58794400  |
| <b>Re_TS2<sub>2w</sub></b> |             |             |             |
| C                          | 1.90885100  | 1.02647100  | 0.69806500  |
| C                          | 1.28578500  | 0.09319900  | 1.41736800  |
| C                          | -0.19184700 | -0.19031000 | 1.43152700  |
| H                          | 1.90112800  | -0.49800700 | 2.09438700  |
| O                          | -0.94116600 | 0.95142000  | 1.79212400  |

|    |             |             |             |
|----|-------------|-------------|-------------|
| C  | 3.35625100  | 1.32495100  | 0.74633500  |
| C  | 4.05795000  | 1.13061100  | 1.94202800  |
| C  | 4.05930500  | 1.75195300  | -0.38615300 |
| C  | 5.43235200  | 1.33543300  | 1.99696400  |
| C  | 5.43255500  | 1.95946500  | -0.32724900 |
| H  | 3.51970200  | 1.91760600  | -1.31259700 |
| C  | 6.12594500  | 1.74999700  | 0.86321400  |
| H  | 5.95822500  | 1.18637100  | 2.93446600  |
| H  | 5.96324400  | 2.28815800  | -1.21547400 |
| H  | 3.51712100  | 0.84204900  | 2.83740000  |
| H  | 7.19684000  | 1.91982900  | 0.90903600  |
| Br | 0.88946900  | 2.01287700  | -0.57305500 |
| C  | -5.05934500 | 3.05285700  | -1.13532300 |
| C  | -5.79166600 | 1.91780400  | -0.79559900 |
| C  | -5.13009100 | 0.84394500  | -0.20716800 |
| C  | -3.02096900 | 2.04795700  | -0.29123500 |
| C  | -3.68674700 | 3.11730700  | -0.88541300 |
| H  | -5.56052100 | 3.89581000  | -1.60073300 |
| H  | -6.85910600 | 1.87052100  | -0.99079600 |
| H  | -1.95592500 | 2.08401700  | -0.08118200 |
| H  | -3.13362000 | 4.01185400  | -1.15296300 |
| C  | -3.76090700 | 0.91606400  | 0.03556600  |
| C  | -3.25753200 | -0.35792700 | 0.67700500  |
| C  | -4.46707000 | -1.35875200 | 0.56708700  |
| H  | -2.99111200 | -0.21793100 | 1.72710400  |

|   |             |             |             |
|---|-------------|-------------|-------------|
| C | -5.69713500 | -0.47200600 | 0.26266900  |
| H | -4.57912600 | -1.89962400 | 1.50767400  |
| H | -6.33586600 | -0.96602300 | -0.47641200 |
| H | -6.29677700 | -0.33369900 | 1.16890100  |
| N | -2.08653900 | -0.89033400 | -0.03040300 |
| O | -4.29645000 | -2.38073500 | -0.40639500 |
| C | -2.23793000 | -1.62733500 | -1.17442200 |
| C | -3.63091000 | -1.96849800 | -1.58334000 |
| H | -4.12575100 | -1.10735000 | -2.05482900 |
| H | -3.62296000 | -2.80766100 | -2.27900600 |
| N | -1.10029900 | -2.02697500 | -1.64731000 |
| C | -0.75728900 | -0.79091600 | 0.21767400  |
| N | -0.18198500 | -1.49689200 | -0.77516500 |
| C | 1.22169700  | -1.67374400 | -1.00246200 |
| C | 1.81026700  | -0.99358000 | -2.07271700 |
| C | 1.94433500  | -2.47149300 | -0.11232100 |
| C | 3.19830000  | -1.05118800 | -2.17199900 |
| C | 3.33075500  | -2.49066700 | -0.25590900 |
| C | 3.97428200  | -1.76215500 | -1.25525300 |
| H | 3.68904900  | -0.51220300 | -2.97931700 |
| H | 3.92150100  | -3.08435900 | 0.43750300  |
| C | 0.98777700  | -0.26575500 | -3.10336300 |
| H | 0.59469200  | -0.97474700 | -3.83839700 |
| H | 0.14045000  | 0.25459600  | -2.65441500 |
| H | 1.60175400  | 0.47171000  | -3.62510500 |

|   |             |             |             |
|---|-------------|-------------|-------------|
| C | 1.26261400  | -3.26921800 | 0.96863200  |
| H | 1.04247600  | -2.67876200 | 1.86739500  |
| H | 0.31518200  | -3.68198200 | 0.60847800  |
| H | 1.90024100  | -4.10287000 | 1.27053300  |
| C | 5.47693100  | -1.71347800 | -1.32302700 |
| H | 5.84694900  | -0.87657300 | -0.71981900 |
| H | 5.92342900  | -2.63189700 | -0.93473300 |
| H | 5.82551500  | -1.56484100 | -2.34789600 |
| O | -2.25662100 | -0.17701900 | 3.77019500  |
| O | -0.45343100 | -1.82694400 | 3.47396100  |
| H | -0.34326700 | -1.08212100 | 2.31660100  |
| H | -1.40692900 | 0.72283900  | 2.63931300  |
| H | -2.29327700 | 0.21702600  | 4.64625900  |
| H | -1.51644400 | -0.94070200 | 3.78681200  |
| H | -0.86421800 | -2.67203700 | 3.25274900  |

**Re\_IM2**

|   |             |             |             |
|---|-------------|-------------|-------------|
| C | 2.00048700  | -1.29343100 | -0.88122800 |
| C | 1.21272600  | -0.24392700 | -1.18591200 |
| C | -0.22651400 | -0.20451500 | -1.29856500 |
| H | 1.74558500  | 0.70166600  | -1.26844400 |
| H | -0.66535100 | -2.06006000 | -1.63610800 |
| O | -0.93373900 | -1.19443000 | -1.97755600 |
| C | 3.45939200  | -1.22847400 | -0.73075100 |
| C | 4.18554700  | -0.28973100 | -1.48114500 |
| C | 4.15098300  | -2.01044500 | 0.20461200  |

|    |             |             |             |
|----|-------------|-------------|-------------|
| C  | 5.54995000  | -0.12082700 | -1.27980800 |
| C  | 5.51723800  | -1.84326800 | 0.39725300  |
| H  | 3.60739000  | -2.74465600 | 0.78906800  |
| C  | 6.22521500  | -0.89698600 | -0.34013300 |
| H  | 6.09097000  | 0.60917600  | -1.87368000 |
| H  | 6.03130100  | -2.45727800 | 1.12993700  |
| H  | 3.67690200  | 0.29266600  | -2.24216800 |
| H  | 7.29309400  | -0.77333800 | -0.19232200 |
| Br | 1.14868500  | -2.92691900 | -0.34021900 |
| C  | -4.57348600 | -2.52408000 | 2.10068100  |
| C  | -5.48079200 | -1.71967800 | 1.41624800  |
| C  | -5.01961300 | -0.91798600 | 0.37516000  |
| C  | -2.75909300 | -1.73885700 | 0.70081900  |
| C  | -3.22267900 | -2.53386500 | 1.74576800  |
| H  | -4.91868900 | -3.14951400 | 2.91776500  |
| H  | -6.53092100 | -1.71467300 | 1.69387500  |
| H  | -1.70813400 | -1.74937000 | 0.42485600  |
| H  | -2.52795600 | -3.16768200 | 2.28745000  |
| C  | -3.67146400 | -0.92946000 | 0.02674600  |
| C  | -3.38468600 | 0.03085900  | -1.10744700 |
| C  | -4.75049000 | 0.77599300  | -1.35357900 |
| H  | -3.06318400 | -0.49570100 | -2.00466800 |
| C  | -5.80553800 | 0.01968200  | -0.50599200 |
| H  | -4.99738400 | 0.73929900  | -2.41517700 |
| H  | -6.41155900 | 0.73684600  | 0.05788200  |

|   |             |             |             |
|---|-------------|-------------|-------------|
| H | -6.49222300 | -0.53442200 | -1.15427200 |
| N | -2.33684100 | 0.98543400  | -0.76127800 |
| O | -4.71408800 | 2.16139900  | -1.05940500 |
| C | -2.61878000 | 2.09940300  | -0.00498900 |
| C | -4.05581000 | 2.46697300  | 0.15254800  |
| H | -4.49896200 | 1.91807200  | 0.99790600  |
| H | -4.15710300 | 3.53689500  | 0.33490200  |
| N | -1.56999500 | 2.68954000  | 0.44724100  |
| C | -0.95865500 | 0.80896700  | -0.73356200 |
| N | -0.51804600 | 1.89782300  | 0.00350900  |
| C | 0.78469600  | 2.06937100  | 0.55351300  |
| C | 1.26065300  | 1.15523400  | 1.50263200  |
| C | 1.58292600  | 3.10470400  | 0.05431200  |
| C | 2.59850600  | 1.25324700  | 1.88207100  |
| C | 2.90841200  | 3.17334800  | 0.47716800  |
| C | 3.44079900  | 2.23677100  | 1.36537600  |
| H | 2.99789400  | 0.52775200  | 2.58798200  |
| H | 3.54740600  | 3.96062100  | 0.08429900  |
| C | 0.39553600  | 0.05226400  | 2.05091200  |
| H | -0.66725600 | 0.30062800  | 1.99287100  |
| H | 0.55991300  | -0.87610500 | 1.49130300  |
| H | 0.64881500  | -0.13910200 | 3.09648000  |
| C | 1.01778700  | 4.07300000  | -0.94940900 |
| H | 0.66645200  | 3.54314900  | -1.84110500 |
| H | 0.15559000  | 4.60364000  | -0.53633000 |



|   |            |            |             |
|---|------------|------------|-------------|
| H | 1.77092600 | 4.80290200 | -1.25191200 |
| C | 4.89842200 | 2.26068700 | 1.74433700  |
| H | 5.42529500 | 1.42851100 | 1.26480000  |
| H | 5.37645800 | 3.19142900 | 1.43099300  |
| H | 5.02749800 | 2.15563900 | 2.82507800  |

**TS3(RR)**

|    |             |             |             |
|----|-------------|-------------|-------------|
| H  | -0.53295600 | -1.09023900 | -2.30658500 |
| C  | 1.73466300  | 0.08359200  | -0.72713200 |
| C  | 0.42752900  | 0.58331900  | -0.48362600 |
| C  | -0.73217600 | 0.43831700  | -1.18445800 |
| H  | 0.30988500  | 1.13030000  | 0.44302700  |
| O  | -0.99449400 | -0.23059300 | -2.34147600 |
| C  | 2.86161500  | 0.61264000  | 0.06522400  |
| C  | 2.64433600  | 1.14370400  | 1.35311500  |
| C  | 4.18905900  | 0.54989000  | -0.38895100 |
| C  | 3.69700500  | 1.62858600  | 2.11874700  |
| C  | 5.24102600  | 1.02123200  | 0.38865700  |
| H  | 4.39241400  | 0.12341000  | -1.36471300 |
| C  | 5.00700500  | 1.57707900  | 1.64263300  |
| H  | 3.48865200  | 2.04223600  | 3.10224400  |
| H  | 6.25379300  | 0.95080200  | 0.00398200  |
| H  | 1.64968600  | 1.15068300  | 1.78836700  |
| H  | 5.82830500  | 1.95432300  | 2.24349300  |
| Br | 2.09217600  | -0.16293900 | -2.59967700 |
| C  | -4.32916000 | -2.14806900 | 2.90145600  |

|   |             |             |             |
|---|-------------|-------------|-------------|
| C | -5.36065700 | -2.05292000 | 1.96826700  |
| C | -5.09152400 | -1.49035100 | 0.72237100  |
| C | -2.76720400 | -1.14338500 | 1.34793500  |
| C | -3.04236900 | -1.69810900 | 2.59450800  |
| H | -4.52789000 | -2.58332100 | 3.87600800  |
| H | -6.35858500 | -2.40601900 | 2.21199200  |
| H | -1.74896800 | -0.84201800 | 1.11144100  |
| H | -2.23362800 | -1.80000500 | 3.31096700  |
| C | -3.80642800 | -1.04630100 | 0.42782200  |
| C | -3.74036500 | -0.45302700 | -0.96145500 |
| C | -5.23407100 | -0.36463900 | -1.42475100 |
| H | -3.11446900 | -1.04999500 | -1.63003400 |
| C | -6.01802400 | -1.27695100 | -0.45011900 |
| H | -5.33009400 | -0.69773400 | -2.45822400 |
| H | -6.96942500 | -0.80583100 | -0.18219500 |
| H | -6.25433100 | -2.22911300 | -0.93668900 |
| N | -3.16506300 | 0.89595500  | -0.87122300 |
| O | -5.73838800 | 0.96723400  | -1.44846500 |
| C | -3.89553600 | 1.93928800  | -0.37774300 |
| C | -5.38035000 | 1.76439700  | -0.34215800 |
| H | -5.67888100 | 1.30492300  | 0.61210400  |
| H | -5.88093000 | 2.72802500  | -0.44397900 |
| N | -3.13900400 | 2.92909600  | -0.00909900 |
| C | -1.86551700 | 1.23619800  | -0.76628300 |
| N | -1.86868700 | 2.48566900  | -0.26444300 |

|   |             |             |             |
|---|-------------|-------------|-------------|
| C | -0.71806600 | 3.28241200  | 0.06589700  |
| C | -0.47056000 | 3.50921000  | 1.42601200  |
| C | 0.16350500  | 3.67515300  | -0.94493500 |
| C | 0.70830400  | 4.16812900  | 1.76249100  |
| C | 1.33400400  | 4.32132700  | -0.54731200 |
| C | 1.62998200  | 4.56456700  | 0.79180200  |
| H | 0.92930600  | 4.34443100  | 2.81246600  |
| H | 2.04680600  | 4.61823500  | -1.31297200 |
| C | -1.40429800 | 2.98697100  | 2.48697500  |
| H | -0.97561800 | 3.14463100  | 3.47788300  |
| H | -2.37813500 | 3.48106100  | 2.44315900  |
| H | -1.57898700 | 1.91086700  | 2.36089000  |
| C | -0.04421400 | 3.34050100  | -2.39788800 |
| H | 0.53555400  | 2.44573200  | -2.65602900 |
| H | -1.09120900 | 3.14481100  | -2.63890300 |
| H | 0.30447700  | 4.16294000  | -3.02648000 |
| C | 2.94572300  | 5.17927200  | 1.18622100  |
| H | 3.70584300  | 4.39504400  | 1.27788200  |
| H | 3.29151400  | 5.89499500  | 0.43681100  |
| H | 2.87342900  | 5.69224100  | 2.14809500  |
| N | 0.35482100  | -2.42870600 | -1.01274300 |
| C | -0.85737100 | -2.89233300 | -0.62107000 |
| O | -1.87316500 | -2.81187600 | -1.30321900 |
| O | -0.84571100 | -3.59989100 | 0.53999400  |
| C | -2.02252600 | -4.35829100 | 0.78764100  |

|   |             |             |             |
|---|-------------|-------------|-------------|
| H | -1.90581200 | -4.77044600 | 1.79032300  |
| H | -2.91769100 | -3.73610900 | 0.73661500  |
| H | -2.11039500 | -5.16678800 | 0.05561300  |
| C | 5.42090600  | -3.12894400 | -0.17268800 |
| C | 4.77272700  | -3.26268100 | -1.39973600 |
| C | 3.41342000  | -2.96155500 | -1.52289900 |
| C | 2.73714800  | -2.50225100 | -0.40389100 |
| C | 3.39701800  | -2.39054400 | 0.82882400  |
| C | 4.73951000  | -2.69810900 | 0.97007300  |
| H | 6.47608300  | -3.37219000 | -0.09648800 |
| H | 5.32729300  | -3.61397000 | -2.26335400 |
| H | 2.88630300  | -3.06680000 | -2.46440700 |
| H | 5.24376100  | -2.60371500 | 1.92605900  |
| C | 1.34101100  | -2.10170000 | -0.20055000 |
| C | 1.24603400  | -1.73968000 | 1.28087900  |
| O | 0.30295700  | -1.26248300 | 1.89164300  |
| N | 2.49932100  | -1.95516200 | 1.80935600  |
| C | 2.86349100  | -1.63424700 | 3.16691400  |
| H | 3.15300300  | -2.53676900 | 3.71461300  |
| H | 3.69062100  | -0.91716300 | 3.17517900  |
| H | 1.98818800  | -1.18588400 | 3.63889000  |

**TS3(RS)**

|   |             |             |             |
|---|-------------|-------------|-------------|
| H | -1.01101500 | -1.73673200 | -1.87441600 |
| C | 1.52612100  | -0.23488300 | -0.63446000 |
| C | 0.21669400  | 0.29234600  | -0.35283100 |

|    |             |             |             |
|----|-------------|-------------|-------------|
| C  | -1.00552800 | 0.02776000  | -0.89072300 |
| H  | 0.19637000  | 1.02773700  | 0.44238700  |
| O  | -1.42022400 | -0.79895300 | -1.86737600 |
| C  | 2.67714200  | 0.61825500  | -0.22811800 |
| C  | 2.63599000  | 1.32512500  | 0.98825100  |
| C  | 3.85751400  | 0.70527500  | -0.98597000 |
| C  | 3.71303700  | 2.09770100  | 1.40925800  |
| C  | 4.93057900  | 1.48054800  | -0.56128500 |
| H  | 3.92436200  | 0.16250300  | -1.92044400 |
| C  | 4.86849100  | 2.18783800  | 0.63744500  |
| H  | 3.64259300  | 2.62639200  | 2.35605600  |
| H  | 5.82428900  | 1.52705100  | -1.17637400 |
| H  | 1.76630200  | 1.26236600  | 1.63724100  |
| H  | 5.70649900  | 2.79513000  | 0.96545900  |
| Br | 1.63380800  | -0.87503300 | -2.45734500 |
| C  | -3.69335400 | -2.90024700 | 2.76082400  |
| C  | -4.78226600 | -2.05108900 | 2.56411200  |
| C  | -4.84835700 | -1.30967400 | 1.39144100  |
| C  | -2.77286500 | -2.29426400 | 0.60159800  |
| C  | -2.70040000 | -3.02259400 | 1.78876100  |
| H  | -3.62531300 | -3.48037400 | 3.67588200  |
| H  | -5.56492900 | -1.97236800 | 3.31301000  |
| H  | -2.00548300 | -2.41971800 | -0.15090900 |
| H  | -1.85213500 | -3.68269300 | 1.94088300  |
| C  | -3.84262200 | -1.42546800 | 0.42719100  |

|   |             |             |             |
|---|-------------|-------------|-------------|
| C | -4.13033400 | -0.51641500 | -0.74552700 |
| C | -5.64136100 | -0.21178500 | -0.56022500 |
| H | -3.87777900 | -0.94170000 | -1.71661700 |
| C | -5.91190100 | -0.33622100 | 0.95501500  |
| H | -6.18438900 | -1.00309800 | -1.08150700 |
| H | -5.79002200 | 0.62352300  | 1.47130400  |
| H | -6.92982200 | -0.68019900 | 1.15386500  |
| N | -3.39939300 | 0.77479300  | -0.64284900 |
| O | -6.06083100 | 0.99000500  | -1.17249000 |
| C | -4.00583400 | 1.99478600  | -0.50994700 |
| C | -5.49310600 | 2.14866600  | -0.61403800 |
| H | -5.91891500 | 2.38768200  | 0.36885800  |
| H | -5.71703300 | 2.97708300  | -1.28889000 |
| N | -3.13645100 | 2.94703800  | -0.34417300 |
| C | -2.06398000 | 0.98848200  | -0.57706100 |
| N | -1.93017200 | 2.31526100  | -0.39642500 |
| C | -0.71647700 | 3.09183700  | -0.34511600 |
| C | -0.35482200 | 3.63693000  | 0.89030700  |
| C | 0.07041600  | 3.20934600  | -1.49409700 |
| C | 0.84766600  | 4.33508100  | 0.95631100  |
| C | 1.26871800  | 3.91111900  | -1.36686600 |
| C | 1.67614200  | 4.47188400  | -0.15802100 |
| H | 1.16099800  | 4.75283100  | 1.90996100  |
| H | 1.91522700  | 3.99295600  | -2.23737200 |
| C | -1.20468600 | 3.41109400  | 2.11273100  |

|   |             |             |             |
|---|-------------|-------------|-------------|
| H | -0.74688700 | 3.87657300  | 2.98677800  |
| H | -2.20889400 | 3.82326600  | 1.98220600  |
| H | -1.31148600 | 2.33889100  | 2.31887900  |
| C | -0.27429500 | 2.54355800  | -2.79863600 |
| H | 0.25110300  | 1.58372700  | -2.87263500 |
| H | -1.34476300 | 2.34998900  | -2.90227900 |
| H | 0.04212500  | 3.16927400  | -3.63591600 |
| C | 2.99027100  | 5.20023100  | -0.06246500 |
| H | 3.76963700  | 4.65744000  | -0.60302700 |
| H | 2.91134000  | 6.20390500  | -0.49303300 |
| H | 3.30958500  | 5.30123000  | 0.97737800  |
| N | 0.32876100  | -2.63737000 | 0.00109600  |
| C | 0.30052500  | -3.35598400 | -1.13358100 |
| O | -0.61241000 | -3.22526500 | -1.97189900 |
| O | 1.24720500  | -4.28719500 | -1.29043200 |
| C | 1.43629500  | -4.75085500 | -2.62203900 |
| H | 2.23537400  | -5.48876200 | -2.56868800 |
| H | 0.52015100  | -5.19465300 | -3.01580000 |
| H | 1.74139800  | -3.91263000 | -3.25516300 |
| C | 1.98506000  | -0.43192500 | 4.31161700  |
| C | 0.66109400  | -0.54090100 | 3.88034400  |
| C | 0.36904100  | -1.09156100 | 2.62898100  |
| C | 1.42125000  | -1.50653200 | 1.82983400  |
| C | 2.74379600  | -1.40079300 | 2.27422700  |
| C | 3.05003300  | -0.86616200 | 3.51914100  |

|   |             |             |             |
|---|-------------|-------------|-------------|
| H | 2.19428100  | -0.00411500 | 5.28743100  |
| H | -0.14367100 | -0.20563200 | 4.52668500  |
| H | -0.65027200 | -1.18954200 | 2.26479200  |
| H | 4.07718200  | -0.77246300 | 3.85555800  |
| C | 1.43105300  | -2.04623400 | 0.45717100  |
| C | 2.91716600  | -2.30756000 | 0.16079000  |
| O | 3.45849300  | -2.69927900 | -0.84962400 |
| N | 3.60638900  | -1.87588300 | 1.29406300  |
| C | 5.03728800  | -1.69162900 | 1.31121200  |
| H | 5.27950500  | -0.63039500 | 1.44305500  |
| H | 5.49799100  | -2.27608500 | 2.11403300  |
| H | 5.41624000  | -2.03414200 | 0.34769800  |

**TS3(SR)**

|   |             |             |             |
|---|-------------|-------------|-------------|
| H | 1.33080700  | -1.37770400 | -1.63599200 |
| C | -1.76370500 | -0.51801400 | -0.83473700 |
| C | -0.71411000 | 0.44500200  | -0.59764700 |
| C | 0.60961600  | 0.36875100  | -0.89235900 |
| H | -0.96545500 | 1.22107300  | 0.11909300  |
| O | 1.32647400  | -0.34459600 | -1.77660800 |
| C | -3.17718000 | -0.08413100 | -0.62156100 |
| C | -3.48713000 | 0.83258000  | 0.39892600  |
| C | -4.24651700 | -0.63752900 | -1.34329800 |
| C | -4.80333100 | 1.19418500  | 0.66566800  |
| C | -5.56023500 | -0.26915400 | -1.07619400 |
| H | -4.03940600 | -1.36266100 | -2.12045300 |



|    |             |             |             |
|----|-------------|-------------|-------------|
| C  | -5.85052800 | 0.65314600  | -0.07421600 |
| H  | -5.00525600 | 1.90031400  | 1.46535900  |
| H  | -6.36229500 | -0.71086100 | -1.65947300 |
| H  | -2.70477900 | 1.25163800  | 1.02536500  |
| H  | -6.87649000 | 0.94203000  | 0.13012400  |
| Br | -1.48043900 | -1.50199900 | -2.47638800 |
| C  | 6.82328200  | -1.11468400 | -1.34109700 |
| C  | 6.64506900  | -1.47764100 | -0.00819500 |
| C  | 5.39714500  | -1.28808300 | 0.57791400  |
| C  | 4.51623700  | -0.39224300 | -1.50236700 |
| C  | 5.76796400  | -0.57941000 | -2.08300900 |
| H  | 7.79223800  | -1.25311700 | -1.81004000 |
| H  | 7.46659900  | -1.89890700 | 0.56362300  |
| H  | 3.67641000  | 0.00028300  | -2.06847700 |
| H  | 5.92355000  | -0.31355300 | -3.12333500 |
| C  | 4.35300300  | -0.74542100 | -0.16685000 |
| C  | 3.10097600  | -0.62480800 | 0.67158300  |
| C  | 3.57638100  | -0.93038600 | 2.13818100  |
| H  | 2.30764000  | -1.31573900 | 0.36647200  |
| C  | 4.94961200  | -1.62066200 | 1.97953200  |
| H  | 2.84405500  | -1.56830100 | 2.63461500  |
| H  | 5.63422100  | -1.27021500 | 2.75804600  |
| H  | 4.84324200  | -2.70358900 | 2.10283100  |
| N  | 2.54519200  | 0.72908300  | 0.61057100  |
| O  | 3.65493700  | 0.22410800  | 2.96926600  |

|   |             |            |             |
|---|-------------|------------|-------------|
| C | 3.05427200  | 1.76129100 | 1.34706100  |
| C | 4.11818200  | 1.39881900 | 2.33007700  |
| H | 5.08356000  | 1.24362100 | 1.82933900  |
| H | 4.21920500  | 2.17717500 | 3.08608300  |
| N | 2.37308100  | 2.85551400 | 1.17342500  |
| C | 1.47364800  | 1.19958900 | -0.05093500 |
| N | 1.39805900  | 2.49317700 | 0.27981200  |
| C | 0.47446400  | 3.45567700 | -0.25076100 |
| C | 0.58011600  | 3.79755400 | -1.60108700 |
| C | -0.49471600 | 3.98479300 | 0.60452100  |
| C | -0.34155300 | 4.71903700 | -2.09391000 |
| C | -1.38948600 | 4.90262300 | 0.06053500  |
| C | -1.33078000 | 5.27598600 | -1.28313100 |
| H | -0.28489900 | 5.00648000 | -3.14060500 |
| H | -2.15740100 | 5.32884700 | 0.70096500  |
| C | 1.63213200  | 3.18668200 | -2.48934300 |
| H | 2.61297100  | 3.18836200 | -2.00334600 |
| H | 1.38666400  | 2.14843600 | -2.73985300 |
| H | 1.71282600  | 3.74835800 | -3.42123600 |
| C | -0.56984600 | 3.56192700 | 2.04707100  |
| H | -0.59572300 | 2.46998100 | 2.14258200  |
| H | 0.30198000  | 3.91459500 | 2.60565600  |
| H | -1.47084100 | 3.96051300 | 2.51637500  |
| C | -2.33972900 | 6.23717100 | -1.85504600 |
| H | -2.67172500 | 6.95668600 | -1.10327600 |

|   |             |             |             |
|---|-------------|-------------|-------------|
| H | -1.92539400 | 6.78897600  | -2.70159200 |
| H | -3.22282000 | 5.69675400  | -2.21043800 |
| N | 0.09338400  | -2.15463700 | 0.32682700  |
| C | 0.47989200  | -3.03697300 | -0.59689300 |
| O | 1.45281500  | -2.81159500 | -1.35572200 |
| O | -0.15009900 | -4.21629300 | -0.63489800 |
| C | -0.04219100 | -4.93849700 | -1.85490700 |
| H | -0.50269000 | -4.35535600 | -2.65766300 |
| H | 1.00144600  | -5.14450700 | -2.09835300 |
| H | -0.59722600 | -5.86293700 | -1.70276600 |
| C | -2.52141900 | -0.01255700 | 4.13818500  |
| C | -1.20953900 | 0.26582900  | 3.75205500  |
| C | -0.67378100 | -0.32361500 | 2.60123700  |
| C | -1.47371800 | -1.16992300 | 1.85328800  |
| C | -2.77533300 | -1.46912700 | 2.27150700  |
| C | -3.32467100 | -0.89387500 | 3.41024300  |
| H | -2.92467800 | 0.45275100  | 5.03217600  |
| H | -0.60035400 | 0.93301700  | 4.35357900  |
| H | 0.35304000  | -0.13629600 | 2.29275200  |
| H | -4.34017100 | -1.11635500 | 3.72017400  |
| C | -1.20307000 | -1.88785500 | 0.58897500  |
| C | -2.47108900 | -2.73395000 | 0.36514900  |
| O | -2.77551300 | -3.47498400 | -0.54259400 |
| N | -3.34571100 | -2.37855200 | 1.39276800  |
| C | -4.73648200 | -2.76095000 | 1.39975500  |

|                |             |             |             |
|----------------|-------------|-------------|-------------|
| H              | -4.97752500 | -3.34887200 | 2.29125800  |
| H              | -5.37095600 | -1.86848100 | 1.36329200  |
| H              | -4.90706300 | -3.36463600 | 0.50780100  |
| <b>TS3(SS)</b> |             |             |             |
| H              | 0.75010000  | -1.93185600 | -0.64832600 |
| C              | -1.67148100 | -0.39083800 | -0.95303300 |
| C              | -0.49325500 | 0.34394600  | -0.59122000 |
| C              | 0.80234200  | -0.06485500 | -0.57183500 |
| H              | -0.68514600 | 1.26828400  | -0.06838000 |
| O              | 1.30948100  | -1.23514600 | -1.05764500 |
| C              | -2.96005900 | 0.33859500  | -1.09100900 |
| C              | -3.12092700 | 1.64636500  | -0.59496400 |
| C              | -4.09132000 | -0.28873300 | -1.63814900 |
| C              | -4.34678000 | 2.29668100  | -0.66688200 |
| C              | -5.31764200 | 0.36423600  | -1.70150800 |
| H              | -4.00325400 | -1.30020800 | -2.02039600 |
| C              | -5.45592200 | 1.66490200  | -1.22496700 |
| H              | -4.43022000 | 3.30725300  | -0.27597700 |
| H              | -6.16962700 | -0.15320900 | -2.13189000 |
| H              | -2.29400700 | 2.17855300  | -0.14044300 |
| H              | -6.41101600 | 2.17689600  | -1.28614500 |
| Br             | -1.39091800 | -1.68662700 | -2.35890800 |
| C              | 6.59033700  | -1.62967700 | -2.68837300 |
| C              | 6.87027000  | -1.85709000 | -1.34241900 |
| C              | 5.88007100  | -1.60425100 | -0.39787000 |

|   |            |             |             |
|---|------------|-------------|-------------|
| C | 4.33982100 | -0.91822100 | -2.14640200 |
| C | 5.33500100 | -1.16706000 | -3.08853100 |
| H | 7.35574100 | -1.81528100 | -3.43525200 |
| H | 7.84670800 | -2.22081400 | -1.03596500 |
| H | 3.35107900 | -0.58142300 | -2.44490200 |
| H | 5.13259400 | -1.00464800 | -4.14214700 |
| C | 4.63346700 | -1.13450000 | -0.80488300 |
| C | 3.72379400 | -0.93976800 | 0.38423500  |
| C | 4.66382600 | -1.06632500 | 1.63309800  |
| H | 2.93292800 | -1.68034100 | 0.45743500  |
| C | 5.92166100 | -1.79104500 | 1.09962800  |
| H | 4.14225200 | -1.62540800 | 2.40974100  |
| H | 6.81797700 | -1.37707500 | 1.57136300  |
| H | 5.88161600 | -2.85589100 | 1.35438400  |
| N | 3.07464500 | 0.37568800  | 0.35857200  |
| O | 4.99907600 | 0.17078400  | 2.25132600  |
| C | 3.75271100 | 1.47970900  | 0.79154600  |
| C | 5.11051300 | 1.26831900  | 1.37209700  |
| H | 5.85153000 | 1.09099800  | 0.57954400  |
| H | 5.40533400 | 2.14130600  | 1.95459500  |
| N | 3.02135700 | 2.55027000  | 0.73527000  |
| C | 1.83632400 | 0.78104600  | -0.00368200 |
| N | 1.83315900 | 2.10967300  | 0.22265500  |
| C | 0.77134600 | 3.05671800  | 0.02422600  |
| C | 0.53188500 | 3.53472500  | -1.26647100 |

|   |             |             |             |
|---|-------------|-------------|-------------|
| C | 0.01946900  | 3.43108200  | 1.13909500  |
| C | -0.51974700 | 4.43170700  | -1.42503200 |
| C | -1.01664300 | 4.34263600  | 0.92700000  |
| C | -1.30046700 | 4.84638000  | -0.34205700 |
| H | -0.73968100 | 4.81347600  | -2.41908800 |
| H | -1.62527800 | 4.64710600  | 1.77436100  |
| C | 1.35227500  | 3.05240200  | -2.43144800 |
| H | 2.42298600  | 3.11511100  | -2.21517500 |
| H | 1.11438600  | 2.00639300  | -2.65695300 |
| H | 1.14311000  | 3.64655700  | -3.32223600 |
| C | 0.29444800  | 2.82172900  | 2.48640700  |
| H | 0.13664000  | 1.73769500  | 2.44524800  |
| H | 1.32336400  | 3.01632800  | 2.80240300  |
| H | -0.38914700 | 3.22568000  | 3.23439200  |
| C | -2.43667400 | 5.81135300  | -0.56094800 |
| H | -2.98265900 | 5.99915100  | 0.36593300  |
| H | -2.06766500 | 6.76989100  | -0.93783900 |
| H | -3.14019500 | 5.41623300  | -1.29982000 |
| N | -0.42088900 | -2.05739200 | 0.93129500  |
| C | 0.27657700  | -1.70131800 | 2.03678700  |
| O | 1.47840600  | -1.44519300 | 2.08286200  |
| O | -0.46035900 | -1.75447400 | 3.17944900  |
| C | 0.15758100  | -1.18961000 | 4.32291400  |
| H | 1.11001600  | -1.68006800 | 4.53487500  |
| H | 0.33277700  | -0.11984900 | 4.17255900  |

|   |             |             |             |
|---|-------------|-------------|-------------|
| H | -0.54123100 | -1.33836600 | 5.14602600  |
| C | -5.24644000 | -3.76576200 | -0.01765600 |
| C | -4.07639200 | -4.34469800 | -0.50810900 |
| C | -2.83748200 | -3.73790100 | -0.28634400 |
| C | -2.80244400 | -2.54227600 | 0.41288100  |
| C | -3.98460900 | -1.98303300 | 0.92012300  |
| C | -5.22031100 | -2.57606000 | 0.71581900  |
| H | -6.19996200 | -4.25219900 | -0.19839600 |
| H | -4.12959700 | -5.27648100 | -1.06081300 |
| H | -1.91553400 | -4.17244800 | -0.65626700 |
| H | -6.13081000 | -2.13435400 | 1.10698600  |
| C | -1.69186800 | -1.65930600 | 0.79581400  |
| C | -2.34410500 | -0.55028600 | 1.62071900  |
| O | -1.81826900 | 0.44547700  | 2.09095300  |
| N | -3.69335300 | -0.81453900 | 1.63082900  |
| C | -4.68276600 | 0.11225200  | 2.12442000  |
| H | -5.35905000 | 0.40565800  | 1.31464200  |
| H | -5.25717400 | -0.33206500 | 2.94354200  |
| H | -4.14718200 | 0.99084800  | 2.48614000  |

**IM3(RR)**

|   |             |             |             |
|---|-------------|-------------|-------------|
| H | 0.00428400  | -1.54878400 | -1.66400400 |
| C | 1.53214700  | 0.19855600  | -0.65548300 |
| C | 0.16305500  | 0.72828900  | -0.40441800 |
| C | -0.95503600 | 0.44135900  | -1.14017500 |
| H | 0.08043000  | 1.47489900  | 0.36686500  |

|    |             |             |             |
|----|-------------|-------------|-------------|
| O  | -1.15114500 | -0.34223800 | -2.11911600 |
| C  | 2.59704900  | 0.99726400  | 0.10584600  |
| C  | 2.30871400  | 1.48712500  | 1.38735400  |
| C  | 3.88920600  | 1.18470400  | -0.39352800 |
| C  | 3.27252000  | 2.16457400  | 2.12947800  |
| C  | 4.85440600  | 1.85420600  | 0.35201600  |
| H  | 4.13746500  | 0.81054500  | -1.37951100 |
| C  | 4.55142000  | 2.35484400  | 1.61406600  |
| H  | 3.01649000  | 2.53904200  | 3.11648300  |
| H  | 5.84861100  | 1.98473500  | -0.06312400 |
| H  | 1.33560500  | 1.31247100  | 1.83430000  |
| H  | 5.30440400  | 2.88250200  | 2.19136100  |
| Br | 1.86660100  | 0.39796900  | -2.64232000 |
| C  | -3.57646300 | -3.23238200 | 2.56169300  |
| C  | -4.74917600 | -3.10124100 | 1.82133700  |
| C  | -4.73752500 | -2.30782400 | 0.67614900  |
| C  | -2.38431000 | -1.79973700 | 1.01723000  |
| C  | -2.40254800 | -2.58589500 | 2.16513700  |
| H  | -3.57675500 | -3.84499200 | 3.45807600  |
| H  | -5.65761600 | -3.60874500 | 2.13311900  |
| H  | -1.46096500 | -1.30608400 | 0.72362000  |
| H  | -1.48694700 | -2.68445300 | 2.74019200  |
| C  | -3.56358400 | -1.66919600 | 0.29052600  |
| C  | -3.76234600 | -0.85804900 | -0.96669800 |
| C  | -5.29343400 | -0.99037500 | -1.29604100 |



|   |             |             |             |
|---|-------------|-------------|-------------|
| H | -3.11286400 | -1.18292400 | -1.78128100 |
| C | -5.85938200 | -2.02893800 | -0.29248200 |
| H | -5.40995000 | -1.33014100 | -2.32518100 |
| H | -6.76069500 | -1.63148400 | 0.18776200  |
| H | -6.16052200 | -2.93910400 | -0.82043800 |
| N | -3.41814500 | 0.55341800  | -0.70983300 |
| O | -5.99884800 | 0.24394200  | -1.26669000 |
| C | -4.30784600 | 1.44985100  | -0.19373100 |
| C | -5.73987600 | 1.03206200  | -0.12746100 |
| H | -5.92518600 | 0.47742200  | 0.80491100  |
| H | -6.39429300 | 1.90359700  | -0.15837100 |
| N | -3.72747600 | 2.56582200  | 0.13879600  |
| C | -2.20317800 | 1.12725300  | -0.66560400 |
| N | -2.41013300 | 2.34855100  | -0.16115900 |
| C | -1.39958800 | 3.31230600  | 0.18261300  |
| C | -1.13922800 | 3.49398100  | 1.54651600  |
| C | -0.63513000 | 3.89940000  | -0.82641300 |
| C | -0.07562900 | 4.32236500  | 1.88987500  |
| C | 0.41833400  | 4.72134700  | -0.42436300 |
| C | 0.72079000  | 4.93324400  | 0.91857900  |
| H | 0.15672000  | 4.46949200  | 2.94197600  |
| H | 1.04046600  | 5.17856000  | -1.18981600 |
| C | -1.92332000 | 2.74879500  | 2.59483100  |
| H | -1.48823200 | 2.91378000  | 3.58176100  |
| H | -2.96914500 | 3.06537400  | 2.61546900  |

|   |             |             |             |
|---|-------------|-------------|-------------|
| H | -1.90803700 | 1.67009900  | 2.39427700  |
| C | -0.83080800 | 3.58182900  | -2.28380800 |
| H | -0.18327100 | 2.73971800  | -2.55925400 |
| H | -1.86236800 | 3.30851700  | -2.51668000 |
| H | -0.55365900 | 4.43977200  | -2.89975400 |
| C | 1.92627100  | 5.74251400  | 1.31639900  |
| H | 2.80115300  | 5.08702400  | 1.39329500  |
| H | 2.14974900  | 6.51395600  | 0.57613900  |
| H | 1.78080200  | 6.22390600  | 2.28632200  |
| N | 0.62429500  | -2.06337500 | -1.01724500 |
| C | 0.17258200  | -3.28723800 | -0.64271400 |
| O | -0.81308600 | -3.83467400 | -1.08870600 |
| O | 0.97163100  | -3.84488300 | 0.30341300  |
| C | 0.49669700  | -5.08973500 | 0.80053200  |
| H | 1.22069200  | -5.40593700 | 1.55097800  |
| H | -0.49413200 | -4.96997600 | 1.24571600  |
| H | 0.43293300  | -5.82467900 | -0.00445300 |
| C | 5.71131800  | -2.70260700 | -0.38114000 |
| C | 5.08757100  | -2.60878000 | -1.62124500 |
| C | 3.75397500  | -2.19261100 | -1.71845200 |
| C | 3.07435000  | -1.87253800 | -0.55912000 |
| C | 3.70228000  | -2.01190000 | 0.68149800  |
| C | 5.02278900  | -2.41139700 | 0.80055700  |
| H | 6.74783100  | -3.02003700 | -0.32444500 |
| H | 5.63843800  | -2.86119500 | -2.52085300 |

|   |            |             |             |
|---|------------|-------------|-------------|
| H | 3.25929500 | -2.10349400 | -2.67894400 |
| H | 5.50182600 | -2.50308800 | 1.76966300  |
| C | 1.67094400 | -1.34680200 | -0.33757000 |
| C | 1.55396400 | -1.43444200 | 1.22081200  |
| O | 0.56442100 | -1.21965800 | 1.89239600  |
| N | 2.80114900 | -1.71410600 | 1.71002600  |
| C | 3.12020600 | -1.72077900 | 3.11495500  |
| H | 3.47664500 | -2.70694000 | 3.42949700  |
| H | 3.88878600 | -0.97072800 | 3.32981300  |
| H | 2.20628900 | -1.47404400 | 3.65593100  |

**IM3(RS)**

|   |             |             |             |
|---|-------------|-------------|-------------|
| H | 0.14919200  | -1.36163200 | -1.89042700 |
| C | 1.40517000  | 0.33629800  | -0.49324200 |
| C | -0.00633700 | 0.55153800  | -0.05590800 |
| C | -1.13064200 | 0.29956000  | -0.79412700 |
| H | -0.12450400 | 1.17660600  | 0.81647400  |
| O | -1.33418100 | -0.31839300 | -1.88592500 |
| C | 2.38531100  | 1.11175100  | 0.39734700  |
| C | 2.16683500  | 1.15703400  | 1.78026200  |
| C | 3.53696500  | 1.72386300  | -0.10728200 |
| C | 3.05620600  | 1.81235000  | 2.62656200  |
| C | 4.43068700  | 2.37179100  | 0.74107700  |
| H | 3.73327900  | 1.69217500  | -1.17243500 |
| C | 4.19254700  | 2.42720900  | 2.11097500  |
| H | 2.86016900  | 1.82995900  | 3.69417900  |

|    |             |             |             |
|----|-------------|-------------|-------------|
| H  | 5.31601500  | 2.83966900  | 0.32131900  |
| H  | 1.30728800  | 0.65373300  | 2.21105300  |
| H  | 4.88807600  | 2.93806600  | 2.76994300  |
| Br | 1.53523100  | 1.06094000  | -2.37555300 |
| C  | -2.70962400 | -4.14867400 | 1.51303400  |
| C  | -3.84681700 | -3.41744200 | 1.86045700  |
| C  | -4.21581400 | -2.34042500 | 1.06521100  |
| C  | -2.32918100 | -2.73564300 | -0.42057000 |
| C  | -1.97173600 | -3.82485300 | 0.37423700  |
| H  | -2.41452900 | -4.99891700 | 2.12020100  |
| H  | -4.44455900 | -3.70166600 | 2.72149000  |
| H  | -1.76261600 | -2.49221500 | -1.31252300 |
| H  | -1.11475100 | -4.42218900 | 0.07929400  |
| C  | -3.43946600 | -1.98706200 | -0.04465400 |
| C  | -4.08506600 | -0.82954800 | -0.76933800 |
| C  | -5.55327400 | -0.95730300 | -0.29869100 |
| H  | -3.94618000 | -0.84872100 | -1.85066100 |
| C  | -5.44386900 | -1.46699700 | 1.15636100  |
| H  | -6.01501100 | -1.73730800 | -0.90862400 |
| H  | -5.28579500 | -0.63942700 | 1.86006200  |
| H  | -6.34220600 | -2.00164100 | 1.47306800  |
| N  | -3.61689800 | 0.50597000  | -0.30642600 |
| O  | -6.33459000 | 0.19695300  | -0.52005100 |
| C  | -4.44537300 | 1.52509900  | 0.08700200  |
| C  | -5.92594600 | 1.33100200  | 0.20379700  |

|   |             |            |             |
|---|-------------|------------|-------------|
| H | -6.20333300 | 1.25957400 | 1.26446700  |
| H | -6.43918700 | 2.19443900 | -0.22351000 |
| N | -3.77603500 | 2.61113100 | 0.35078200  |
| C | -2.36270900 | 0.99206800 | -0.27982200 |
| N | -2.48097100 | 2.26496600 | 0.10935900  |
| C | -1.38990400 | 3.20328700 | 0.18529300  |
| C | -0.90352100 | 3.54751200 | 1.44645300  |
| C | -0.75460000 | 3.54588500 | -1.01011400 |
| C | 0.30093100  | 4.24489900 | 1.49331400  |
| C | 0.46285400  | 4.21398500 | -0.90522900 |
| C | 1.00957200  | 4.55688000 | 0.33169200  |
| H | 0.72224800  | 4.50428800 | 2.46143500  |
| H | 1.01032900  | 4.44393300 | -1.81539300 |
| C | -1.61030200 | 3.09521700 | 2.69641500  |
| H | -1.06880700 | 3.42658400 | 3.58385700  |
| H | -2.63039400 | 3.48655000 | 2.74218200  |
| H | -1.67878300 | 2.00093600 | 2.73088200  |
| C | -1.32571500 | 3.15453600 | -2.34703300 |
| H | -1.18729500 | 2.08703800 | -2.54836100 |
| H | -2.39528000 | 3.38296000 | -2.39610600 |
| H | -0.82074500 | 3.70497500 | -3.14267400 |
| C | 2.33984100  | 5.25773400 | 0.40932900  |
| H | 2.82788300  | 5.06456800 | 1.36744900  |
| H | 3.00599500  | 4.90857300 | -0.38336800 |
| H | 2.21752300  | 6.34046800 | 0.29785000  |

|   |             |             |             |
|---|-------------|-------------|-------------|
| N | 0.94704400  | -1.86893400 | -1.48389600 |
| C | 0.97609600  | -3.20933000 | -1.66550300 |
| O | 0.11454700  | -3.86438400 | -2.22234300 |
| O | 2.09867100  | -3.75536500 | -1.14034100 |
| C | 2.19076400  | -5.16677800 | -1.27807700 |
| H | 3.14167700  | -5.44611600 | -0.82605300 |
| H | 1.36461500  | -5.66027900 | -0.76027800 |
| H | 2.16611600  | -5.45246300 | -2.33136700 |
| C | 2.35399400  | -2.69316200 | 3.38589400  |
| C | 1.03554700  | -2.52045300 | 2.97539100  |
| C | 0.75208200  | -2.03952300 | 1.68998900  |
| C | 1.80421400  | -1.74720800 | 0.84612900  |
| C | 3.12395000  | -1.95221900 | 1.25871000  |
| C | 3.42544900  | -2.41470600 | 2.53021300  |
| H | 2.56045200  | -3.05978100 | 4.38679700  |
| H | 0.22102000  | -2.75992900 | 3.65107900  |
| H | -0.26952500 | -1.88572400 | 1.35616800  |
| H | 4.45208700  | -2.56025800 | 2.84941300  |
| C | 1.81533000  | -1.18181000 | -0.56286100 |
| C | 3.32631700  | -1.29566200 | -0.93212000 |
| O | 3.83973200  | -1.07653000 | -2.00193700 |
| N | 4.00193400  | -1.64002800 | 0.22349400  |
| C | 5.43666600  | -1.74726200 | 0.29312200  |
| H | 5.83600000  | -1.05567800 | 1.04221000  |
| H | 5.74039900  | -2.76876400 | 0.54591000  |

|                |             |             |             |
|----------------|-------------|-------------|-------------|
| H              | 5.82652700  | -1.48588400 | -0.69122400 |
| <b>IM3(SR)</b> |             |             |             |
| H              | -0.16490700 | -2.40322700 | 0.08321000  |
| C              | -1.39447800 | -0.26312400 | -0.60116900 |
| C              | -0.27238400 | 0.35946100  | 0.16178200  |
| C              | 0.95795200  | -0.21350100 | 0.33966400  |
| H              | -0.39410900 | 1.40612900  | 0.37719000  |
| O              | 1.33532500  | -1.41210200 | 0.16041500  |
| C              | -2.44231300 | 0.80519700  | -0.94662400 |
| C              | -2.80435200 | 1.73403900  | 0.03779300  |
| C              | -3.10568400 | 0.85302700  | -2.17629500 |
| C              | -3.78911500 | 2.68704900  | -0.20235100 |
| C              | -4.09285000 | 1.80582500  | -2.41454800 |
| H              | -2.84672900 | 0.13969300  | -2.94950000 |
| C              | -4.43868300 | 2.72892200  | -1.43225300 |
| H              | -4.04660400 | 3.39429400  | 0.58080500  |
| H              | -4.59154800 | 1.82311900  | -3.37860700 |
| H              | -2.33042700 | 1.70332400  | 1.01402900  |
| H              | -5.20796800 | 3.47177500  | -1.62144600 |
| Br             | -0.57380700 | -0.96034800 | -2.31740000 |
| C              | 5.88633000  | -2.03175700 | -2.69059300 |
| C              | 6.55198500  | -2.04201300 | -1.46866000 |
| C              | 5.84261200  | -1.71616700 | -0.31573800 |
| C              | 3.80849500  | -1.39804600 | -1.61019500 |
| C              | 4.52619400  | -1.71990600 | -2.75902900 |

|   |             |             |             |
|---|-------------|-------------|-------------|
| H | 6.42656500  | -2.28062200 | -3.59853100 |
| H | 7.60525800  | -2.30182400 | -1.41516100 |
| H | 2.73919100  | -1.20496400 | -1.64458600 |
| H | 4.01827500  | -1.74126100 | -3.71763700 |
| C | 4.49248200  | -1.38479900 | -0.39553700 |
| C | 3.93802800  | -1.04037100 | 0.97058200  |
| C | 5.18650500  | -1.06591800 | 1.93130300  |
| H | 3.15285800  | -1.72875100 | 1.27709200  |
| C | 6.33228900  | -1.70244400 | 1.10940000  |
| H | 4.95010100  | -1.65318400 | 2.81882000  |
| H | 7.25469400  | -1.12969700 | 1.25350400  |
| H | 6.53179700  | -2.72013600 | 1.46039400  |
| N | 3.33883500  | 0.31047300  | 0.95426300  |
| O | 5.54735300  | 0.20691400  | 2.44929700  |
| C | 4.12038500  | 1.42385900  | 1.07800600  |
| C | 5.54372700  | 1.23262600  | 1.48058800  |
| H | 6.16272700  | 0.97658700  | 0.60836700  |
| H | 5.93042000  | 2.14236300  | 1.94037000  |
| N | 3.43694600  | 2.51349600  | 0.89837600  |
| C | 2.08736900  | 0.72756300  | 0.66401900  |
| N | 2.17513000  | 2.06770000  | 0.62580900  |
| C | 1.16206500  | 3.03137400  | 0.28164000  |
| C | 0.82738500  | 3.19874600  | -1.06513900 |
| C | 0.53091600  | 3.71369600  | 1.32177800  |
| C | -0.19362200 | 4.10065800  | -1.35241900 |



|   |             |             |             |
|---|-------------|-------------|-------------|
| C | -0.48137600 | 4.60811100  | 0.97829600  |
| C | -0.85774400 | 4.80934800  | -0.34960700 |
| H | -0.49470100 | 4.23503600  | -2.38864500 |
| H | -0.99582900 | 5.14777700  | 1.76931000  |
| C | 1.45242400  | 2.36879700  | -2.15197000 |
| H | 2.49098600  | 2.10962900  | -1.92805700 |
| H | 0.88421500  | 1.43758000  | -2.27569600 |
| H | 1.43056500  | 2.90700400  | -3.10159300 |
| C | 0.89816900  | 3.43804500  | 2.75515700  |
| H | 0.68842500  | 2.39253900  | 3.00931300  |
| H | 1.96216800  | 3.61602800  | 2.93435900  |
| H | 0.32042500  | 4.07238400  | 3.42892300  |
| C | -1.97533400 | 5.75211700  | -0.70895000 |
| H | -2.41167300 | 6.20985100  | 0.18147800  |
| H | -1.61712300 | 6.55210700  | -1.36354700 |
| H | -2.76594200 | 5.21380700  | -1.24049300 |
| N | -1.16418400 | -2.58923200 | 0.22666400  |
| C | -1.50551000 | -3.81472400 | 0.69658800  |
| O | -0.74003700 | -4.73398900 | 0.89020900  |
| O | -2.84139300 | -3.89516900 | 0.93008200  |
| C | -3.28145700 | -5.17166500 | 1.37303300  |
| H | -3.09419900 | -5.92953400 | 0.60917600  |
| H | -2.76142300 | -5.45973500 | 2.28889400  |
| H | -4.35093900 | -5.06965900 | 1.55462700  |
| C | -4.36214700 | -0.09368200 | 3.40862700  |

|                |             |             |             |
|----------------|-------------|-------------|-------------|
| C              | -2.98749400 | -0.18533400 | 3.60721700  |
| C              | -2.15623000 | -0.65917100 | 2.58379400  |
| C              | -2.72747100 | -1.02801200 | 1.38313400  |
| C              | -4.11275600 | -0.96170800 | 1.20651300  |
| C              | -4.95185700 | -0.48682200 | 2.20290400  |
| H              | -4.99503400 | 0.28051400  | 4.20738600  |
| H              | -2.55945000 | 0.11018800  | 4.55930900  |
| H              | -1.08094300 | -0.73247200 | 2.71646200  |
| H              | -6.02470800 | -0.42373800 | 2.05419800  |
| C              | -2.09231900 | -1.50140700 | 0.08937700  |
| C              | -3.34942200 | -1.87724100 | -0.75491700 |
| O              | -3.37029900 | -2.40102300 | -1.84201800 |
| N              | -4.45513700 | -1.42539800 | -0.06114400 |
| C              | -5.79177100 | -1.47562500 | -0.59526500 |
| H              | -6.44209000 | -2.09047300 | 0.03566600  |
| H              | -6.20926000 | -0.46607700 | -0.67322900 |
| H              | -5.72218600 | -1.92068900 | -1.58841500 |
| <b>IM3(SS)</b> |             |             |             |
| H              | -0.17068600 | -1.84353800 | 0.88724500  |
| C              | 1.64574700  | -0.10223500 | 0.79565000  |
| C              | 0.41273600  | 0.63559900  | 0.39654100  |
| C              | -0.87377200 | 0.26750300  | 0.68227000  |
| H              | 0.56704700  | 1.51851700  | -0.19923900 |
| O              | -1.34759200 | -0.66820000 | 1.40491600  |
| C              | 2.91653300  | 0.72216100  | 0.54626800  |

|    |             |             |             |
|----|-------------|-------------|-------------|
| C  | 2.99361600  | 1.54495200  | -0.58728000 |
| C  | 4.05219700  | 0.61413600  | 1.35357200  |
| C  | 4.15533700  | 2.25128800  | -0.88514100 |
| C  | 5.21573800  | 1.31597300  | 1.05161400  |
| H  | 4.02276000  | -0.02082100 | 2.23082800  |
| C  | 5.27361300  | 2.14340400  | -0.06477300 |
| H  | 4.18061400  | 2.88260000  | -1.76873900 |
| H  | 6.08042100  | 1.21216300  | 1.69927400  |
| H  | 2.15767100  | 1.61414700  | -1.27589000 |
| H  | 6.18029300  | 2.69394000  | -0.29534600 |
| Br | 1.50730000  | -0.52604100 | 2.75960000  |
| C  | -6.65311200 | -1.38359500 | 2.49487800  |
| C  | -6.77687400 | -1.85849900 | 1.19145700  |
| C  | -5.70686500 | -1.70007500 | 0.31529800  |
| C  | -4.39674100 | -0.61785600 | 2.05296400  |
| C  | -5.47216700 | -0.77283200 | 2.92355700  |
| H  | -7.48085100 | -1.49539800 | 3.18823100  |
| H  | -7.69291100 | -2.34235700 | 0.86480800  |
| H  | -3.45221600 | -0.18372900 | 2.36887800  |
| H  | -5.38976100 | -0.42413400 | 3.94792300  |
| C  | -4.53946500 | -1.07699400 | 0.74768900  |
| C  | -3.52082000 | -1.00321000 | -0.36607800 |
| C  | -4.29851200 | -1.47132400 | -1.64878200 |
| H  | -2.65321200 | -1.64014000 | -0.17945500 |
| C  | -5.58211000 | -2.15195800 | -1.11824500 |

|   |             |             |             |
|---|-------------|-------------|-------------|
| H | -3.66980300 | -2.15855200 | -2.21585400 |
| H | -6.43597900 | -1.87477500 | -1.74478600 |
| H | -5.48029000 | -3.24105400 | -1.17102900 |
| N | -3.03776100 | 0.37554500  | -0.54520900 |
| O | -4.60006000 | -0.42510400 | -2.56728300 |
| C | -3.75174000 | 1.29404600  | -1.26119100 |
| C | -4.96967700 | 0.79890400  | -1.96746100 |
| H | -5.80717500 | 0.67844900  | -1.26545100 |
| H | -5.25632700 | 1.49263800  | -2.75812000 |
| N | -3.14593100 | 2.44408100  | -1.30821000 |
| C | -1.91974100 | 0.98669700  | -0.11326200 |
| N | -2.00753000 | 2.23856000  | -0.57678000 |
| C | -1.02389500 | 3.27468000  | -0.43370500 |
| C | -0.89411500 | 3.90909000  | 0.79916000  |
| C | -0.17224000 | 3.51129500  | -1.51822000 |
| C | 0.13844500  | 4.83813100  | 0.93039400  |
| C | 0.84080500  | 4.44636600  | -1.33478300 |
| C | 1.01558600  | 5.11037800  | -0.11709300 |
| H | 0.27112100  | 5.34166400  | 1.88435700  |
| H | 1.52927300  | 4.64346200  | -2.15360000 |
| C | -1.78052100 | 3.54518100  | 1.95937600  |
| H | -2.82753300 | 3.46058900  | 1.65512300  |
| H | -1.47080200 | 2.58090800  | 2.37985600  |
| H | -1.70808200 | 4.29586000  | 2.74800100  |
| C | -0.29436300 | 2.70203500  | -2.78190900 |

|   |             |             |             |
|---|-------------|-------------|-------------|
| H | -0.08301600 | 1.64263700  | -2.58060200 |
| H | -1.30113600 | 2.76857100  | -3.20295800 |
| H | 0.41930300  | 3.05252600  | -3.52963800 |
| C | 2.16750400  | 6.06393400  | 0.06092500  |
| H | 3.11067900  | 5.50930900  | 0.10235300  |
| H | 2.23203600  | 6.76628900  | -0.77442600 |
| H | 2.07257000  | 6.63626900  | 0.98571500  |
| N | 0.52741900  | -2.23976000 | 0.23906500  |
| C | -0.01671100 | -3.00936100 | -0.73625900 |
| O | -1.20110000 | -3.27593300 | -0.84599300 |
| O | 0.92801200  | -3.48612600 | -1.57847300 |
| C | 0.41694500  | -4.10442700 | -2.75239600 |
| H | -0.23419400 | -4.94079000 | -2.49290900 |
| H | -0.14579800 | -3.37968400 | -3.34650100 |
| H | 1.28739000  | -4.45322600 | -3.30684200 |
| C | 5.58149500  | -3.31948700 | 0.49088100  |
| C | 4.69713000  | -3.49908700 | 1.54993800  |
| C | 3.40630800  | -2.96002600 | 1.49795600  |
| C | 3.03144700  | -2.24539600 | 0.37656700  |
| C | 3.91805300  | -2.10602300 | -0.69503100 |
| C | 5.20339200  | -2.62062100 | -0.65988900 |
| H | 6.58172100  | -3.73696700 | 0.55079600  |
| H | 5.00941600  | -4.06167600 | 2.42316200  |
| H | 2.71146000  | -3.07765700 | 2.32147500  |
| H | 5.88852300  | -2.49283700 | -1.49126800 |

|   |            |             |             |
|---|------------|-------------|-------------|
| C | 1.75620800 | -1.50131800 | 0.04995900  |
| C | 1.99269500 | -1.12303700 | -1.45134100 |
| O | 1.19466200 | -0.60864300 | -2.20834800 |
| N | 3.29839700 | -1.41423000 | -1.74246100 |
| C | 3.93210400 | -1.05637500 | -2.98557500 |
| H | 4.75038300 | -0.35133700 | -2.80287000 |
| H | 4.32324800 | -1.94489100 | -3.49148800 |
| H | 3.17365000 | -0.58495500 | -3.61141200 |

**TS4(RR)**

|   |             |             |             |
|---|-------------|-------------|-------------|
| H | 0.96770000  | -0.95382500 | -2.21704300 |
| C | 1.23813100  | 0.15481000  | 0.13209600  |
| C | -0.11602300 | 0.39052000  | 0.18886000  |
| C | -1.19469200 | 0.02010400  | -0.67076600 |
| H | -0.38385200 | 1.16348400  | 0.89775700  |
| O | -1.27551300 | -0.68568300 | -1.66568100 |
| C | 2.01801000  | 0.93735400  | 1.14895500  |
| C | 1.74800700  | 0.69859700  | 2.50209100  |
| C | 2.97012100  | 1.89741500  | 0.79508800  |
| C | 2.42823700  | 1.40313700  | 3.49163700  |
| C | 3.64277800  | 2.59903800  | 1.79084500  |
| H | 3.13834500  | 2.09763900  | -0.25805600 |
| C | 3.37781400  | 2.35688500  | 3.13715000  |
| H | 2.21362300  | 1.20571200  | 4.53732200  |
| H | 4.37790900  | 3.34662900  | 1.50836100  |
| H | 1.00741900  | -0.05215100 | 2.76912900  |

|    |             |             |             |
|----|-------------|-------------|-------------|
| H  | 3.90983200  | 2.90852100  | 3.90605100  |
| Br | 1.68772700  | 1.48602000  | -2.35661400 |
| C  | -3.24942400 | -3.86071200 | 2.48973800  |
| C  | -4.52022900 | -3.34940000 | 2.23106300  |
| C  | -4.69013900 | -2.50329000 | 1.14314500  |
| C  | -2.33765400 | -2.70582700 | 0.56267700  |
| C  | -2.16998900 | -3.53984500 | 1.66772600  |
| H  | -3.10039000 | -4.51970900 | 3.33935700  |
| H  | -5.36176600 | -3.60719900 | 2.86722800  |
| H  | -1.48474400 | -2.48445000 | -0.06985800 |
| H  | -1.17885700 | -3.92485700 | 1.87620200  |
| C  | -3.60604300 | -2.18525000 | 0.31777000  |
| C  | -4.05236600 | -1.26004700 | -0.79325400 |
| C  | -5.59875700 | -1.40488800 | -0.76043300 |
| H  | -3.60928100 | -1.47837100 | -1.76505200 |
| C  | -5.95194500 | -1.82133300 | 0.68225600  |
| H  | -5.84943600 | -2.22428900 | -1.43728300 |
| H  | -6.16875500 | -0.95179600 | 1.31416300  |
| H  | -6.83440400 | -2.46477400 | 0.70898800  |
| N  | -3.72940300 | 0.16319100  | -0.50314700 |
| O  | -6.29003100 | -0.28361000 | -1.27274600 |
| C  | -4.64711400 | 1.16520800  | -0.35315500 |
| C  | -6.10986300 | 0.90311800  | -0.53919600 |
| H  | -6.61777100 | 0.87326200  | 0.43301300  |
| H  | -6.54454500 | 1.71573500  | -1.12363300 |

|   |             |             |             |
|---|-------------|-------------|-------------|
| N | -4.06791700 | 2.30593500  | -0.09475700 |
| C | -2.51727100 | 0.72166400  | -0.34241100 |
| N | -2.74188700 | 2.00890100  | -0.08757800 |
| C | -1.71417600 | 3.01071500  | 0.05914000  |
| C | -1.35594100 | 3.39647500  | 1.35370800  |
| C | -1.01572600 | 3.37913100  | -1.08941400 |
| C | -0.20842400 | 4.17117500  | 1.48170300  |
| C | 0.13400200  | 4.14547000  | -0.90227500 |
| C | 0.55605600  | 4.53281600  | 0.36770600  |
| H | 0.12197900  | 4.46315600  | 2.47523800  |
| H | 0.74099800  | 4.38388000  | -1.77025000 |
| C | -2.12758000 | 2.90541900  | 2.54982600  |
| H | -1.74548000 | 3.36215900  | 3.46382000  |
| H | -3.19250900 | 3.13850200  | 2.46312600  |
| H | -2.03485200 | 1.81731200  | 2.65665400  |
| C | -1.43960100 | 2.91046000  | -2.45494800 |
| H | -1.02878000 | 1.91603500  | -2.65942400 |
| H | -2.52937600 | 2.89499400  | -2.55346400 |
| H | -1.02921000 | 3.57243400  | -3.21877300 |
| C | 1.82431800  | 5.32791600  | 0.52828800  |
| H | 2.59530000  | 4.95235900  | -0.14990600 |
| H | 1.65522300  | 6.38345100  | 0.29149100  |
| H | 2.20439900  | 5.26228100  | 1.55009100  |
| N | 1.31607000  | -1.64194400 | -1.55397400 |
| C | 1.57794900  | -2.87809500 | -2.05974500 |



|   |            |             |             |
|---|------------|-------------|-------------|
| O | 1.21129200 | -3.28730000 | -3.13732200 |
| O | 2.29611600 | -3.62416100 | -1.18193300 |
| C | 2.58319200 | -4.94074000 | -1.63584400 |
| H | 3.17045100 | -5.40572000 | -0.84484300 |
| H | 1.65979600 | -5.49787700 | -1.80713300 |
| H | 3.15190300 | -4.90823100 | -2.56704600 |
| C | 6.18832200 | -1.14313800 | 0.04781000  |
| C | 5.69211600 | -0.50853500 | -1.08597200 |
| C | 4.31389600 | -0.43711900 | -1.32464200 |
| C | 3.45638000 | -1.01058900 | -0.40471800 |
| C | 3.97113700 | -1.67307900 | 0.71218600  |
| C | 5.32904200 | -1.74612200 | 0.97137500  |
| H | 7.25955000 | -1.18179200 | 0.21857600  |
| H | 6.37919900 | -0.05863200 | -1.79452400 |
| H | 3.90975700 | 0.07978100  | -2.18861800 |
| H | 5.71245800 | -2.25677600 | 1.84844100  |
| C | 1.93560200 | -1.10917200 | -0.37592700 |
| C | 1.72048400 | -2.07277500 | 0.85959700  |
| O | 0.65959400 | -2.51714600 | 1.24165100  |
| N | 2.93171300 | -2.24011700 | 1.46356300  |
| C | 3.11850400 | -3.02602700 | 2.65717100  |
| H | 3.75199500 | -3.89543200 | 2.45318300  |
| H | 3.58245100 | -2.41847000 | 3.44041600  |
| H | 2.13470400 | -3.36088200 | 2.98586100  |

**TS4(RS)**

|    |             |             |             |
|----|-------------|-------------|-------------|
| H  | 0.01263500  | -2.55984900 | -1.25902100 |
| C  | 1.55167200  | -0.38055700 | -0.60075200 |
| C  | 0.74210200  | 0.59654200  | 0.09611500  |
| C  | -0.47190600 | 0.37410300  | 0.72998400  |
| H  | 0.88927600  | 1.59856000  | -0.29357600 |
| O  | -0.91648500 | -0.56704400 | 1.42315000  |
| C  | 2.94345300  | 0.13441100  | -0.93285900 |
| C  | 3.63231400  | 0.79305000  | 0.09275900  |
| C  | 3.60506500  | -0.10429800 | -2.14234300 |
| C  | 4.95426500  | 1.19340100  | -0.08049100 |
| C  | 4.92482200  | 0.30092700  | -2.31297800 |
| H  | 3.07942100  | -0.60493800 | -2.94689600 |
| C  | 5.60620000  | 0.94750200  | -1.28413800 |
| H  | 5.47194800  | 1.69494200  | 0.73092400  |
| H  | 5.42004300  | 0.11216400  | -3.26021000 |
| H  | 3.12656600  | 0.96838200  | 1.03753200  |
| H  | 6.63600200  | 1.26162800  | -1.42324000 |
| Br | 0.47091200  | -0.47161500 | -2.53861700 |
| C  | -6.26603900 | -2.01682100 | 1.68948700  |
| C  | -6.21924600 | -2.14344300 | 0.30242600  |
| C  | -5.11840400 | -1.63606800 | -0.38059100 |
| C  | -4.11790000 | -0.89870700 | 1.70846800  |
| C  | -5.22388500 | -1.40331500 | 2.38846600  |
| H  | -7.12168700 | -2.40294800 | 2.23435200  |
| H  | -7.02936100 | -2.62820500 | -0.23421900 |

|   |             |             |             |
|---|-------------|-------------|-------------|
| H | -3.28163800 | -0.43773700 | 2.22735700  |
| H | -5.27659000 | -1.32315900 | 3.46943900  |
| C | -4.09063200 | -1.01758300 | 0.32473900  |
| C | -3.01366000 | -0.54522000 | -0.61872500 |
| C | -3.65311200 | -0.66188700 | -2.04117100 |
| H | -2.12193700 | -1.17051400 | -0.54570000 |
| C | -4.80128600 | -1.67699000 | -1.85633300 |
| H | -2.89856200 | -0.99842700 | -2.75383000 |
| H | -5.64237300 | -1.41868600 | -2.50563700 |
| H | -4.45460700 | -2.67833700 | -2.13440000 |
| N | -2.62738400 | 0.83947400  | -0.35290600 |
| O | -4.11851300 | 0.57520200  | -2.58087200 |
| C | -3.34808000 | 1.89687000  | -0.82783300 |
| C | -4.54331900 | 1.55478400  | -1.65573500 |
| H | -5.36248200 | 1.19547800  | -1.01769300 |
| H | -4.87639600 | 2.42490800  | -2.22128100 |
| N | -2.76013900 | 3.02825100  | -0.56865000 |
| C | -1.52908000 | 1.33194300  | 0.24009200  |
| N | -1.62411400 | 2.65453200  | 0.10629800  |
| C | -0.62377900 | 3.61458200  | 0.47192900  |
| C | -0.46287000 | 3.93656700  | 1.81770900  |
| C | 0.17537100  | 4.13482000  | -0.55278700 |
| C | 0.54410500  | 4.84773000  | 2.13621700  |
| C | 1.16470700  | 5.03936000  | -0.17972700 |
| C | 1.35951800  | 5.40819200  | 1.15440800  |

|   |             |             |             |
|---|-------------|-------------|-------------|
| H | 0.69472000  | 5.12111700  | 3.17724500  |
| H | 1.80914300  | 5.45808100  | -0.94864800 |
| C | -1.32918500 | 3.30587100  | 2.87607700  |
| H | -1.16804600 | 3.78959000  | 3.84061700  |
| H | -2.38935100 | 3.39076500  | 2.62006100  |
| H | -1.10074300 | 2.24024400  | 2.98926200  |
| C | -0.01240000 | 3.69914200  | -1.98335900 |
| H | 0.09127100  | 2.61148700  | -2.09490100 |
| H | -1.00695400 | 3.97149000  | -2.34727700 |
| H | 0.73329400  | 4.17277000  | -2.62346400 |
| C | 2.43484400  | 6.40044300  | 1.51374700  |
| H | 3.38706300  | 6.12854300  | 1.05063900  |
| H | 2.17184200  | 7.40186300  | 1.15946800  |
| H | 2.58208700  | 6.45321300  | 2.59415700  |
| N | 0.32712300  | -2.57147400 | -0.29600600 |
| C | -0.62283700 | -3.02616400 | 0.56716500  |
| O | -1.76080600 | -3.27457300 | 0.20847600  |
| O | -0.16814200 | -3.23476600 | 1.80659100  |
| C | -1.19614300 | -3.43083200 | 2.77059600  |
| H | -0.68633000 | -3.50486400 | 3.73083400  |
| H | -1.87934900 | -2.57808300 | 2.75878100  |
| H | -1.75472000 | -4.34448800 | 2.55876100  |
| C | 4.12353300  | -1.86695600 | 3.30837200  |
| C | 2.83934600  | -1.36270300 | 3.50212900  |
| C | 1.90856500  | -1.35875600 | 2.45948300  |

|   |            |             |             |
|---|------------|-------------|-------------|
| C | 2.27931100 | -1.88579000 | 1.23323300  |
| C | 3.57418500 | -2.38588900 | 1.05371400  |
| C | 4.51407200 | -2.38772000 | 2.07446100  |
| H | 4.83558700 | -1.85606900 | 4.12767300  |
| H | 2.55824600 | -0.96662300 | 4.47208800  |
| H | 0.90288800 | -0.97472700 | 2.59309700  |
| H | 5.51553500 | -2.77242900 | 1.91482400  |
| C | 1.58369600 | -1.88467600 | -0.11872200 |
| C | 2.61785400 | -2.64785000 | -1.00267000 |
| O | 2.44424000 | -3.01225600 | -2.14278900 |
| N | 3.75235100 | -2.83654100 | -0.25525900 |
| C | 4.97920400 | -3.36566800 | -0.79719000 |
| H | 5.76636600 | -2.60496000 | -0.76270300 |
| H | 5.30091900 | -4.25069400 | -0.24012600 |
| H | 4.78049900 | -3.63928800 | -1.83371300 |

**TS4(SR)**

|   |             |             |             |
|---|-------------|-------------|-------------|
| H | -1.65064200 | 1.49181900  | -0.13198500 |
| C | -1.28637700 | -0.88739600 | 0.72755900  |
| C | 0.06611100  | -0.68611500 | 0.68205800  |
| C | 0.83725000  | 0.00569500  | -0.30839000 |
| H | 0.59466700  | -0.91667400 | 1.60416000  |
| O | 0.67886000  | 0.10621900  | -1.51496000 |
| C | -1.79581100 | -1.85461300 | 1.74700200  |
| C | -1.43501600 | -3.19606100 | 1.57309400  |
| C | -2.64807900 | -1.49738300 | 2.79884700  |

|    |             |             |             |
|----|-------------|-------------|-------------|
| C  | -1.92755100 | -4.17567100 | 2.43096100  |
| C  | -3.12706900 | -2.48262900 | 3.65587300  |
| H  | -2.89575300 | -0.44967300 | 2.93762500  |
| C  | -2.77500700 | -3.81915900 | 3.47494300  |
| H  | -1.65094000 | -5.21407700 | 2.27866000  |
| H  | -3.77831700 | -2.19928700 | 4.47647600  |
| H  | -0.79384600 | -3.46650100 | 0.73826500  |
| H  | -3.15766700 | -4.57940200 | 4.14892500  |
| Br | -1.51042500 | 1.66850400  | 2.21561900  |
| C  | 5.81132100  | -2.46836900 | -2.86187000 |
| C  | 6.27106400  | -2.72991800 | -1.57368100 |
| C  | 5.48874500  | -2.34147900 | -0.48940500 |
| C  | 3.79890000  | -1.44020300 | -1.99086700 |
| C  | 4.58721400  | -1.82791800 | -3.07075800 |
| H  | 6.41367600  | -2.76137000 | -3.71551300 |
| H  | 7.22643500  | -3.22186000 | -1.41851600 |
| H  | 2.84664500  | -0.93676300 | -2.14758300 |
| H  | 4.24858900  | -1.62973500 | -4.08190700 |
| C  | 4.26840200  | -1.70961400 | -0.70846400 |
| C  | 3.59602700  | -1.36389300 | 0.60156000  |
| C  | 4.68531400  | -1.65844000 | 1.69924800  |
| H  | 2.68346300  | -1.94224700 | 0.77350200  |
| C  | 5.76206900  | -2.50903700 | 0.98401200  |
| H  | 4.23673400  | -2.19221000 | 2.53736900  |
| H  | 6.75842800  | -2.17110200 | 1.28518600  |

|   |             |             |             |
|---|-------------|-------------|-------------|
| H | 5.67563700  | -3.55932800 | 1.28127600  |
| N | 3.22880400  | 0.05217000  | 0.63024000  |
| O | 5.22033200  | -0.48456100 | 2.28716400  |
| C | 4.15522100  | 1.03122500  | 0.87048700  |
| C | 5.47994600  | 0.58083200  | 1.39410900  |
| H | 6.13814500  | 0.27426300  | 0.56847400  |
| H | 5.95880400  | 1.38139600  | 1.95744800  |
| N | 3.66115700  | 2.21171000  | 0.64305200  |
| C | 2.10944900  | 0.66673900  | 0.21964300  |
| N | 2.38643400  | 1.96570800  | 0.22258700  |
| C | 1.43821900  | 3.01524800  | -0.06558800 |
| C | 1.06330600  | 3.24367300  | -1.39312400 |
| C | 0.87125100  | 3.66922700  | 1.02994800  |
| C | 0.00149700  | 4.11869700  | -1.59531900 |
| C | -0.17820500 | 4.54338600  | 0.76332300  |
| C | -0.64929200 | 4.74689600  | -0.53234800 |
| H | -0.35611900 | 4.28264900  | -2.60830600 |
| H | -0.68317100 | 5.01594200  | 1.60033000  |
| C | 1.75381800  | 2.61728900  | -2.57735200 |
| H | 2.60893700  | 2.00148700  | -2.28949100 |
| H | 1.05855100  | 1.98212900  | -3.12909600 |
| H | 2.11404200  | 3.40378800  | -3.24630400 |
| C | 1.34703400  | 3.39947400  | 2.43077200  |
| H | 1.24006900  | 2.33662200  | 2.66619000  |
| H | 2.39006000  | 3.70559700  | 2.56040200  |

|   |             |             |             |
|---|-------------|-------------|-------------|
| H | 0.72152300  | 3.93537000  | 3.14493900  |
| C | -1.87523800 | 5.57605400  | -0.79413900 |
| H | -2.16869000 | 6.14710400  | 0.08868900  |
| H | -1.71585900 | 6.26996300  | -1.62429500 |
| H | -2.69423600 | 4.90483900  | -1.07027100 |
| N | -1.96938400 | 0.85038700  | -0.87204700 |
| C | -2.76625200 | 1.46038000  | -1.79950800 |
| O | -2.70842100 | 2.63172000  | -2.10854200 |
| O | -3.62796800 | 0.58662000  | -2.36905300 |
| C | -4.48349000 | 1.15987800  | -3.35030900 |
| H | -5.10553000 | 1.93930000  | -2.90587900 |
| H | -3.89735200 | 1.59617400  | -4.16164000 |
| H | -5.09898500 | 0.34102900  | -3.72012600 |
| C | -2.78644600 | -4.03268600 | -2.64743300 |
| C | -1.63312300 | -3.30102800 | -2.91166400 |
| C | -1.37999200 | -2.10107400 | -2.23534300 |
| C | -2.30659900 | -1.64724700 | -1.31641000 |
| C | -3.47335400 | -2.38484000 | -1.07121800 |
| C | -3.72992800 | -3.58369500 | -1.71945600 |
| H | -2.96375800 | -4.96633900 | -3.17199400 |
| H | -0.92219600 | -3.66242900 | -3.64702100 |
| H | -0.48625700 | -1.52042900 | -2.42773700 |
| H | -4.63296900 | -4.14907500 | -1.51569100 |
| C | -2.28465200 | -0.45731400 | -0.35489100 |
| C | -3.74460400 | -0.51061300 | 0.21416400  |



|   |             |             |             |
|---|-------------|-------------|-------------|
| O | -4.30819100 | 0.35076600  | 0.83712800  |
| N | -4.28038500 | -1.73054300 | -0.14658100 |
| C | -5.58515000 | -2.17177500 | 0.27747000  |
| H | -6.25445500 | -2.29659500 | -0.58032900 |
| H | -5.50797300 | -3.11996300 | 0.81887400  |
| H | -5.98361100 | -1.40333200 | 0.94036100  |

**TS4(SS)**

|    |             |             |             |
|----|-------------|-------------|-------------|
| H  | -0.86146900 | -1.38191600 | -1.88023000 |
| C  | -1.60568300 | 0.13171600  | 0.08961700  |
| C  | -0.31183600 | 0.58163700  | 0.31975500  |
| C  | 0.94573900  | 0.01291700  | -0.00173800 |
| H  | -0.26590100 | 1.58263700  | 0.73062900  |
| O  | 1.29396600  | -1.05237700 | -0.50638100 |
| C  | -2.65738600 | 0.93297000  | 0.81349500  |
| C  | -2.51871400 | 1.01495300  | 2.20631400  |
| C  | -3.76456200 | 1.53415700  | 0.20850600  |
| C  | -3.47148000 | 1.67280900  | 2.97931700  |
| C  | -4.70768800 | 2.19888100  | 0.98493100  |
| H  | -3.85904700 | 1.49058700  | -0.86951600 |
| C  | -4.57023600 | 2.26829600  | 2.36922400  |
| H  | -3.34967300 | 1.71987100  | 4.05703400  |
| H  | -5.55914800 | 2.66580800  | 0.49998100  |
| H  | -1.66321500 | 0.53889100  | 2.67920000  |
| H  | -5.31408100 | 2.78544000  | 2.96723300  |
| Br | -1.91972900 | 0.81912700  | -2.44358600 |

|   |            |             |             |
|---|------------|-------------|-------------|
| C | 6.36359600 | -2.38592500 | -2.09555900 |
| C | 6.72865600 | -2.40561500 | -0.75183600 |
| C | 5.83018200 | -1.92057800 | 0.19397400  |
| C | 4.21074900 | -1.41737300 | -1.54812800 |
| C | 5.11509100 | -1.89966900 | -2.49033700 |
| H | 7.05502400 | -2.75785000 | -2.84477000 |
| H | 7.69734800 | -2.79083900 | -0.44789100 |
| H | 3.22418500 | -1.06584800 | -1.83346600 |
| H | 4.84240400 | -1.90619800 | -3.54015200 |
| C | 4.59161100 | -1.42815400 | -0.20955900 |
| C | 3.79130900 | -0.94416400 | 0.98119300  |
| C | 4.81353700 | -0.97197500 | 2.17841900  |
| H | 2.91177000 | -1.56296400 | 1.16907600  |
| C | 5.97962000 | -1.86146600 | 1.69301700  |
| H | 4.33457200 | -1.37404900 | 3.07161000  |
| H | 6.93149200 | -1.43783400 | 2.02765300  |
| H | 5.89969900 | -2.86277500 | 2.12949300  |
| N | 3.31854900 | 0.43063000  | 0.77046000  |
| O | 5.25998200 | 0.31762200  | 2.57731300  |
| C | 4.15440000 | 1.50101900  | 0.91665600  |
| C | 5.49270600 | 1.22694000  | 1.51931700  |
| H | 6.18542700 | 0.82068000  | 0.76953100  |
| H | 5.91135500 | 2.13909300  | 1.94397500  |
| N | 3.55813300 | 2.61654300  | 0.60713300  |
| C | 2.13301800 | 0.90677600  | 0.35780400  |

|   |             |             |             |
|---|-------------|-------------|-------------|
| N | 2.30130700  | 2.22622300  | 0.25035600  |
| C | 1.30883000  | 3.15332800  | -0.22603500 |
| C | 0.85871300  | 3.01059500  | -1.53964100 |
| C | 0.73117300  | 4.02335200  | 0.70373100  |
| C | -0.25958900 | 3.75670600  | -1.90459500 |
| C | -0.37635800 | 4.75195300  | 0.28117600  |
| C | -0.90128600 | 4.60446800  | -1.00492500 |
| H | -0.67607000 | 3.61225200  | -2.89701300 |
| H | -0.86832500 | 5.41541100  | 0.98748000  |
| C | 1.46351500  | 2.03219600  | -2.50990300 |
| H | 2.50896500  | 1.80472600  | -2.28339700 |
| H | 0.87097100  | 1.10985200  | -2.50977800 |
| H | 1.41400800  | 2.43743100  | -3.52254200 |
| C | 1.23736800  | 4.10082400  | 2.11979100  |
| H | 1.20845000  | 3.11596800  | 2.60066000  |
| H | 2.27179700  | 4.45219900  | 2.15732800  |
| H | 0.61691600  | 4.77862500  | 2.70763500  |
| C | -2.17273000 | 5.29639800  | -1.41581000 |
| H | -2.93400200 | 4.54436700  | -1.64622000 |
| H | -2.55357600 | 5.94323600  | -0.62311100 |
| H | -2.02235800 | 5.90081900  | -2.31458100 |
| N | -1.20875800 | -1.97832900 | -1.13944600 |
| C | -1.00541600 | -3.30954100 | -1.27824000 |
| O | -0.35872000 | -3.83295800 | -2.15841800 |
| O | -1.63818100 | -4.00544200 | -0.29862300 |

|                |             |             |             |
|----------------|-------------|-------------|-------------|
| C              | -1.43750200 | -5.41070300 | -0.36238600 |
| H              | -1.80646700 | -5.80764800 | -1.31019100 |
| H              | -0.37655300 | -5.65214300 | -0.26977100 |
| H              | -1.99938600 | -5.82900200 | 0.47205900  |
| C              | -6.15426400 | -2.20960100 | 0.11220200  |
| C              | -5.69393400 | -1.72193000 | -1.10710900 |
| C              | -4.34111100 | -1.40906800 | -1.28621200 |
| C              | -3.47806900 | -1.59164000 | -0.22340000 |
| C              | -3.94665300 | -2.11007100 | 0.98498300  |
| C              | -5.28215700 | -2.41881700 | 1.18504000  |
| H              | -7.20749200 | -2.44170000 | 0.23513200  |
| H              | -6.38984600 | -1.57970400 | -1.92688700 |
| H              | -3.96423300 | -1.00546800 | -2.22049100 |
| H              | -5.63776300 | -2.81323700 | 2.13112100  |
| C              | -1.98204300 | -1.34960200 | -0.11007300 |
| C              | -1.67976300 | -1.94977900 | 1.32226200  |
| O              | -0.59835500 | -2.03484900 | 1.85777000  |
| N              | -2.88717600 | -2.26605900 | 1.88728900  |
| C              | -3.01646500 | -2.79799100 | 3.21973600  |
| H              | -3.66256400 | -2.15347900 | 3.82461300  |
| H              | -3.43837200 | -3.80819500 | 3.19524500  |
| H              | -2.01758600 | -2.83086700 | 3.65514200  |
| <b>IM4(RR)</b> |             |             |             |
| H              | 1.10473800  | -0.76794800 | -2.23139600 |
| C              | 1.22204500  | 0.10481800  | 0.24122600  |

|    |             |             |             |
|----|-------------|-------------|-------------|
| C  | -0.11451900 | 0.37396400  | 0.22870400  |
| C  | -1.19174100 | 0.00296300  | -0.65516500 |
| H  | -0.40310500 | 1.13980900  | 0.93814900  |
| O  | -1.26460100 | -0.71713800 | -1.63253600 |
| C  | 1.98231900  | 0.86432100  | 1.28503900  |
| C  | 1.78972600  | 0.52922200  | 2.62868400  |
| C  | 2.83279000  | 1.91942800  | 0.94307300  |
| C  | 2.45840400  | 1.23239400  | 3.62775600  |
| C  | 3.49507200  | 2.61600100  | 1.94916700  |
| H  | 2.93003700  | 2.18691800  | -0.10609000 |
| C  | 3.31420000  | 2.27595900  | 3.28855000  |
| H  | 2.30749600  | 0.96467200  | 4.66896000  |
| H  | 4.15532500  | 3.43551900  | 1.68128300  |
| H  | 1.11772700  | -0.28860400 | 2.88021800  |
| H  | 3.83774800  | 2.82376300  | 4.06601900  |
| Br | 1.70795900  | 1.62929300  | -2.38474000 |
| C  | -3.24854200 | -3.90115200 | 2.46620700  |
| C  | -4.51609200 | -3.37675800 | 2.21851000  |
| C  | -4.68570200 | -2.52364400 | 1.13619100  |
| C  | -2.33994600 | -2.74574300 | 0.53855800  |
| C  | -2.17215000 | -3.58665400 | 1.63789400  |
| H  | -3.10027200 | -4.56731500 | 3.31049000  |
| H  | -5.35629500 | -3.63153400 | 2.85772800  |
| H  | -1.48820500 | -2.53199400 | -0.09781000 |
| H  | -1.18322200 | -3.98395700 | 1.83430900  |

|   |             |             |             |
|---|-------------|-------------|-------------|
| C | -3.60439200 | -2.21096800 | 0.30508400  |
| C | -4.05167000 | -1.28161700 | -0.80246300 |
| C | -5.59802600 | -1.42569000 | -0.76363600 |
| H | -3.61243900 | -1.49720600 | -1.77679700 |
| C | -5.94459800 | -1.83141300 | 0.68364300  |
| H | -5.85096100 | -2.25064600 | -1.43315700 |
| H | -6.14543200 | -0.95584400 | 1.31273500  |
| H | -6.83389300 | -2.46481200 | 0.72088100  |
| N | -3.72873500 | 0.14231900  | -0.50906300 |
| O | -6.28999400 | -0.30772900 | -1.28091600 |
| C | -4.64969000 | 1.14062300  | -0.35489100 |
| C | -6.11185000 | 0.87977800  | -0.54849800 |
| H | -6.62466500 | 0.85210500  | 0.42139400  |
| H | -6.54223800 | 1.69259500  | -1.13622100 |
| N | -4.07429500 | 2.28067600  | -0.08363500 |
| C | -2.51933800 | 0.70469800  | -0.33762500 |
| N | -2.74856500 | 1.98785800  | -0.07204900 |
| C | -1.72640800 | 2.99425400  | 0.08501000  |
| C | -1.36390600 | 3.35997400  | 1.38495700  |
| C | -1.04357000 | 3.39265100  | -1.06187300 |
| C | -0.22468900 | 4.14420000  | 1.51863500  |
| C | 0.09431800  | 4.17585000  | -0.86946600 |
| C | 0.52262800  | 4.54134700  | 0.40418100  |
| H | 0.11400800  | 4.41717600  | 2.51490700  |
| H | 0.69067300  | 4.43852000  | -1.73777600 |

|   |             |             |             |
|---|-------------|-------------|-------------|
| C | -2.12353400 | 2.83981900  | 2.57640500  |
| H | -1.74097800 | 3.28412800  | 3.49637000  |
| H | -3.19134300 | 3.06416700  | 2.49987800  |
| H | -2.01983600 | 1.75084800  | 2.66525500  |
| C | -1.46246600 | 2.93697800  | -2.43286300 |
| H | -0.98413800 | 1.97945400  | -2.66764600 |
| H | -2.55022500 | 2.85338500  | -2.51843300 |
| H | -1.10681400 | 3.64396900  | -3.18384000 |
| C | 1.78279600  | 5.34784600  | 0.56882400  |
| H | 2.55406000  | 4.98784700  | -0.11800000 |
| H | 1.60225700  | 6.40402100  | 0.34369000  |
| H | 2.16679200  | 5.27602300  | 1.58884200  |
| N | 1.37092400  | -1.52326200 | -1.59905000 |
| C | 1.64913300  | -2.71634600 | -2.19423700 |
| O | 1.32393400  | -3.03207100 | -3.31524500 |
| O | 2.32738000  | -3.54048900 | -1.35441600 |
| C | 2.61175700  | -4.82201100 | -1.90076400 |
| H | 3.17273700  | -5.35413900 | -1.13309400 |
| H | 1.68676900  | -5.35265700 | -2.13678000 |
| H | 3.20415800  | -4.72599400 | -2.81271600 |
| C | 6.19689500  | -1.13144200 | 0.11993900  |
| C | 5.70796700  | -0.38245600 | -0.94530100 |
| C | 4.33249800  | -0.29454900 | -1.19239800 |
| C | 3.47046000  | -0.96742700 | -0.34673600 |
| C | 3.97662800  | -1.73713900 | 0.70218500  |

|   |            |             |             |
|---|------------|-------------|-------------|
| C | 5.33227600 | -1.83156700 | 0.96641300  |
| H | 7.26669300 | -1.18328700 | 0.29651300  |
| H | 6.39955600 | 0.14345500  | -1.59483700 |
| H | 3.93170000 | 0.30282100  | -2.00645200 |
| H | 5.70921500 | -2.43099600 | 1.78859900  |
| C | 1.95137900 | -1.09204500 | -0.35996100 |
| C | 1.72659900 | -2.16450900 | 0.78138600  |
| O | 0.66229800 | -2.64314900 | 1.10978800  |
| N | 2.93136600 | -2.38192900 | 1.38112800  |
| C | 3.11364400 | -3.30208800 | 2.47568500  |
| H | 3.72915200 | -4.15351000 | 2.16671200  |
| H | 3.59635700 | -2.79661800 | 3.31759600  |
| H | 2.12708700 | -3.65562300 | 2.77552400  |

**IM4(RS)**

|   |             |             |             |
|---|-------------|-------------|-------------|
| H | 0.29660900  | -1.09804600 | -1.17105800 |
| C | 1.98585600  | 0.26884500  | 0.07928400  |
| C | 0.90851100  | 0.98454600  | 0.44098700  |
| C | -0.38451600 | 0.47014100  | 0.91656400  |
| H | 0.94793900  | 2.06232400  | 0.29193400  |
| O | -0.57511400 | -0.39976900 | 1.74061200  |
| C | 3.16882200  | 1.01075900  | -0.43700300 |
| C | 4.39975600  | 0.97367000  | 0.22285800  |
| C | 3.03177800  | 1.70838100  | -1.64066800 |
| C | 5.48794700  | 1.65718700  | -0.31138000 |
| C | 4.12717000  | 2.38554200  | -2.16710700 |



|    |             |             |             |
|----|-------------|-------------|-------------|
| H  | 2.07486500  | 1.66326500  | -2.15845000 |
| C  | 5.35193300  | 2.36378100  | -1.50430300 |
| H  | 6.44168500  | 1.64080400  | 0.20686100  |
| H  | 4.02554900  | 2.91929700  | -3.10657900 |
| H  | 4.49651400  | 0.42288300  | 1.15535000  |
| H  | 6.20412000  | 2.89175400  | -1.92090400 |
| Br | -0.58031000 | 0.58286000  | -2.43957100 |
| C  | -5.55720400 | -3.32297100 | 1.98776200  |
| C  | -5.42848100 | -3.48823100 | 0.60891800  |
| C  | -4.49207700 | -2.72249000 | -0.07635400 |
| C  | -3.80989200 | -1.64876000 | 1.99606900  |
| C  | -4.75555600 | -2.41291800 | 2.67790600  |
| H  | -6.29187400 | -3.90818900 | 2.53189900  |
| H  | -6.05585300 | -4.19882500 | 0.07889700  |
| H  | -3.16691800 | -0.94563600 | 2.51885800  |
| H  | -4.86905100 | -2.30115800 | 3.75138300  |
| C  | -3.69968000 | -1.81303200 | 0.62209100  |
| C  | -2.75922400 | -1.11662100 | -0.33279100 |
| C  | -3.37005800 | -1.39009500 | -1.74124700 |
| H  | -1.75404900 | -1.54014100 | -0.29162500 |
| C  | -4.13337100 | -2.71257800 | -1.54366200 |
| H  | -2.57020300 | -1.44388200 | -2.47965600 |
| H  | -4.99351400 | -2.76396600 | -2.21575400 |
| H  | -3.46196900 | -3.54839800 | -1.77082400 |
| N  | -2.67387500 | 0.31616400  | -0.07795200 |

|   |             |             |             |
|---|-------------|-------------|-------------|
| O | -4.24181000 | -0.35584600 | -2.20260900 |
| C | -3.62929300 | 1.17128900  | -0.53698300 |
| C | -4.77723500 | 0.54529600  | -1.26005000 |
| H | -5.44890700 | 0.05309300  | -0.54264900 |
| H | -5.32994800 | 1.30724900  | -1.81012100 |
| N | -3.28710100 | 2.41550700  | -0.34666900 |
| C | -1.64618400 | 1.06657500  | 0.32504100  |
| N | -2.04756900 | 2.32829100  | 0.22009000  |
| C | -1.32468000 | 3.49071200  | 0.65416800  |
| C | -1.11676000 | 3.65958000  | 2.02602200  |
| C | -0.85301800 | 4.38364500  | -0.31599600 |
| C | -0.35977900 | 4.76095400  | 2.42457500  |
| C | -0.10470200 | 5.46518100  | 0.14219600  |
| C | 0.16186800  | 5.66300400  | 1.49883700  |
| H | -0.18087500 | 4.91808100  | 3.48509900  |
| H | 0.28530800  | 6.17187700  | -0.58600900 |
| C | -1.69587800 | 2.71137400  | 3.04708400  |
| H | -1.74418300 | 3.19897000  | 4.02222100  |
| H | -2.70825300 | 2.40045500  | 2.77237900  |
| H | -1.09024700 | 1.80639900  | 3.16105800  |
| C | -1.14727600 | 4.18414500  | -1.77640900 |
| H | -0.97380900 | 3.14547200  | -2.07948700 |
| H | -2.19577600 | 4.41609900  | -1.98689000 |
| H | -0.51948100 | 4.84085200  | -2.38085300 |
| C | 1.00966600  | 6.82549300  | 1.94459100  |

|   |             |             |             |
|---|-------------|-------------|-------------|
| H | 0.75766700  | 7.73189200  | 1.38867700  |
| H | 0.88001000  | 7.02717600  | 3.00985200  |
| H | 2.06947300  | 6.61568000  | 1.76886300  |
| N | 0.73473700  | -1.72148500 | -0.46997000 |
| C | 0.40656200  | -3.03241500 | -0.66360600 |
| O | -0.65854500 | -3.40193500 | -1.12137300 |
| O | 1.37806900  | -3.87135200 | -0.26149700 |
| C | 1.05601400  | -5.25464700 | -0.37870300 |
| H | 1.92455700  | -5.79107500 | 0.00022300  |
| H | 0.16959000  | -5.49147500 | 0.21294900  |
| H | 0.86637500  | -5.51351000 | -1.42202700 |
| C | 4.14798300  | -2.93802600 | 3.29158200  |
| C | 2.88267000  | -2.43501500 | 3.57181300  |
| C | 2.09893100  | -1.87289400 | 2.55593200  |
| C | 2.59880400  | -1.84557300 | 1.26901300  |
| C | 3.87308000  | -2.36354900 | 0.99733700  |
| C | 4.66788900  | -2.90827800 | 1.99346800  |
| H | 4.74732800  | -3.36304800 | 4.09063500  |
| H | 2.49966400  | -2.47310200 | 4.58583900  |
| H | 1.11381800  | -1.47074900 | 2.76091800  |
| H | 5.65412800  | -3.30310600 | 1.77291700  |
| C | 2.03430800  | -1.26410900 | -0.01971100 |
| C | 3.12787200  | -1.68049800 | -1.05687200 |
| O | 3.05789700  | -1.54501500 | -2.25269800 |
| N | 4.17092600  | -2.24702400 | -0.35983100 |

|   |            |             |             |
|---|------------|-------------|-------------|
| C | 5.38275400 | -2.70652000 | -0.99046200 |
| H | 6.24791900 | -2.15591000 | -0.60638000 |
| H | 5.52928300 | -3.77738600 | -0.81675800 |
| H | 5.27770500 | -2.52022700 | -2.05969200 |

**IM4(SR)**

|    |             |             |             |
|----|-------------|-------------|-------------|
| H  | 1.06684800  | 0.41686200  | -1.35910500 |
| C  | 1.05256800  | -1.53080700 | 0.29792300  |
| C  | -0.11125600 | -1.00652000 | 0.69830600  |
| C  | -0.42046700 | 0.42485000  | 0.90941600  |
| H  | -0.92366900 | -1.69834300 | 0.91096600  |
| O  | 0.19650800  | 1.15487800  | 1.64900900  |
| C  | 1.15019100  | -3.01245000 | 0.16014600  |
| C  | 1.82631700  | -3.79365600 | 1.09995300  |
| C  | 0.57437500  | -3.60250900 | -0.96930200 |
| C  | 1.91540800  | -5.17066200 | 0.91343300  |
| C  | 0.66877300  | -4.97968400 | -1.14462000 |
| H  | 0.08184300  | -2.95891000 | -1.69686800 |
| C  | 1.33711500  | -5.76329400 | -0.20670700 |
| H  | 2.43381400  | -5.78078700 | 1.64647900  |
| H  | 0.22572800  | -5.43957200 | -2.02214200 |
| H  | 2.27521600  | -3.32236600 | 1.97070700  |
| H  | 1.40968600  | -6.83709800 | -0.34907400 |
| Br | -0.91278100 | -0.36484100 | -2.42154800 |
| C  | -5.77983100 | -2.54634500 | 2.76370300  |
| C  | -6.06773900 | -2.65783900 | 1.40480200  |

|   |             |             |             |
|---|-------------|-------------|-------------|
| C | -5.19897100 | -2.08490600 | 0.48136600  |
| C | -3.76373600 | -1.30266000 | 2.27725600  |
| C | -4.63745500 | -1.87314900 | 3.19980000  |
| H | -6.45502400 | -2.98224200 | 3.49294900  |
| H | -6.96203800 | -3.17712200 | 1.07315300  |
| H | -2.87767400 | -0.76783100 | 2.61353700  |
| H | -4.43137000 | -1.79136100 | 4.26173100  |
| C | -4.05709000 | -1.41993400 | 0.92339600  |
| C | -3.26064900 | -0.90248800 | -0.24803500 |
| C | -4.21527000 | -1.05068700 | -1.48794100 |
| H | -2.35519200 | -1.46709800 | -0.48168300 |
| C | -5.28265400 | -2.07051400 | -1.02532300 |
| H | -3.61721700 | -1.39057900 | -2.33416300 |
| H | -6.26543000 | -1.77608600 | -1.40486700 |
| H | -5.05871000 | -3.06225100 | -1.43330300 |
| N | -2.84433700 | 0.48697000  | -0.05627700 |
| O | -4.80700800 | 0.15972300  | -1.93387600 |
| C | -3.67152000 | 1.50665400  | -0.41578200 |
| C | -5.01587000 | 1.14540200  | -0.94951300 |
| H | -5.67031500 | 0.79275700  | -0.13853700 |
| H | -5.46944100 | 2.01184500  | -1.43082900 |
| N | -3.07377400 | 2.66051700  | -0.32718600 |
| C | -1.65875500 | 1.03826700  | 0.26216900  |
| N | -1.82828500 | 2.35564100  | 0.12084300  |
| C | -0.86016800 | 3.41711800  | 0.29101600  |

|   |             |            |             |
|---|-------------|------------|-------------|
| C | -0.73376500 | 3.99229400 | 1.55991100  |
| C | -0.14317900 | 3.83340400 | -0.82740800 |
| C | 0.20998900  | 4.99907100 | 1.70581500  |
| C | 0.81318400  | 4.83224900 | -0.61452300 |
| C | 1.00752100  | 5.41416100 | 0.63253100  |
| H | 0.33666900  | 5.46528800 | 2.68012000  |
| H | 1.41997300  | 5.14498200 | -1.45948500 |
| C | -1.58623600 | 3.52815600 | 2.70881000  |
| H | -2.64605000 | 3.51426400 | 2.43535100  |
| H | -1.29887900 | 2.51654100 | 3.01222400  |
| H | -1.46528200 | 4.19017300 | 3.56790900  |
| C | -0.42432900 | 3.32001900 | -2.21186700 |
| H | 0.44654800  | 3.47688000 | -2.84738200 |
| H | -0.66703500 | 2.25451200 | -2.24388100 |
| H | -1.27833600 | 3.86511300 | -2.63058000 |
| C | 2.06284600  | 6.46965600 | 0.83941400  |
| H | 2.43299200  | 6.85119000 | -0.11416800 |
| H | 1.67196500  | 7.31096300 | 1.41843200  |
| H | 2.91530400  | 6.05968700 | 1.39067800  |
| N | 1.86683000  | 0.53040400 | -0.71908300 |
| C | 2.77129800  | 1.45354600 | -1.18265700 |
| O | 2.48644700  | 2.42463000 | -1.84730500 |
| O | 4.02959600  | 1.16655400 | -0.78895100 |
| C | 5.00457700  | 2.12528300 | -1.18343600 |
| H | 5.05136000  | 2.19727000 | -2.27180300 |

|   |            |             |             |
|---|------------|-------------|-------------|
| H | 4.76039500 | 3.10805500  | -0.77416500 |
| H | 5.95012900 | 1.76621600  | -0.77964800 |
| C | 5.15768400 | -1.10393000 | 3.00998300  |
| C | 4.07855200 | -0.26768000 | 3.27547600  |
| C | 3.08522500 | -0.05914400 | 2.30948900  |
| C | 3.21366500 | -0.68035600 | 1.08359100  |
| C | 4.30745300 | -1.51690000 | 0.82475200  |
| C | 5.28930500 | -1.74791400 | 1.77521700  |
| H | 5.91394100 | -1.26373600 | 3.77210100  |
| H | 3.99974500 | 0.22134100  | 4.24049600  |
| H | 2.22860600 | 0.57608000  | 2.50614700  |
| H | 6.13033900 | -2.40082600 | 1.56674800  |
| C | 2.28452900 | -0.72241100 | -0.12170600 |
| C | 3.12917000 | -1.55575100 | -1.13823900 |
| O | 2.86488200 | -1.73756300 | -2.30062500 |
| N | 4.23576700 | -2.02970700 | -0.46966600 |
| C | 5.21707000 | -2.89303200 | -1.07700800 |
| H | 6.20303300 | -2.41678300 | -1.08442600 |
| H | 5.27821900 | -3.84291400 | -0.53583500 |
| H | 4.89259600 | -3.07670700 | -2.10166600 |

**IM4(SS)**

|   |             |             |             |
|---|-------------|-------------|-------------|
| H | 0.18128900  | -1.55803700 | 0.17090600  |
| C | -1.72959100 | -0.16704000 | -1.15810500 |
| C | -0.64829200 | 0.36033900  | -1.76109900 |
| C | 0.81235300  | 0.42315200  | -1.50325100 |

|    |             |             |             |
|----|-------------|-------------|-------------|
| H  | -0.83367100 | 0.79130200  | -2.74362700 |
| O  | 1.60416100  | 0.40511100  | -2.42071900 |
| C  | -3.05003100 | 0.09883000  | -1.81252800 |
| C  | -3.78655500 | -0.89940300 | -2.45605900 |
| C  | -3.55779300 | 1.40194000  | -1.75072700 |
| C  | -5.01584100 | -0.59268500 | -3.03226300 |
| C  | -4.79103800 | 1.69945700  | -2.32194400 |
| H  | -2.98302900 | 2.16518300  | -1.23028100 |
| C  | -5.52200300 | 0.70255400  | -2.96317200 |
| H  | -5.57731800 | -1.37122000 | -3.53842000 |
| H  | -5.18098300 | 2.71102600  | -2.26544800 |
| H  | -3.39363200 | -1.90911800 | -2.51206400 |
| H  | -6.48286900 | 0.93473700  | -3.41167400 |
| Br | 1.16923600  | -2.86773800 | -1.19281700 |
| C  | 7.29066700  | 0.55118500  | -1.64674400 |
| C  | 7.13602400  | -0.55330500 | -0.80899300 |
| C  | 5.85828800  | -0.90733000 | -0.39198200 |
| C  | 4.89882700  | 0.92639600  | -1.66777100 |
| C  | 6.18323200  | 1.28339800  | -2.07607400 |
| H  | 8.28407400  | 0.84267700  | -1.97261500 |
| H  | 8.00167500  | -1.12380200 | -0.48528300 |
| H  | 4.02310000  | 1.46607800  | -2.01854200 |
| H  | 6.32294800  | 2.13160200  | -2.73837400 |
| C  | 4.75832500  | -0.16111100 | -0.81659300 |
| C  | 3.49342900  | -0.76020800 | -0.25112800 |



|   |             |             |             |
|---|-------------|-------------|-------------|
| C | 3.98303600  | -1.66566800 | 0.91103800  |
| H | 2.94646400  | -1.36828300 | -0.98119000 |
| C | 5.40796700  | -2.05960200 | 0.47822900  |
| H | 3.29666200  | -2.50797200 | 1.01997900  |
| H | 6.03854400  | -2.23344800 | 1.35376100  |
| H | 5.37561900  | -2.98576600 | -0.10725300 |
| N | 2.58484200  | 0.25519900  | 0.27597500  |
| O | 4.00334000  | -1.01324900 | 2.18085900  |
| C | 2.91609300  | 0.92377000  | 1.41734800  |
| C | 4.07712400  | 0.39284200  | 2.19647400  |
| H | 5.01864100  | 0.77088900  | 1.77317200  |
| H | 3.99470600  | 0.71496000  | 3.23517200  |
| N | 2.08152000  | 1.89106000  | 1.65936500  |
| C | 1.43918400  | 0.78120200  | -0.16986100 |
| N | 1.16525200  | 1.79972900  | 0.64997100  |
| C | 0.14891400  | 2.80747600  | 0.51701800  |
| C | 0.09517800  | 3.56767500  | -0.66011300 |
| C | -0.69477800 | 3.04099100  | 1.60781200  |
| C | -0.92140600 | 4.51600500  | -0.76154800 |
| C | -1.67710000 | 4.01555000  | 1.45507600  |
| C | -1.82540000 | 4.74089600  | 0.27525400  |
| H | -0.98565400 | 5.11305500  | -1.66812800 |
| H | -2.36224000 | 4.19164100  | 2.28037100  |
| C | 1.10886100  | 3.46714900  | -1.77424300 |
| H | 1.29773200  | 4.46490800  | -2.17592300 |

|   |             |             |             |
|---|-------------|-------------|-------------|
| H | 2.06381300  | 3.06014200  | -1.43260500 |
| H | 0.75847900  | 2.84346900  | -2.60163100 |
| C | -0.56338400 | 2.30378100  | 2.91224900  |
| H | -0.12452000 | 1.31488200  | 2.77988300  |
| H | 0.08947800  | 2.85944000  | 3.59286300  |
| H | -1.54871100 | 2.18825500  | 3.36530400  |
| C | -2.94246800 | 5.73982500  | 0.12282600  |
| H | -3.15187000 | 6.24609500  | 1.06805500  |
| H | -2.70200600 | 6.49582100  | -0.62801700 |
| H | -3.86331000 | 5.23775900  | -0.19267600 |
| N | -0.48400200 | -0.98721900 | 0.74735400  |
| C | -0.21144300 | -1.09198500 | 2.08324300  |
| O | 0.91736400  | -1.09453300 | 2.53350100  |
| O | -1.31828200 | -1.15059300 | 2.84886300  |
| C | -1.07234300 | -1.16308100 | 4.25252000  |
| H | -2.05324100 | -1.21529000 | 4.72260100  |
| H | -0.46688700 | -2.02965000 | 4.52290000  |
| H | -0.54842700 | -0.25447700 | 4.55901500  |
| C | -4.44944900 | -4.27037800 | 0.06709400  |
| C | -3.19919500 | -4.46082100 | -0.51269000 |
| C | -2.24709800 | -3.43362200 | -0.52266900 |
| C | -2.57920700 | -2.22487300 | 0.06260800  |
| C | -3.83369900 | -2.05362400 | 0.65515800  |
| C | -4.78970400 | -3.05503400 | 0.66814400  |
| H | -5.17515600 | -5.07767600 | 0.05889200  |

|   |             |             |             |
|---|-------------|-------------|-------------|
| H | -2.95500000 | -5.41547600 | -0.96582600 |
| H | -1.26808900 | -3.57370200 | -0.97240100 |
| H | -5.76206600 | -2.90275600 | 1.12469800  |
| C | -1.80588900 | -0.91371400 | 0.17420200  |
| C | -2.79880200 | -0.04285800 | 1.01638800  |
| O | -2.62178400 | 1.10238900  | 1.36766400  |
| N | -3.94625300 | -0.76334400 | 1.18390700  |
| C | -5.13024400 | -0.22769100 | 1.80864000  |
| H | -5.97278000 | -0.26177700 | 1.11078700  |
| H | -5.38475000 | -0.79533700 | 2.70924400  |
| H | -4.91667500 | 0.80743000  | 2.07503600  |

**TS5(RR)**

|   |             |             |             |
|---|-------------|-------------|-------------|
| H | 2.75849600  | 1.72394600  | -1.73957800 |
| C | 0.70735500  | -0.75309000 | 0.92778000  |
| C | -0.54729400 | -0.28743800 | 0.73437900  |
| C | -1.28250300 | -0.05272900 | -0.50560600 |
| H | -1.13131000 | -0.04723800 | 1.62232600  |
| O | -1.20025900 | -0.49532400 | -1.62655100 |
| C | 1.16048300  | -0.92227300 | 2.32892800  |
| C | 1.77087600  | -2.11072400 | 2.74983100  |
| C | 0.96432300  | 0.10788600  | 3.25546400  |
| C | 2.15302300  | -2.26905000 | 4.07568900  |
| C | 1.36461400  | -0.04878300 | 4.57876900  |
| H | 0.53135000  | 1.04635100  | 2.91773200  |
| C | 1.95483100  | -1.23861600 | 4.99308300  |

|    |             |             |             |
|----|-------------|-------------|-------------|
| H  | 2.61407400  | -3.19860600 | 4.39353400  |
| H  | 1.22219900  | 0.76338400  | 5.28488000  |
| H  | 1.92671800  | -2.91690400 | 2.03921300  |
| H  | 2.26755500  | -1.36181800 | 6.02503700  |
| Br | 3.88068200  | 2.57754000  | -1.43591200 |
| C  | -4.16177800 | -3.91080000 | 1.35687800  |
| C  | -5.26706100 | -3.06631400 | 1.24886500  |
| C  | -5.21447700 | -2.01047200 | 0.34846100  |
| C  | -2.97479200 | -2.66421400 | -0.35202500 |
| C  | -3.03173200 | -3.71326400 | 0.56458700  |
| H  | -4.18857500 | -4.73883600 | 2.05824600  |
| H  | -6.15369600 | -3.23682800 | 1.85230000  |
| H  | -2.08712600 | -2.53981900 | -0.96513800 |
| H  | -2.17916700 | -4.37927500 | 0.64519100  |
| C  | -4.07127000 | -1.81001800 | -0.43376100 |
| C  | -4.27287000 | -0.61134100 | -1.33042800 |
| C  | -5.81340600 | -0.45921700 | -1.34069900 |
| H  | -3.82646700 | -0.70053700 | -2.32193700 |
| C  | -6.27027800 | -0.97682700 | 0.04002800  |
| H  | -6.19308500 | -1.13144200 | -2.11338700 |
| H  | -6.25712600 | -0.17803500 | 0.79266900  |
| H  | -7.28589600 | -1.37751700 | 0.00862500  |
| N  | -3.72979600 | 0.63741500  | -0.72988400 |
| O  | -6.25437400 | 0.82721800  | -1.72238100 |
| C  | -4.43713500 | 1.78958000  | -0.51445300 |

|   |             |            |             |
|---|-------------|------------|-------------|
| C | -5.89626200 | 1.86830600 | -0.84596900 |
| H | -6.48637400 | 1.84944700 | 0.07977900  |
| H | -6.10030100 | 2.80964200 | -1.35939400 |
| N | -3.68110200 | 2.72233900 | -0.00215800 |
| C | -2.47631800 | 0.88108400 | -0.32071900 |
| N | -2.46083600 | 2.13094200 | 0.11387900  |
| C | -1.26989800 | 2.83989300 | 0.50884600  |
| C | -1.10376900 | 3.13556400 | 1.86651200  |
| C | -0.31575100 | 3.11334500 | -0.47326500 |
| C | 0.09933500  | 3.72110600 | 2.24303800  |
| C | 0.86298400  | 3.71934600 | -0.03733800 |
| C | 1.09880700  | 4.00196500 | 1.30394500  |
| H | 0.27182200  | 3.94247900 | 3.29383500  |
| H | 1.63717800  | 3.92689200 | -0.76874700 |
| C | -2.16957900 | 2.78876000 | 2.87212300  |
| H | -1.84339000 | 3.05165600 | 3.87968900  |
| H | -3.10327000 | 3.31831100 | 2.66163500  |
| H | -2.39188900 | 1.71489800 | 2.86151000  |
| C | -0.47480200 | 2.76462100 | -1.92824000 |
| H | 0.13733600  | 1.88585800 | -2.17611800 |
| H | -1.51392400 | 2.56842200 | -2.20689900 |
| H | -0.11336300 | 3.59194100 | -2.54322000 |
| C | 2.41846000  | 4.59844300 | 1.71454200  |
| H | 2.63438500  | 4.40364500 | 2.76746200  |
| H | 3.21880000  | 4.17427600 | 1.10198900  |

|   |            |             |             |
|---|------------|-------------|-------------|
| H | 2.41954800 | 5.68280900  | 1.56417500  |
| N | 1.49250700 | 0.00144200  | -1.18709300 |
| C | 1.80215200 | -0.20029400 | -2.45609300 |
| O | 1.84116500 | 0.69997800  | -3.30979300 |
| O | 2.12774000 | -1.49163500 | -2.82238000 |
| C | 2.45598300 | -1.65188400 | -4.19027700 |
| H | 2.68677600 | -2.71043200 | -4.32575500 |
| H | 1.61821300 | -1.36414400 | -4.83028500 |
| H | 3.31913200 | -1.03803500 | -4.45873200 |
| C | 5.70653900 | -2.13940400 | 0.44385900  |
| C | 5.35577700 | -0.81982000 | 0.71476600  |
| C | 4.03577200 | -0.38794100 | 0.54754300  |
| C | 3.08904400 | -1.29843300 | 0.12284600  |
| C | 3.45524900 | -2.61539800 | -0.15698200 |
| C | 4.75759000 | -3.06437200 | -0.00407300 |
| H | 6.73612700 | -2.45907500 | 0.57127600  |
| H | 6.11315900 | -0.11870000 | 1.04901500  |
| H | 3.75766200 | 0.64805600  | 0.71398000  |
| H | 5.03327300 | -4.08982900 | -0.22893300 |
| C | 1.63128200 | -1.07764900 | -0.24108500 |
| C | 1.21597800 | -2.54375300 | -0.67811900 |
| O | 0.11136700 | -2.94625400 | -0.97402000 |
| N | 2.33148600 | -3.34613400 | -0.56254400 |
| C | 2.37711400 | -4.69277600 | -1.07379400 |
| H | 3.02979600 | -4.74741700 | -1.95225000 |

|                |             |             |             |
|----------------|-------------|-------------|-------------|
| H              | 2.74641800  | -5.38632800 | -0.31170300 |
| H              | 1.36057000  | -4.96699000 | -1.35651700 |
| <b>TS5(RS)</b> |             |             |             |
| H              | -0.21329200 | -0.98294700 | -1.58635600 |
| C              | 2.02636100  | 0.25071500  | 0.63606000  |
| C              | 0.95227500  | 0.81968500  | 1.17527700  |
| C              | -0.39293200 | 0.13742200  | 1.09388400  |
| H              | 1.00800400  | 1.77532300  | 1.68734100  |
| O              | -0.99609000 | -0.26820900 | 2.10078200  |
| C              | 3.37809900  | 0.85612600  | 0.66468700  |
| C              | 3.92617200  | 1.27999200  | 1.87896900  |
| C              | 4.09338500  | 1.07188300  | -0.51991300 |
| C              | 5.16410500  | 1.91394100  | 1.91205200  |
| C              | 5.32991800  | 1.70921300  | -0.48324500 |
| H              | 3.66930800  | 0.75981700  | -1.47072800 |
| C              | 5.86860100  | 2.13082900  | 0.73037700  |
| H              | 5.58157700  | 2.23291800  | 2.86186500  |
| H              | 5.87265800  | 1.87969200  | -1.40788300 |
| H              | 3.37640500  | 1.09264400  | 2.79679700  |
| H              | 6.83557900  | 2.62355400  | 0.75566900  |
| Br             | -1.12335000 | -0.96361900 | -2.78513500 |
| C              | -6.62151800 | 0.54057100  | 2.82322100  |
| C              | -6.79141000 | -0.35868900 | 1.77113400  |
| C              | -5.68772500 | -0.70313800 | 0.99721900  |
| C              | -4.25561400 | 0.72782400  | 2.34482900  |

|   |             |             |             |
|---|-------------|-------------|-------------|
| C | -5.36520300 | 1.07649000  | 3.11255500  |
| H | -7.47670600 | 0.82382700  | 3.42878200  |
| H | -7.77051400 | -0.77852400 | 1.55920300  |
| H | -3.26037900 | 1.10273300  | 2.56935100  |
| H | -5.25279700 | 1.76392500  | 3.94468100  |
| C | -4.44236100 | -0.14857000 | 1.28435900  |
| C | -3.40133800 | -0.67306300 | 0.32655800  |
| C | -4.22669400 | -1.32884300 | -0.82438400 |
| H | -2.73451800 | -1.39940900 | 0.78800900  |
| C | -5.58210700 | -1.66459200 | -0.16495400 |
| H | -3.69134600 | -2.19935900 | -1.20681000 |
| H | -6.38921500 | -1.57168200 | -0.89678900 |
| H | -5.57907600 | -2.69877700 | 0.19800900  |
| N | -2.57556300 | 0.40623100  | -0.20746900 |
| O | -4.41061400 | -0.48843500 | -1.96082500 |
| C | -3.08222100 | 1.25362300  | -1.14928000 |
| C | -4.41340700 | 0.90286600  | -1.72854400 |
| H | -5.22280800 | 1.21180200  | -1.05189200 |
| H | -4.53757200 | 1.39855200  | -2.69174500 |
| N | -2.23177000 | 2.18841200  | -1.45548900 |
| C | -1.32162200 | 0.79298200  | 0.04832100  |
| N | -1.13812700 | 1.89105300  | -0.69377100 |
| C | -0.08216300 | 2.86380700  | -0.56822700 |
| C | -0.16400200 | 3.74074100  | 0.51498000  |
| C | 0.96957500  | 2.86425300  | -1.48324800 |



|   |             |             |             |
|---|-------------|-------------|-------------|
| C | 0.89656500  | 4.62360700  | 0.70559300  |
| C | 2.00539400  | 3.76590500  | -1.24622200 |
| C | 1.99677300  | 4.63297100  | -0.15283800 |
| H | 0.87001300  | 5.30494200  | 1.55219500  |
| H | 2.85805500  | 3.76881900  | -1.92141100 |
| C | -1.31202700 | 3.66334000  | 1.48782600  |
| H | -1.31813400 | 4.53440400  | 2.14496500  |
| H | -2.27492100 | 3.61486500  | 0.96968200  |
| H | -1.23198200 | 2.76769700  | 2.11871500  |
| C | 1.01354600  | 1.88577900  | -2.61911100 |
| H | 1.32263100  | 0.89238500  | -2.27014000 |
| H | 0.03504700  | 1.76067200  | -3.08796400 |
| H | 1.73233600  | 2.21208500  | -3.37375200 |
| C | 3.17598000  | 5.53467900  | 0.10114100  |
| H | 3.44676100  | 6.09231800  | -0.79955300 |
| H | 2.96780200  | 6.25091900  | 0.89855000  |
| H | 4.04653200  | 4.93928800  | 0.39524600  |
| N | 0.33591400  | -1.25037900 | -0.01660600 |
| C | -0.22925700 | -2.50239400 | -0.00296200 |
| O | -1.40783000 | -2.73958500 | 0.17614300  |
| O | 0.65086600  | -3.47485900 | -0.32865100 |
| C | 0.09542600  | -4.78377500 | -0.40631600 |
| H | 0.92942100  | -5.44353800 | -0.64175000 |
| H | -0.35845600 | -5.06334600 | 0.54650400  |
| H | -0.66336000 | -4.82621400 | -1.19064600 |

|   |            |             |             |
|---|------------|-------------|-------------|
| C | 3.98955500 | -3.79095700 | 2.66034900  |
| C | 2.91050100 | -3.14345900 | 3.25558400  |
| C | 2.11441400 | -2.26123900 | 2.51319300  |
| C | 2.42205000 | -2.07359600 | 1.18284800  |
| C | 3.50137200 | -2.72942300 | 0.59053600  |
| C | 4.30677700 | -3.59556300 | 1.31063900  |
| H | 4.60129200 | -4.46433600 | 3.25230400  |
| H | 2.68755600 | -3.32163200 | 4.30202100  |
| H | 1.26310600 | -1.74156800 | 2.95014800  |
| H | 5.14678700 | -4.10518500 | 0.85026800  |
| C | 1.77550200 | -1.16762300 | 0.14932900  |
| C | 2.55985800 | -1.54027400 | -1.13027200 |
| O | 2.33474500 | -1.14122900 | -2.25481000 |
| N | 3.57807900 | -2.38534400 | -0.76650300 |
| C | 4.51093200 | -2.95133300 | -1.70975400 |
| H | 5.53844100 | -2.69356800 | -1.43575400 |
| H | 4.40985900 | -4.04093200 | -1.74434300 |
| H | 4.27559500 | -2.53304800 | -2.68880400 |

**TS5(SS)**

|   |             |             |             |
|---|-------------|-------------|-------------|
| H | 0.62375600  | -2.19516300 | -0.11291500 |
| C | -1.94138200 | 0.07399200  | -1.04073200 |
| C | -0.86934900 | 0.74639300  | -1.44077700 |
| C | 0.49741600  | 0.27925900  | -0.99975500 |
| H | -0.92221500 | 1.49805500  | -2.22234900 |
| O | 1.20151800  | -0.35002000 | -1.80837400 |

|    |             |             |             |
|----|-------------|-------------|-------------|
| C  | -3.33763300 | 0.32146400  | -1.48256700 |
| C  | -4.01508400 | -0.57659500 | -2.31385000 |
| C  | -4.00483600 | 1.45591200  | -1.00838500 |
| C  | -5.33640300 | -0.33137400 | -2.67643100 |
| C  | -5.32760400 | 1.69325900  | -1.36995500 |
| H  | -3.47787700 | 2.12686000  | -0.33603500 |
| C  | -5.99484000 | 0.80185200  | -2.20604800 |
| H  | -5.85267700 | -1.03031000 | -3.32682100 |
| H  | -5.84205400 | 2.57051700  | -0.98881300 |
| H  | -3.50473100 | -1.46501600 | -2.67330000 |
| H  | -7.02696700 | 0.98745500  | -2.48675600 |
| Br | 1.54952700  | -3.37834500 | -0.11075900 |
| C  | 6.69318200  | 0.32163600  | -2.68282700 |
| C  | 6.84418600  | -0.29855900 | -1.44349100 |
| C  | 5.72754100  | -0.44955000 | -0.62815400 |
| C  | 4.32023200  | 0.61623900  | -2.29918800 |
| C  | 5.44203600  | 0.77137400  | -3.11016300 |
| H  | 7.55737800  | 0.45120800  | -3.32688600 |
| H  | 7.81794000  | -0.65483500 | -1.12024200 |
| H  | 3.33105000  | 0.92879600  | -2.62132600 |
| H  | 5.34293600  | 1.23804600  | -4.08491100 |
| C  | 4.48698200  | 0.01554100  | -1.05779500 |
| C  | 3.43020200  | -0.26660300 | -0.01778800 |
| C  | 4.23215200  | -0.66353400 | 1.26386000  |
| H  | 2.77898300  | -1.08215400 | -0.32870600 |

|   |             |             |             |
|---|-------------|-------------|-------------|
| C | 5.60753500  | -1.11325300 | 0.72278400  |
| H | 3.69625000  | -1.45380200 | 1.79000300  |
| H | 6.39782300  | -0.84006100 | 1.42769800  |
| H | 5.62354200  | -2.20331200 | 0.60978600  |
| N | 2.59686400  | 0.90554100  | 0.24060200  |
| O | 4.37038500  | 0.38536200  | 2.21890800  |
| C | 3.03220000  | 1.89890000  | 1.06310800  |
| C | 4.36376400  | 1.70139900  | 1.70853000  |
| H | 5.17471500  | 1.87308800  | 0.98681600  |
| H | 4.47570500  | 2.38633300  | 2.54936600  |
| N | 2.11276400  | 2.80256700  | 1.24922100  |
| C | 1.32474500  | 1.17497700  | -0.07407900 |
| N | 1.05524700  | 2.33619100  | 0.51952700  |
| C | -0.16441700 | 3.09022400  | 0.45311100  |
| C | -0.40646600 | 3.84724400  | -0.69837800 |
| C | -1.02243000 | 3.04994600  | 1.54860500  |
| C | -1.60898800 | 4.54000300  | -0.76023200 |
| C | -2.21809300 | 3.76412900  | 1.43491900  |
| C | -2.53005200 | 4.49651000  | 0.29239900  |
| H | -1.83729500 | 5.12721800  | -1.64650200 |
| H | -2.92381400 | 3.72872400  | 2.26053900  |
| C | 0.61357300  | 3.91927900  | -1.80521500 |
| H | 0.27906300  | 4.59945700  | -2.59002200 |
| H | 1.57258600  | 4.28124100  | -1.42108000 |
| H | 0.79867600  | 2.94153400  | -2.26374800 |

|   |             |             |             |
|---|-------------|-------------|-------------|
| C | -0.64992800 | 2.33017100  | 2.81422600  |
| H | -0.10342700 | 1.40697200  | 2.60980000  |
| H | -0.00137900 | 2.97015500  | 3.42207300  |
| H | -1.54462400 | 2.07721500  | 3.38169400  |
| C | -3.84679000 | 5.21749400  | 0.16460700  |
| H | -4.43044100 | 5.14682400  | 1.08444000  |
| H | -3.69570700 | 6.27610800  | -0.06561500 |
| H | -4.43872100 | 4.78727100  | -0.65019600 |
| N | -0.26598100 | -0.84569200 | 0.34716300  |
| C | 0.16598600  | -1.02300200 | 1.63152700  |
| O | 1.23818400  | -0.62918900 | 2.06566800  |
| O | -0.67169100 | -1.78003000 | 2.36942800  |
| C | -0.21588100 | -2.05994500 | 3.68972200  |
| H | -1.00598300 | -2.64715200 | 4.15558000  |
| H | 0.71517300  | -2.62904900 | 3.65042100  |
| H | -0.04781700 | -1.13278500 | 4.24180200  |
| C | -3.57050400 | -4.65667500 | -0.90204700 |
| C | -2.41113700 | -4.37038000 | -1.61809000 |
| C | -1.69888000 | -3.19088400 | -1.37109600 |
| C | -2.16478700 | -2.33829300 | -0.38966600 |
| C | -3.32768900 | -2.63482500 | 0.32403300  |
| C | -4.05357800 | -3.79057400 | 0.08464900  |
| H | -4.11477200 | -5.57229300 | -1.11069300 |
| H | -2.05889700 | -5.06342400 | -2.37406100 |
| H | -0.79836500 | -2.94535000 | -1.92802600 |

|   |             |             |            |
|---|-------------|-------------|------------|
| H | -4.96125100 | -4.01505500 | 0.63491500 |
| C | -1.67422400 | -0.97402500 | 0.03584300 |
| C | -2.65354900 | -0.61995200 | 1.19104100 |
| O | -2.63442200 | 0.38742000  | 1.86670600 |
| N | -3.60535300 | -1.60653500 | 1.23468800 |
| C | -4.74297000 | -1.57285000 | 2.11955700 |
| H | -5.67435900 | -1.57342700 | 1.54454400 |
| H | -4.73466400 | -2.43546300 | 2.79341300 |
| H | -4.67298000 | -0.65313000 | 2.70069100 |

**IM5(RR)**

|   |             |             |             |
|---|-------------|-------------|-------------|
| C | 1.70801000  | 0.15640400  | 1.06927000  |
| C | 0.48332800  | 0.63816300  | 1.25104100  |
| C | -0.61915500 | -0.22148600 | 0.62965300  |
| H | 0.23938700  | 1.45574200  | 1.92033000  |
| O | -1.36914000 | -0.85030400 | 1.45719800  |
| C | 2.95604300  | 0.60705800  | 1.72598100  |
| C | 3.13882300  | 0.37357100  | 3.09206300  |
| C | 3.95933300  | 1.26111200  | 1.00170800  |
| C | 4.30298500  | 0.79859900  | 3.72728300  |
| C | 5.12074800  | 1.68488100  | 1.63975200  |
| H | 3.81624600  | 1.43927700  | -0.06068900 |
| C | 5.29383900  | 1.45586800  | 3.00348800  |
| H | 4.43677600  | 0.61319100  | 4.78842600  |
| H | 5.89500000  | 2.19153700  | 1.07096500  |
| H | 2.36220500  | -0.15403600 | 3.63845400  |

|   |             |             |             |
|---|-------------|-------------|-------------|
| H | 6.20143200  | 1.78610800  | 3.49920000  |
| C | -6.47976700 | 0.13533500  | 2.92320100  |
| C | -6.85179900 | -0.50726000 | 1.74446600  |
| C | -5.87044500 | -0.79797700 | 0.80140500  |
| C | -4.15691100 | 0.16850800  | 2.22924800  |
| C | -5.14386200 | 0.46376600  | 3.16651300  |
| H | -7.23504100 | 0.37231000  | 3.66631300  |
| H | -7.88911600 | -0.77569900 | 1.56553800  |
| H | -3.10108900 | 0.35587200  | 2.40543900  |
| H | -4.87201100 | 0.94277400  | 4.10181500  |
| C | -4.54517700 | -0.44477900 | 1.04276500  |
| C | -3.66076700 | -0.85362400 | -0.11229500 |
| C | -4.66167100 | -1.27400300 | -1.24448100 |
| H | -2.97512800 | -1.65414400 | 0.15637300  |
| C | -6.00327400 | -1.52059800 | -0.51690200 |
| H | -4.28486200 | -2.16108700 | -1.75417800 |
| H | -6.83328300 | -1.16880800 | -1.13753600 |
| H | -6.15349000 | -2.59319300 | -0.35067100 |
| N | -2.83395800 | 0.26970200  | -0.57382000 |
| O | -4.81006300 | -0.30931800 | -2.28343100 |
| C | -3.37548400 | 1.25528300  | -1.34641400 |
| C | -4.76068600 | 1.03562900  | -1.85628100 |
| H | -5.50578800 | 1.25015900  | -1.07725000 |
| H | -4.94854300 | 1.67253200  | -2.72112100 |
| N | -2.50961900 | 2.18862400  | -1.61519700 |

|   |             |             |             |
|---|-------------|-------------|-------------|
| C | -1.54845000 | 0.58919900  | -0.34627600 |
| N | -1.38007200 | 1.75721500  | -0.97426800 |
| C | -0.17220300 | 2.52667800  | -1.03017600 |
| C | 0.05570000  | 3.48450000  | -0.04008700 |
| C | 0.72344400  | 2.25475200  | -2.05970300 |
| C | 1.29198200  | 4.12178200  | -0.04853900 |
| C | 1.94544000  | 2.92830700  | -2.03217800 |
| C | 2.25582700  | 3.83606500  | -1.01900000 |
| H | 1.51456600  | 4.85145800  | 0.72616300  |
| H | 2.67550200  | 2.73077800  | -2.81431300 |
| C | -1.00536400 | 3.81415200  | 0.97533800  |
| H | -0.59801300 | 4.44136500  | 1.77007400  |
| H | -1.83120900 | 4.35244000  | 0.49954400  |
| H | -1.43106500 | 2.91457700  | 1.43094500  |
| C | 0.34910300  | 1.28007500  | -3.14547800 |
| H | 0.18003700  | 0.27954200  | -2.73064900 |
| H | -0.57652900 | 1.59487600  | -3.63647500 |
| H | 1.13574700  | 1.21431400  | -3.89986900 |
| C | 3.61215000  | 4.48674500  | -0.94950900 |
| H | 4.19168500  | 4.05298200  | -0.12688400 |
| H | 4.17319500  | 4.33959400  | -1.87485800 |
| H | 3.52795900  | 5.56071200  | -0.76362400 |
| N | 0.31231600  | -1.08180900 | -0.29782800 |
| C | -0.23762000 | -2.15299900 | -0.93079400 |
| O | -1.38177400 | -2.20329600 | -1.34814300 |



|   |             |             |             |
|---|-------------|-------------|-------------|
| O | 0.64627800  | -3.16011000 | -1.09771600 |
| C | 0.14024600  | -4.28511800 | -1.80746100 |
| H | 0.97194800  | -4.98417800 | -1.88330400 |
| H | -0.69228000 | -4.73621200 | -1.26399600 |
| H | -0.20361500 | -3.98871800 | -2.80065900 |
| C | 5.05201000  | -1.85952800 | -2.28151500 |
| C | 4.21996600  | -0.82055400 | -2.68429000 |
| C | 3.07907200  | -0.50176700 | -1.93718500 |
| C | 2.78777300  | -1.23073800 | -0.80329100 |
| C | 3.63829100  | -2.27045400 | -0.40847900 |
| C | 4.77426200  | -2.60306600 | -1.13087700 |
| H | 5.93484100  | -2.09961600 | -2.86557800 |
| H | 4.45600300  | -0.25376400 | -3.57887700 |
| H | 2.43584300  | 0.31894100  | -2.22766300 |
| H | 5.42484900  | -3.41157300 | -0.81449100 |
| C | 1.67249600  | -1.10198900 | 0.21219100  |
| C | 1.97407200  | -2.30362600 | 1.16831800  |
| O | 1.32514600  | -2.64849300 | 2.12370400  |
| N | 3.16601700  | -2.86723900 | 0.75781800  |
| C | 3.76731600  | -4.00238200 | 1.41070200  |
| H | 3.79125500  | -4.86960500 | 0.74189300  |
| H | 4.78775800  | -3.76798000 | 1.72955100  |
| H | 3.15470900  | -4.23265900 | 2.28278800  |

**IM5(RS)**

|   |            |            |            |
|---|------------|------------|------------|
| C | 1.78887900 | 0.11529200 | 0.89085800 |
|---|------------|------------|------------|

|   |             |             |             |
|---|-------------|-------------|-------------|
| C | 0.56152000  | 0.50832500  | 1.22013500  |
| C | -0.53244500 | -0.23449400 | 0.44723500  |
| H | 0.32007900  | 1.15633700  | 2.05581300  |
| O | -1.18124900 | -1.11859700 | 1.13971400  |
| C | 3.05619500  | 0.45973400  | 1.57098900  |
| C | 3.21525700  | 0.17651200  | 2.93057200  |
| C | 4.10160700  | 1.08235700  | 0.87632400  |
| C | 4.39424200  | 0.51364200  | 3.58891300  |
| C | 5.27935000  | 1.41670000  | 1.53797500  |
| H | 3.97314600  | 1.32254200  | -0.17615000 |
| C | 5.42877400  | 1.13413100  | 2.89416600  |
| H | 4.50719300  | 0.28563100  | 4.64412500  |
| H | 6.08150700  | 1.90553200  | 0.99267000  |
| H | 2.40865100  | -0.32415900 | 3.45800000  |
| H | 6.34901100  | 1.39530100  | 3.40715300  |
| C | -6.17277300 | -0.64174600 | 3.21465400  |
| C | -6.64379400 | -0.97308200 | 1.94641500  |
| C | -5.74584300 | -0.99758100 | 0.88292800  |
| C | -3.91677800 | -0.38945500 | 2.36414000  |
| C | -4.82032400 | -0.35907300 | 3.42310100  |
| H | -6.86238400 | -0.61209500 | 4.05258200  |
| H | -7.69315300 | -1.20669100 | 1.79065700  |
| H | -2.85015800 | -0.22650000 | 2.49429300  |
| H | -4.47067300 | -0.12333800 | 4.42324500  |
| C | -4.40437700 | -0.69295200 | 1.09714800  |

|   |             |             |             |
|---|-------------|-------------|-------------|
| C | -3.61779100 | -0.77453500 | -0.19005600 |
| C | -4.70619200 | -0.94323500 | -1.30987700 |
| H | -2.89514400 | -1.58910300 | -0.18352400 |
| C | -5.99272700 | -1.36317500 | -0.55975200 |
| H | -4.37275300 | -1.69293400 | -2.02763200 |
| H | -6.85953900 | -0.86278000 | -1.00280800 |
| H | -6.15625300 | -2.44194200 | -0.65945200 |
| N | -2.84598900 | 0.45208000  | -0.42250400 |
| O | -4.92654800 | 0.21970300  | -2.10078200 |
| C | -3.42956800 | 1.56681100  | -0.94997500 |
| C | -4.84719700 | 1.44171900  | -1.39676900 |
| H | -5.53530500 | 1.47002000  | -0.53966100 |
| H | -5.09615100 | 2.24710100  | -2.08814100 |
| N | -2.57105600 | 2.53382700  | -1.10313100 |
| C | -1.54782800 | 0.73042600  | -0.23245500 |
| N | -1.40531000 | 1.99166400  | -0.64199700 |
| C | -0.16357400 | 2.70879200  | -0.68697500 |
| C | 0.14590800  | 3.54286100  | 0.39470400  |
| C | 0.70196500  | 2.46449000  | -1.74729500 |
| C | 1.41679900  | 4.09646600  | 0.42564400  |
| C | 1.97546100  | 3.03842000  | -1.66203400 |
| C | 2.35110400  | 3.83277100  | -0.58439700 |
| H | 1.69842100  | 4.73133900  | 1.26235600  |
| H | 2.69136800  | 2.82590300  | -2.45110900 |
| C | -0.87043400 | 3.80621800  | 1.47373600  |

|   |             |             |             |
|---|-------------|-------------|-------------|
| H | -0.44095800 | 4.42224400  | 2.26555600  |
| H | -1.74374500 | 4.32397700  | 1.06534100  |
| H | -1.23338200 | 2.87526000  | 1.92340900  |
| C | 0.31171900  | 1.64281200  | -2.94652100 |
| H | -0.63416600 | 1.11457900  | -2.80910400 |
| H | 0.20798600  | 2.29578100  | -3.81918400 |
| H | 1.09458100  | 0.91039300  | -3.15013900 |
| C | 3.74349400  | 4.39879000  | -0.48288200 |
| H | 4.34503500  | 4.12680800  | -1.35304200 |
| H | 3.72159500  | 5.49020900  | -0.40840600 |
| H | 4.24445900  | 4.01491000  | 0.41192000  |
| N | 0.36159500  | -0.76632200 | -0.69345300 |
| C | -0.18148500 | -1.51158700 | -1.68454600 |
| O | -1.35789100 | -1.49208700 | -2.00986500 |
| O | 0.74953600  | -2.24836700 | -2.32928500 |
| C | 0.25160300  | -2.99489300 | -3.43496800 |
| H | 1.11412800  | -3.51025700 | -3.85485800 |
| H | -0.49967900 | -3.71371800 | -3.10218500 |
| H | -0.19673500 | -2.32892600 | -4.17516600 |
| C | 3.19601400  | -4.68105000 | 1.13347200  |
| C | 1.98064900  | -4.27109600 | 1.67592200  |
| C | 1.39953800  | -3.05635300 | 1.29087300  |
| C | 2.06591800  | -2.29370700 | 0.35337100  |
| C | 3.27598700  | -2.71487100 | -0.19500000 |
| C | 3.87037700  | -3.90800800 | 0.18105500  |

|   |            |             |             |
|---|------------|-------------|-------------|
| H | 3.63291000 | -5.62282500 | 1.45098000  |
| H | 1.48089600 | -4.89933900 | 2.40568100  |
| H | 0.44593700 | -2.70024900 | 1.67852100  |
| H | 4.81446800 | -4.23383900 | -0.24315300 |
| C | 1.71949400 | -0.93369000 | -0.21998200 |
| C | 2.82214500 | -0.74705000 | -1.29287700 |
| O | 2.93541900 | 0.16345200  | -2.09025700 |
| N | 3.71690100 | -1.77444600 | -1.13923400 |
| C | 4.91085100 | -1.90819800 | -1.93577900 |
| H | 5.79812100 | -1.92378600 | -1.29545000 |
| H | 4.87897700 | -2.82913800 | -2.52708500 |
| H | 4.95427300 | -1.04731800 | -2.60317300 |

**IM5(SR)**

|   |             |             |            |
|---|-------------|-------------|------------|
| C | -1.72069200 | -0.28717000 | 1.31549200 |
| C | -0.46078500 | -0.12468400 | 1.70966700 |
| C | 0.55504900  | -0.48941800 | 0.62542400 |
| H | -0.14242900 | 0.10204400  | 2.72180600 |
| O | 1.21340200  | -1.58603500 | 0.83042500 |
| C | -2.93940900 | -0.20146700 | 2.14738000 |
| C | -3.08707900 | -1.04969600 | 3.24858000 |
| C | -3.94402600 | 0.73062100  | 1.85785400 |
| C | -4.21902800 | -0.96828700 | 4.05275900 |
| C | -5.07336600 | 0.81043000  | 2.66773700 |
| H | -3.82229600 | 1.39655200  | 1.00664100 |
| C | -5.21393400 | -0.03816200 | 3.76337400 |

|   |             |             |             |
|---|-------------|-------------|-------------|
| H | -4.32680900 | -1.63563800 | 4.90195900  |
| H | -5.84543900 | 1.54032500  | 2.44460600  |
| H | -2.31107000 | -1.78137800 | 3.45307000  |
| H | -6.09815400 | 0.02440500  | 4.38985500  |
| C | 6.17157000  | -2.51606400 | -1.38219000 |
| C | 6.67467600  | -1.89829100 | -0.23995400 |
| C | 5.79083000  | -1.22843700 | 0.60138000  |
| C | 3.91399900  | -1.81803400 | -0.83043500 |
| C | 4.80523700  | -2.47922200 | -1.67158500 |
| H | 6.84873900  | -3.03805700 | -2.05151400 |
| H | 7.73562300  | -1.93916500 | -0.01026500 |
| H | 2.84535400  | -1.79003600 | -1.02129000 |
| H | 4.43141700  | -2.97576700 | -2.56128100 |
| C | 4.43412500  | -1.18449500 | 0.29324500  |
| C | 3.65901300  | -0.42260100 | 1.34085100  |
| C | 4.76253700  | 0.19329800  | 2.28193400  |
| H | 2.95937900  | -1.07395700 | 1.86432900  |
| C | 6.07863700  | -0.52939400 | 1.90536100  |
| H | 4.49356400  | 0.02246900  | 3.32531400  |
| H | 6.89373100  | 0.19970400  | 1.84545000  |
| H | 6.35271000  | -1.25144400 | 2.68207400  |
| N | 2.83902200  | 0.65099600  | 0.74613000  |
| O | 4.89334200  | 1.60518100  | 2.18902800  |
| C | 3.39078000  | 1.86517000  | 0.44584400  |
| C | 4.80032700  | 2.10365800  | 0.86924900  |

|   |             |            |             |
|---|-------------|------------|-------------|
| H | 5.50768600  | 1.60527600 | 0.19125200  |
| H | 5.01110100  | 3.17284600 | 0.89274200  |
| N | 2.50870200  | 2.68426400 | -0.04036400 |
| C | 1.53877200  | 0.70453100 | 0.39775700  |
| N | 1.35711700  | 1.94674800 | -0.06288600 |
| C | 0.14390400  | 2.59161900 | -0.50098000 |
| C | -0.01803800 | 2.80525100 | -1.87565000 |
| C | -0.75112400 | 3.07869700 | 0.45220200  |
| C | -1.17610900 | 3.45185900 | -2.28780400 |
| C | -1.89849400 | 3.71814200 | -0.01940200 |
| C | -2.14052300 | 3.88502900 | -1.37738300 |
| H | -1.33675500 | 3.61088900 | -3.35129700 |
| H | -2.62021100 | 4.09087500 | 0.70480700  |
| C | 1.05085700  | 2.41545900 | -2.86205200 |
| H | 1.91772200  | 3.07612600 | -2.75586300 |
| H | 1.39493500  | 1.38931700 | -2.71227300 |
| H | 0.67326400  | 2.51233100 | -3.88215900 |
| C | -0.51081500 | 3.01741600 | 1.93893700  |
| H | -1.31136200 | 2.46103600 | 2.43519100  |
| H | 0.43927200  | 2.54529600 | 2.19506500  |
| H | -0.50051700 | 4.03197200 | 2.34791100  |
| C | -3.44028600 | 4.46535100 | -1.86143200 |
| H | -3.86637800 | 5.16215800 | -1.13553900 |
| H | -3.31817000 | 4.98669100 | -2.81398900 |
| H | -4.15815900 | 3.65202900 | -2.01244900 |

|   |             |             |             |
|---|-------------|-------------|-------------|
| N | -0.40615800 | -0.48410800 | -0.56823600 |
| C | 0.05917500  | -0.82751600 | -1.79133200 |
| O | 1.22527700  | -0.74562600 | -2.14118400 |
| O | -0.93259100 | -1.22181000 | -2.61803300 |
| C | -0.51570300 | -1.49908000 | -3.95051100 |
| H | -0.09786100 | -0.60231500 | -4.41442000 |
| H | 0.23944500  | -2.28727500 | -3.95865900 |
| H | -1.41195600 | -1.82050000 | -4.47895400 |
| C | -3.43331100 | -4.66625400 | -0.39302900 |
| C | -2.18272300 | -4.58145000 | 0.21338500  |
| C | -1.53528800 | -3.34565900 | 0.34314700  |
| C | -2.17466600 | -2.22940700 | -0.15590700 |
| C | -3.42154500 | -2.32166500 | -0.77299600 |
| C | -4.07927000 | -3.53378500 | -0.90277800 |
| H | -3.92084200 | -5.63234700 | -0.48020900 |
| H | -1.70668100 | -5.48151800 | 0.58774000  |
| H | -0.54963200 | -3.23309400 | 0.79317700  |
| H | -5.05052500 | -3.60759400 | -1.38091000 |
| C | -1.75432000 | -0.77355100 | -0.13049200 |
| C | -2.86378700 | -0.09989900 | -0.97428700 |
| O | -2.92034300 | 1.06070100  | -1.31830000 |
| N | -3.82430000 | -1.05387200 | -1.21695600 |
| C | -5.02749700 | -0.78975200 | -1.96425100 |
| H | -5.04380500 | -1.37450700 | -2.89013800 |
| H | -5.91149500 | -1.03742700 | -1.36868000 |



|   |             |            |             |
|---|-------------|------------|-------------|
| H | -5.03278000 | 0.27363900 | -2.20506300 |
|---|-------------|------------|-------------|

**IM5(SS)**

|   |            |            |            |
|---|------------|------------|------------|
| C | 1.78880400 | 0.11522400 | 0.89101600 |
|---|------------|------------|------------|

|   |            |            |            |
|---|------------|------------|------------|
| C | 0.56143000 | 0.50827900 | 1.22020900 |
|---|------------|------------|------------|

|   |             |             |            |
|---|-------------|-------------|------------|
| C | -0.53248500 | -0.23449400 | 0.44717700 |
|---|-------------|-------------|------------|

|   |            |            |            |
|---|------------|------------|------------|
| H | 0.31996100 | 1.15625000 | 2.05591000 |
|---|------------|------------|------------|

|   |             |             |            |
|---|-------------|-------------|------------|
| O | -1.18127200 | -1.11869800 | 1.13954200 |
|---|-------------|-------------|------------|

|   |            |            |            |
|---|------------|------------|------------|
| C | 3.05609900 | 0.45963500 | 1.57121100 |
|---|------------|------------|------------|

|   |            |            |            |
|---|------------|------------|------------|
| C | 3.21515200 | 0.17624700 | 2.93075800 |
|---|------------|------------|------------|

|   |            |            |            |
|---|------------|------------|------------|
| C | 4.10150300 | 1.08238400 | 0.87664100 |
|---|------------|------------|------------|

|   |            |            |            |
|---|------------|------------|------------|
| C | 4.39411800 | 0.51332800 | 3.58916100 |
|---|------------|------------|------------|

|   |            |            |            |
|---|------------|------------|------------|
| C | 5.27922000 | 1.41668400 | 1.53835400 |
|---|------------|------------|------------|

|   |            |            |             |
|---|------------|------------|-------------|
| H | 3.97305000 | 1.32269900 | -0.17580300 |
|---|------------|------------|-------------|

|   |            |            |            |
|---|------------|------------|------------|
| C | 5.42863800 | 1.13394000 | 2.89450900 |
|---|------------|------------|------------|

|   |            |            |            |
|---|------------|------------|------------|
| H | 4.50705800 | 0.28518400 | 4.64434400 |
|---|------------|------------|------------|

|   |            |            |            |
|---|------------|------------|------------|
| H | 6.08136800 | 1.90561400 | 0.99312500 |
|---|------------|------------|------------|

|   |            |             |            |
|---|------------|-------------|------------|
| H | 2.40855200 | -0.32450700 | 3.45811500 |
|---|------------|-------------|------------|

|   |            |            |            |
|---|------------|------------|------------|
| H | 6.34886100 | 1.39507900 | 3.40753600 |
|---|------------|------------|------------|

|   |             |             |            |
|---|-------------|-------------|------------|
| C | -6.17254000 | -0.64205100 | 3.21482600 |
|---|-------------|-------------|------------|

|   |             |             |            |
|---|-------------|-------------|------------|
| C | -6.64367300 | -0.97321600 | 1.94658500 |
|---|-------------|-------------|------------|

|   |             |             |            |
|---|-------------|-------------|------------|
| C | -5.74581100 | -0.99760700 | 0.88302000 |
|---|-------------|-------------|------------|

|   |             |             |            |
|---|-------------|-------------|------------|
| C | -3.91661400 | -0.38970000 | 2.36415000 |
|---|-------------|-------------|------------|

|   |             |             |            |
|---|-------------|-------------|------------|
| C | -4.82007100 | -0.35942100 | 3.42318900 |
|---|-------------|-------------|------------|

|   |             |             |            |
|---|-------------|-------------|------------|
| H | -6.86208100 | -0.61250500 | 4.05281400 |
|---|-------------|-------------|------------|

|   |             |             |            |
|---|-------------|-------------|------------|
| H | -7.69304900 | -1.20678500 | 1.79088400 |
|---|-------------|-------------|------------|

|   |             |             |             |
|---|-------------|-------------|-------------|
| H | -2.84997900 | -0.22679100 | 2.49423500  |
| H | -4.47032600 | -0.12380700 | 4.42332900  |
| C | -4.40432100 | -0.69304300 | 1.09716100  |
| C | -3.61783400 | -0.77451400 | -0.19011500 |
| C | -4.70632700 | -0.94312300 | -1.30986800 |
| H | -2.89518400 | -1.58907600 | -0.18371600 |
| C | -5.99283600 | -1.36303100 | -0.55967900 |
| H | -4.37298100 | -1.69283100 | -2.02765900 |
| H | -6.85964300 | -0.86251900 | -1.00261300 |
| H | -6.15646000 | -2.44177200 | -0.65947600 |
| N | -2.84603100 | 0.45212000  | -0.42251500 |
| O | -4.92669000 | 0.21984100  | -2.10074500 |
| C | -3.42956400 | 1.56685600  | -0.95001400 |
| C | -4.84722400 | 1.44184700  | -1.39671900 |
| H | -5.53527000 | 1.47016300  | -0.53956200 |
| H | -5.09618300 | 2.24725700  | -2.08805700 |
| N | -2.57100400 | 2.53382000  | -1.10324400 |
| C | -1.54785200 | 0.73041500  | -0.23251700 |
| N | -1.40527100 | 1.99160600  | -0.64214100 |
| C | -0.16354600 | 2.70875100  | -0.68704500 |
| C | 0.14577100  | 3.54290800  | 0.39461200  |
| C | 0.70211800  | 2.46436600  | -1.74724200 |
| C | 1.41663900  | 4.09657100  | 0.42563900  |
| C | 1.97557700  | 3.03836300  | -1.66188900 |
| C | 2.35108200  | 3.83277500  | -0.58424200 |

|   |             |             |             |
|---|-------------|-------------|-------------|
| H | 1.69815000  | 4.73152800  | 1.26232400  |
| H | 2.69159600  | 2.82576500  | -2.45084100 |
| C | -0.87065900 | 3.80628100  | 1.47355700  |
| H | -0.44123700 | 4.42231800  | 2.26540000  |
| H | -1.74394400 | 4.32402800  | 1.06509900  |
| H | -1.23363600 | 2.87533600  | 1.92323300  |
| C | 0.31207900  | 1.64228500  | -2.94626400 |
| H | -0.63360800 | 1.11372600  | -2.80853100 |
| H | 0.20797400  | 2.29497800  | -3.81908600 |
| H | 1.09515000  | 0.91006400  | -3.14978000 |
| C | 3.74346600  | 4.39878900  | -0.48259900 |
| H | 4.34531400  | 4.12615200  | -1.35234500 |
| H | 3.72160600  | 5.49026000  | -0.40892500 |
| H | 4.24411000  | 4.01552900  | 0.41265100  |
| N | 0.36164000  | -0.76617800 | -0.69352200 |
| C | -0.18137800 | -1.51130500 | -1.68474700 |
| O | -1.35776500 | -1.49176900 | -2.01013000 |
| O | 0.74971000  | -2.24789600 | -2.32959600 |
| C | 0.25187700  | -2.99414600 | -3.43550700 |
| H | 1.11437800  | -3.50967000 | -3.85524200 |
| H | -0.49967100 | -3.71280900 | -3.10299900 |
| H | -0.19610200 | -2.32797600 | -4.17574900 |
| C | 3.19580300  | -4.68130600 | 1.13298000  |
| C | 1.98039400  | -4.27142900 | 1.67539200  |
| C | 1.39935500  | -3.05659100 | 1.29053400  |

|   |            |             |             |
|---|------------|-------------|-------------|
| C | 2.06584400 | -2.29377100 | 0.35325000  |
| C | 3.27594700 | -2.71487100 | -0.19509800 |
| C | 3.87027600 | -3.90809000 | 0.18078300  |
| H | 3.63265000 | -5.62315200 | 1.45034300  |
| H | 1.48054800 | -4.89981400 | 2.40496300  |
| H | 0.44573200 | -2.70053200 | 1.67816500  |
| H | 4.81440200 | -4.23385800 | -0.24339400 |
| C | 1.71948900 | -0.93365500 | -0.21993800 |
| C | 2.82222700 | -0.74687400 | -1.29268600 |
| O | 2.93556700 | 0.16376100  | -2.08990300 |
| N | 3.71696800 | -1.77429700 | -1.13914000 |
| C | 4.91094600 | -1.90794600 | -1.93566600 |
| H | 5.79822700 | -1.92330900 | -1.29534500 |
| H | 4.87921600 | -2.82895700 | -2.52686600 |
| H | 4.95421300 | -1.04713800 | -2.60316400 |

**TS6(RR)**

|   |             |             |            |
|---|-------------|-------------|------------|
| C | 1.69609200  | -0.00497200 | 1.21364500 |
| C | 0.46263900  | 0.35391500  | 1.55475100 |
| C | -0.58965800 | -0.55600800 | 0.97770400 |
| H | 0.20127200  | 1.14555800  | 2.24519400 |
| O | -1.50435900 | -1.03970100 | 1.65326600 |
| C | 2.96614400  | 0.55861800  | 1.72009700 |
| C | 3.23199500  | 0.49845000  | 3.09198200 |
| C | 3.90598400  | 1.14919800  | 0.86581400 |
| C | 4.41223800  | 1.02768700  | 3.60580600 |

|   |             |             |             |
|---|-------------|-------------|-------------|
| C | 5.08586700  | 1.67472900  | 1.38453800  |
| H | 3.70247600  | 1.20720700  | -0.19976800 |
| C | 5.34125400  | 1.61719400  | 2.75310500  |
| H | 4.60821800  | 0.97288600  | 4.67189700  |
| H | 5.81018800  | 2.12792300  | 0.71411000  |
| H | 2.50924700  | 0.01584200  | 3.74324700  |
| H | 6.26415400  | 2.02630200  | 3.15198500  |
| C | -6.59249200 | 0.32459100  | 2.79448300  |
| C | -6.93979100 | -0.34771900 | 1.62470600  |
| C | -5.93696600 | -0.68016500 | 0.71909200  |
| C | -4.25318000 | 0.30729200  | 2.16272300  |
| C | -5.25985100 | 0.64377500  | 3.06449900  |
| H | -7.36484100 | 0.59605300  | 3.50756400  |
| H | -7.97584200 | -0.60474900 | 1.42289400  |
| H | -3.20414000 | 0.49839000  | 2.36956500  |
| H | -5.00704400 | 1.15089200  | 3.99017700  |
| C | -4.61286500 | -0.34023700 | 0.98617500  |
| C | -3.70309400 | -0.79072400 | -0.13444700 |
| C | -4.68347900 | -1.20870100 | -1.28451100 |
| H | -3.06313400 | -1.61922300 | 0.16473200  |
| C | -6.04467800 | -1.43006500 | -0.58618100 |
| H | -4.31184300 | -2.10857300 | -1.77633000 |
| H | -6.85656100 | -1.08398500 | -1.23331900 |
| H | -6.20698600 | -2.49784500 | -0.40091400 |
| N | -2.82864900 | 0.29516300  | -0.58815100 |

|   |             |             |             |
|---|-------------|-------------|-------------|
| O | -4.79156100 | -0.25090800 | -2.33355700 |
| C | -3.33984000 | 1.29240600  | -1.37517600 |
| C | -4.71659300 | 1.09846600  | -1.91703700 |
| H | -5.47758400 | 1.33737200  | -1.16074800 |
| H | -4.87032200 | 1.72899100  | -2.79337500 |
| N | -2.45155300 | 2.20588000  | -1.62347200 |
| C | -1.53223200 | 0.57084300  | -0.31400200 |
| N | -1.34845200 | 1.74221900  | -0.94557200 |
| C | -0.13352900 | 2.49928000  | -0.95996000 |
| C | 0.21713300  | 3.24392900  | 0.17088500  |
| C | 0.66022600  | 2.45158100  | -2.10576000 |
| C | 1.46667800  | 3.85675800  | 0.17218600  |
| C | 1.89806900  | 3.09455700  | -2.06347300 |
| C | 2.32595700  | 3.77765200  | -0.92611100 |
| H | 1.77990200  | 4.41100700  | 1.05412800  |
| H | 2.54608100  | 3.04702500  | -2.93573800 |
| C | -0.73961600 | 3.43881400  | 1.31851700  |
| H | -0.19747400 | 3.67415900  | 2.23732600  |
| H | -1.41111800 | 4.27580800  | 1.10038300  |
| H | -1.36391700 | 2.56101100  | 1.49774300  |
| C | 0.17516600  | 1.74248100  | -3.34347800 |
| H | -0.23528800 | 0.75518400  | -3.10779900 |
| H | -0.62772900 | 2.31478100  | -3.81743600 |
| H | 0.98655200  | 1.62000200  | -4.06467300 |
| C | 3.68158900  | 4.43157500  | -0.87150800 |

|   |             |             |             |
|---|-------------|-------------|-------------|
| H | 4.22408200  | 4.11008000  | 0.02272900  |
| H | 4.28139400  | 4.17629900  | -1.74794500 |
| H | 3.58997900  | 5.52134700  | -0.82896000 |
| N | 0.24611800  | -1.41116500 | 0.08206500  |
| C | -0.27930100 | -2.47389600 | -0.58650800 |
| O | -1.44214100 | -2.60108000 | -0.91153600 |
| O | 0.67851600  | -3.37693700 | -0.89350600 |
| C | 0.21814900  | -4.49114200 | -1.65139100 |
| H | 1.10001800  | -5.09987900 | -1.84549000 |
| H | -0.52388800 | -5.05691200 | -1.08466800 |
| H | -0.23053600 | -4.15652600 | -2.58898800 |
| C | 4.63069500  | -1.48400100 | -2.69694700 |
| C | 3.57093100  | -0.61747600 | -2.94710900 |
| C | 2.53400000  | -0.48869800 | -2.01516500 |
| C | 2.58413800  | -1.22817500 | -0.85447700 |
| C | 3.64539400  | -2.10811600 | -0.62020600 |
| C | 4.68466000  | -2.24920500 | -1.52702900 |
| H | 5.43140900  | -1.57603400 | -3.42393600 |
| H | 3.54741900  | -0.04129700 | -3.86641300 |
| H | 1.70345000  | 0.18547800  | -2.18162700 |
| H | 5.50843400  | -2.92975100 | -1.33937000 |
| C | 1.66178800  | -1.25533900 | 0.33903500  |
| C | 2.27491700  | -2.40973700 | 1.19299200  |
| O | 1.82554100  | -2.86034000 | 2.21756600  |
| N | 3.46476100  | -2.76993300 | 0.59508600  |

|   |            |             |            |
|---|------------|-------------|------------|
| C | 4.32770700 | -3.80393300 | 1.11047400 |
| H | 4.39575200 | -4.63914300 | 0.40530000 |
| H | 5.33123100 | -3.41001700 | 1.29810600 |
| H | 3.88998900 | -4.15196500 | 2.04648000 |

**TS6(RS)**

|   |             |             |             |
|---|-------------|-------------|-------------|
| C | 1.76256700  | 0.08627800  | 0.91963100  |
| C | 0.51730500  | 0.27295000  | 1.35725400  |
| C | -0.43238200 | -0.71187400 | 0.74586900  |
| H | 0.19901900  | 0.97894000  | 2.11462600  |
| O | -1.30104800 | -1.33207500 | 1.34543100  |
| C | 2.99329500  | 0.74675200  | 1.40095300  |
| C | 3.23198700  | 0.81762500  | 2.77746900  |
| C | 3.92626000  | 1.30713800  | 0.51865000  |
| C | 4.37542500  | 1.43901200  | 3.26762000  |
| C | 5.07144300  | 1.92350200  | 1.01331100  |
| H | 3.73257700  | 1.29782400  | -0.55008700 |
| C | 5.29996300  | 1.99179200  | 2.38564000  |
| H | 4.54886200  | 1.48286100  | 4.33803900  |
| H | 5.78456400  | 2.36122300  | 0.32123100  |
| H | 2.51763700  | 0.36400600  | 3.45813200  |
| H | 6.19642200  | 2.47139000  | 2.76567600  |
| C | -6.30328900 | -0.60355900 | 3.12277600  |
| C | -6.74439100 | -1.04171100 | 1.87569400  |
| C | -5.84117700 | -1.07439400 | 0.81801100  |
| C | -4.06783300 | -0.25316600 | 2.25625400  |



|   |             |             |             |
|---|-------------|-------------|-------------|
| C | -4.97552300 | -0.21557700 | 3.31220600  |
| H | -6.99803200 | -0.56532700 | 3.95609200  |
| H | -7.77716900 | -1.34610700 | 1.73139100  |
| H | -3.02271800 | 0.00888100  | 2.38966000  |
| H | -4.64743700 | 0.11364700  | 4.29301700  |
| C | -4.51998000 | -0.67747200 | 1.01218100  |
| C | -3.72998200 | -0.78931000 | -0.27490700 |
| C | -4.82913300 | -0.98623500 | -1.37347500 |
| H | -3.03028500 | -1.62705200 | -0.25601700 |
| C | -6.05994700 | -1.51840600 | -0.60779900 |
| H | -4.47775900 | -1.68375600 | -2.13562500 |
| H | -6.97845000 | -1.13131300 | -1.05840800 |
| H | -6.09893300 | -2.61240000 | -0.66662800 |
| N | -2.95323800 | 0.41207600  | -0.55380100 |
| O | -5.14425700 | 0.20104200  | -2.09628500 |
| C | -3.57337900 | 1.54400700  | -1.01181100 |
| C | -5.01336300 | 1.41822900  | -1.38267900 |
| H | -5.65420000 | 1.43915800  | -0.49028500 |
| H | -5.30670100 | 2.22570600  | -2.05413800 |
| N | -2.72693400 | 2.51746000  | -1.16392600 |
| C | -1.62820600 | 0.65140900  | -0.40075500 |
| N | -1.54097600 | 1.93803000  | -0.76818200 |
| C | -0.31180400 | 2.66995800  | -0.78515100 |
| C | -0.00504700 | 3.48981200  | 0.30309200  |
| C | 0.56295700  | 2.45448300  | -1.84753600 |

|   |             |             |             |
|---|-------------|-------------|-------------|
| C | 1.24908100  | 4.09234900  | 0.32066600  |
| C | 1.80932000  | 3.07805400  | -1.78660400 |
| C | 2.16715300  | 3.89294700  | -0.71350500 |
| H | 1.52240800  | 4.72226400  | 1.16412800  |
| H | 2.51967000  | 2.90399400  | -2.59131100 |
| C | -1.00730300 | 3.69465600  | 1.40714400  |
| H | -0.56412900 | 4.24643500  | 2.23836900  |
| H | -1.87600700 | 4.25102600  | 1.04212400  |
| H | -1.38320000 | 2.73705100  | 1.78339200  |
| C | 0.15178700  | 1.58257800  | -3.00186300 |
| H | 0.00507300  | 0.55281900  | -2.66467500 |
| H | -0.78848100 | 1.93999100  | -3.43333200 |
| H | 0.92440900  | 1.57233500  | -3.77091900 |
| C | 3.51578500  | 4.56358000  | -0.66982000 |
| H | 3.92553700  | 4.55294200  | 0.34376600  |
| H | 4.22711500  | 4.06033300  | -1.33033800 |
| H | 3.44328500  | 5.60765700  | -0.99242900 |
| N | 0.38603200  | -1.31824100 | -0.30295900 |
| C | -0.11556700 | -2.17784400 | -1.23307700 |
| O | -1.28919200 | -2.33131700 | -1.49345300 |
| O | 0.88507200  | -2.82269500 | -1.87140300 |
| C | 0.45664000  | -3.68026300 | -2.92579600 |
| H | 1.36528300  | -4.12006400 | -3.33374200 |
| H | -0.20702600 | -4.45586000 | -2.53928000 |
| H | -0.07135000 | -3.10915400 | -3.69211600 |

|   |            |             |             |
|---|------------|-------------|-------------|
| C | 4.24079300 | -4.25806400 | 1.39078200  |
| C | 3.06898500 | -4.01982500 | 2.10388400  |
| C | 2.19333700 | -3.00341300 | 1.70518500  |
| C | 2.52034200 | -2.26210700 | 0.59001100  |
| C | 3.69017900 | -2.51189400 | -0.12477100 |
| C | 4.57506400 | -3.50689100 | 0.25795700  |
| H | 4.91285800 | -5.04584600 | 1.71583800  |
| H | 2.83463900 | -4.62408800 | 2.97334400  |
| H | 1.26737700 | -2.80173400 | 2.23873800  |
| H | 5.48761000 | -3.70123800 | -0.29567800 |
| C | 1.79504800 | -1.09767000 | -0.05135500 |
| C | 2.65712000 | -0.83591300 | -1.31349600 |
| O | 2.44071500 | -0.03372400 | -2.19562400 |
| N | 3.76668700 | -1.64129300 | -1.22086800 |
| C | 4.82104800 | -1.64863700 | -2.20429900 |
| H | 5.77906000 | -1.39360500 | -1.74037100 |
| H | 4.90161300 | -2.63334200 | -2.67605900 |
| H | 4.56805900 | -0.90299300 | -2.95853900 |

**TS6(SR)**

|   |             |             |            |
|---|-------------|-------------|------------|
| C | -1.67334600 | -0.52667800 | 1.39675700 |
| C | -0.39870300 | -0.64599800 | 1.76223100 |
| C | 0.46545900  | -1.09026400 | 0.61646000 |
| H | 0.01021100  | -0.49299200 | 2.75391400 |
| O | 1.31464100  | -1.97633500 | 0.67262500 |
| C | -2.83415400 | -0.14911200 | 2.23019900 |

|   |             |             |             |
|---|-------------|-------------|-------------|
| C | -3.21744600 | -0.94734000 | 3.31097100  |
| C | -3.54636000 | 1.02481400  | 1.95258500  |
| C | -4.29853300 | -0.57896200 | 4.10630600  |
| C | -4.62429200 | 1.38934600  | 2.75275700  |
| H | -3.23818300 | 1.65263500  | 1.11966100  |
| C | -5.00340300 | 0.58891500  | 3.82805600  |
| H | -4.59184700 | -1.20607500 | 4.94204900  |
| H | -5.16726400 | 2.30440900  | 2.53804600  |
| H | -2.66828400 | -1.86226800 | 3.51260000  |
| H | -5.84663700 | 0.87552100  | 4.44838500  |
| C | 6.29286200  | -2.42372100 | -1.46965700 |
| C | 6.74904600  | -1.95586300 | -0.23894200 |
| C | 5.84198800  | -1.34411500 | 0.62121200  |
| C | 4.03608100  | -1.68534700 | -0.97219200 |
| C | 4.95025200  | -2.29144700 | -1.83117700 |
| H | 6.99004900  | -2.89570200 | -2.15533200 |
| H | 7.79381500  | -2.06089400 | 0.03955200  |
| H | 2.98560600  | -1.58588400 | -1.23349600 |
| H | 4.61218900  | -2.66566300 | -2.79214900 |
| C | 4.50772900  | -1.21243300 | 0.24719700  |
| C | 3.70596000  | -0.51388800 | 1.32236100  |
| C | 4.79160500  | 0.02742100  | 2.32211800  |
| H | 3.01648800  | -1.20625000 | 1.80614700  |
| C | 6.07458500  | -0.77381200 | 1.99815200  |
| H | 4.46835700  | -0.12684700 | 3.35327100  |

|   |             |             |             |
|---|-------------|-------------|-------------|
| H | 6.94677400  | -0.11576300 | 2.06358900  |
| H | 6.21711400  | -1.57543200 | 2.73156500  |
| N | 2.90875100  | 0.58614500  | 0.77684100  |
| O | 5.01021100  | 1.42843800  | 2.23476800  |
| C | 3.51160800  | 1.78146100  | 0.48897100  |
| C | 4.92637100  | 1.96232900  | 0.92531600  |
| H | 5.62116600  | 1.46103900  | 0.23669400  |
| H | 5.17465600  | 3.02241900  | 0.98069900  |
| N | 2.66708900  | 2.62340500  | -0.01857900 |
| C | 1.59871600  | 0.64546000  | 0.41767300  |
| N | 1.49664100  | 1.89546100  | -0.05653900 |
| C | 0.32158400  | 2.55699100  | -0.54994600 |
| C | 0.18492700  | 2.71424100  | -1.93034200 |
| C | -0.56573700 | 3.12222800  | 0.36847500  |
| C | -0.91374200 | 3.43610900  | -2.38916500 |
| C | -1.64763200 | 3.83698700  | -0.14030900 |
| C | -1.84383600 | 3.98926500  | -1.51153500 |
| H | -1.04810600 | 3.56464800  | -3.46081900 |
| H | -2.35413300 | 4.28577900  | 0.55529100  |
| C | 1.21729700  | 2.15758300  | -2.87403000 |
| H | 2.17420800  | 2.67186100  | -2.73902700 |
| H | 1.39106600  | 1.09198100  | -2.69483200 |
| H | 0.89915400  | 2.29224100  | -3.91028000 |
| C | -0.34373300 | 2.98870500  | 1.85133500  |
| H | -0.53065000 | 1.96273200  | 2.18338600  |

|   |             |             |             |
|---|-------------|-------------|-------------|
| H | 0.68676000  | 3.24267200  | 2.11836200  |
| H | -1.01752800 | 3.64977500  | 2.40023700  |
| C | -3.06938500 | 4.68827700  | -2.03544900 |
| H | -2.88264900 | 5.15339500  | -3.00646300 |
| H | -3.88009900 | 3.96258200  | -2.16366400 |
| H | -3.41873400 | 5.45941200  | -1.34423500 |
| N | -0.46017900 | -0.98009800 | -0.51791400 |
| C | -0.08336200 | -1.18092100 | -1.80883600 |
| O | 1.05713700  | -1.17302700 | -2.22278400 |
| O | -1.16376600 | -1.35287900 | -2.60046900 |
| C | -0.86882800 | -1.44194600 | -3.99135400 |
| H | -0.39769900 | -0.52004300 | -4.34035100 |
| H | -0.19882600 | -2.28106300 | -4.18646400 |
| H | -1.82760200 | -1.59143500 | -4.48525900 |
| C | -4.35300200 | -4.35678800 | -0.39685300 |
| C | -3.10830200 | -4.57604900 | 0.18748500  |
| C | -2.20131300 | -3.51975300 | 0.33622400  |
| C | -2.57242500 | -2.27308900 | -0.12101200 |
| C | -3.81666500 | -2.06292800 | -0.71527700 |
| C | -4.73245300 | -3.09248200 | -0.86183900 |
| H | -5.04818200 | -5.18398500 | -0.49931000 |
| H | -2.84113200 | -5.56996500 | 0.52924000  |
| H | -1.21953700 | -3.66335300 | 0.78197700  |
| H | -5.70200800 | -2.93045100 | -1.32111500 |
| C | -1.83295800 | -0.95240000 | -0.06425500 |

|   |             |             |             |
|---|-------------|-------------|-------------|
| C | -2.77049000 | -0.02193900 | -0.87193100 |
| O | -2.55936000 | 1.12474100  | -1.19212300 |
| N | -3.92853400 | -0.72569100 | -1.11542800 |
| C | -5.05172800 | -0.17002900 | -1.82735100 |
| H | -5.22557900 | -0.71414600 | -2.76166000 |
| H | -5.95559700 | -0.21329400 | -1.21213100 |
| H | -4.81005200 | 0.86938800  | -2.05121100 |

**TS6(SS)**

|   |             |             |             |
|---|-------------|-------------|-------------|
| C | 1.77593300  | -1.16811800 | 0.51990600  |
| C | 0.62855200  | -1.77818600 | 0.22786600  |
| C | -0.09068100 | -1.10693700 | -0.91618100 |
| H | 0.26751200  | -2.71334600 | 0.64100800  |
| O | -0.48634000 | -1.71706400 | -1.90230000 |
| C | 2.84183400  | -1.62812800 | 1.43584600  |
| C | 3.32543500  | -0.81641500 | 2.46972700  |
| C | 3.38271000  | -2.90665200 | 1.26468600  |
| C | 4.32981100  | -1.28181900 | 3.31252100  |
| C | 4.38669600  | -3.36822600 | 2.10936300  |
| H | 3.01629400  | -3.52619900 | 0.45169900  |
| C | 4.86417100  | -2.55545700 | 3.13393000  |
| H | 4.68992800  | -0.64971900 | 4.11805200  |
| H | 4.80019400  | -4.36084700 | 1.96305800  |
| H | 2.89058300  | 0.16506300  | 2.63293600  |
| H | 5.64870500  | -2.91375000 | 3.79263400  |
| C | -3.38439600 | 5.36354600  | -0.90670900 |

|   |             |             |             |
|---|-------------|-------------|-------------|
| C | -2.72284100 | 5.44089300  | 0.31886400  |
| C | -2.07879500 | 4.30925900  | 0.80535600  |
| C | -2.75217500 | 3.03531500  | -1.15230700 |
| C | -3.40206400 | 4.17241100  | -1.63322000 |
| H | -3.89942700 | 6.23661600  | -1.29501800 |
| H | -2.72395400 | 6.36530600  | 0.88906400  |
| H | -2.74413400 | 2.10753700  | -1.71553800 |
| H | -3.92844000 | 4.12810400  | -2.58106200 |
| C | -2.09014400 | 3.12554900  | 0.06633700  |
| C | -1.31726800 | 2.05048100  | 0.80624300  |
| C | -1.25783400 | 2.58843200  | 2.26595800  |
| H | -0.29749700 | 1.94271500  | 0.43708600  |
| C | -1.31536700 | 4.11764700  | 2.09514400  |
| H | -0.34016400 | 2.25445700  | 2.75235000  |
| H | -1.78521800 | 4.58440100  | 2.96457800  |
| H | -0.29675400 | 4.51392000  | 2.00427600  |
| N | -1.96082700 | 0.74978200  | 0.77709100  |
| O | -2.32417900 | 2.11523700  | 3.08871500  |
| C | -3.10317900 | 0.56145800  | 1.51046000  |
| C | -3.50005000 | 1.66357800  | 2.43743200  |
| H | -4.00259200 | 2.47210700  | 1.89055200  |
| H | -4.17030400 | 1.28203300  | 3.20820100  |
| N | -3.57538700 | -0.63438500 | 1.34032900  |
| C | -1.66596900 | -0.38826000 | 0.10181400  |
| N | -2.67586600 | -1.19367500 | 0.45968300  |



|   |             |             |             |
|---|-------------|-------------|-------------|
| C | -2.88136600 | -2.53787300 | 0.00500000  |
| C | -3.29532100 | -2.73655600 | -1.31498400 |
| C | -2.67316300 | -3.58137000 | 0.90656600  |
| C | -3.48702800 | -4.05216400 | -1.72729200 |
| C | -2.87630800 | -4.88132600 | 0.44348000  |
| C | -3.27669300 | -5.13227500 | -0.86779400 |
| H | -3.80714900 | -4.23888000 | -2.74951600 |
| H | -2.71903300 | -5.71382900 | 1.12503200  |
| C | -3.51869200 | -1.57077100 | -2.23895000 |
| H | -4.16990100 | -0.82394400 | -1.77269400 |
| H | -2.56022600 | -1.09768600 | -2.47944200 |
| H | -3.98856300 | -1.90598900 | -3.16561900 |
| C | -2.26514700 | -3.30643600 | 2.33032600  |
| H | -1.44257200 | -2.58541800 | 2.37811500  |
| H | -3.09745900 | -2.87637700 | 2.89486100  |
| H | -1.94815200 | -4.22679100 | 2.82437900  |
| C | -3.46270000 | -6.54384500 | -1.36240300 |
| H | -2.61405800 | -6.85177100 | -1.98154200 |
| H | -3.54418900 | -7.24867100 | -0.53203200 |
| H | -4.36355000 | -6.63095400 | -1.97548600 |
| N | 0.69086900  | 0.15207100  | -1.04320800 |
| C | 0.31320100  | 1.13846100  | -1.89714700 |
| O | -0.75179200 | 1.19537400  | -2.47248200 |
| O | 1.25769000  | 2.10719700  | -1.96497100 |
| C | 0.87277100  | 3.23994900  | -2.74290600 |

|             |             |             |             |
|-------------|-------------|-------------|-------------|
| H           | 0.67676700  | 2.94371500  | -3.77483400 |
| H           | -0.02797200 | 3.69856000  | -2.32698600 |
| H           | 1.71436600  | 3.92908100  | -2.69477300 |
| C           | 5.58770900  | -0.15281800 | -2.60395100 |
| C           | 4.59346300  | -1.05513100 | -2.97351200 |
| C           | 3.36074100  | -1.06302900 | -2.30968200 |
| C           | 3.16450100  | -0.15063500 | -1.29493500 |
| C           | 4.15956700  | 0.75789800  | -0.93985900 |
| C           | 5.38888500  | 0.77684300  | -1.57651900 |
| H           | 6.53955100  | -0.16419800 | -3.12500200 |
| H           | 4.77689900  | -1.75628300 | -3.78017700 |
| H           | 2.56195200  | -1.74930400 | -2.58099700 |
| H           | 6.16518900  | 1.48174400  | -1.29834600 |
| C           | 1.97249600  | 0.05393100  | -0.38667300 |
| C           | 2.39504100  | 1.30822900  | 0.41990500  |
| O           | 1.72922500  | 1.90317600  | 1.24865400  |
| N           | 3.69130700  | 1.59079800  | 0.09064200  |
| C           | 4.44761200  | 2.66428300  | 0.68766700  |
| H           | 5.34340000  | 2.27134600  | 1.17805300  |
| H           | 4.74344000  | 3.39473300  | -0.07168400 |
| H           | 3.80534700  | 3.14460100  | 1.42586700  |
| <b>P(R)</b> |             |             |             |
| C           | 0.68592500  | -1.47453500 | 0.06198200  |
| C           | 0.16590600  | -2.66183600 | 0.38031000  |
| C           | -1.31553000 | -2.58430800 | 0.43943100  |

|   |             |             |             |
|---|-------------|-------------|-------------|
| H | 0.69669200  | -3.58861200 | 0.55126000  |
| O | -2.10475700 | -3.45786300 | 0.67206600  |
| C | 2.10912900  | -1.10667600 | -0.07953700 |
| C | 2.60571000  | -0.58251600 | -1.27914300 |
| C | 2.97601100  | -1.29065700 | 1.00145900  |
| C | 3.95115000  | -0.24734400 | -1.38653400 |
| C | 4.31949600  | -0.94886200 | 0.88988900  |
| H | 2.58351900  | -1.68976900 | 1.93194500  |
| C | 4.80839500  | -0.42427000 | -0.30333700 |
| H | 4.33286400  | 0.14497300  | -2.32359400 |
| H | 4.98413400  | -1.09003200 | 1.73594500  |
| H | 1.94743100  | -0.47863500 | -2.13649600 |
| H | 5.85685100  | -0.15826900 | -0.39086300 |
| N | -1.61931500 | -1.22612900 | 0.15882900  |
| C | -2.90829400 | -0.72565800 | 0.02245200  |
| O | -3.92565500 | -1.33395000 | 0.20611000  |
| O | -2.84246200 | 0.56947100  | -0.34897200 |
| C | -4.11453400 | 1.18994500  | -0.53365200 |
| H | -3.90001000 | 2.22248100  | -0.80366000 |
| H | -4.66781000 | 0.68792400  | -1.32921400 |
| H | -4.69531600 | 1.14493900  | 0.38922600  |
| C | 0.37063900  | 3.14654900  | 2.06828000  |
| C | 0.10762500  | 2.02359300  | 2.84720000  |
| C | -0.17473400 | 0.79393700  | 2.24098400  |
| C | -0.19697200 | 0.73033000  | 0.86368300  |

|   |             |             |             |
|---|-------------|-------------|-------------|
| C | 0.06493400  | 1.86345900  | 0.09013300  |
| C | 0.35513100  | 3.08687900  | 0.67087700  |
| H | 0.59219800  | 4.09221100  | 2.55232200  |
| H | 0.12376900  | 2.10149300  | 3.92855600  |
| H | -0.38197700 | -0.09197600 | 2.83522700  |
| H | 0.56131900  | 3.96541400  | 0.06889400  |
| C | -0.42424700 | -0.43839700 | -0.06737600 |
| C | -0.39070200 | 0.23968000  | -1.46703100 |
| O | -0.58898400 | -0.30371600 | -2.52792200 |
| N | -0.02879400 | 1.54970900  | -1.27104600 |
| C | 0.12440200  | 2.49483200  | -2.35058300 |
| H | -0.59779500 | 3.31156600  | -2.25302800 |
| H | 1.13762100  | 2.90824400  | -2.35708800 |
| H | -0.05850400 | 1.95658400  | -3.28108200 |

**P(S)**

|   |             |             |             |
|---|-------------|-------------|-------------|
| C | -0.68605000 | -1.47448300 | 0.06192800  |
| C | -0.16611100 | -2.66180500 | 0.38029900  |
| C | 1.31533000  | -2.58437600 | 0.43940600  |
| H | -0.69695500 | -3.58854600 | 0.55126100  |
| O | 2.10449900  | -3.45798100 | 0.67205000  |
| C | -2.10923700 | -1.10655900 | -0.07959700 |
| C | -2.60575500 | -0.58221500 | -1.27914600 |
| C | -2.97618300 | -1.29071500 | 1.00131700  |
| C | -3.95118200 | -0.24699400 | -1.38654900 |
| C | -4.31965700 | -0.94887300 | 0.88973600  |

|   |             |             |             |
|---|-------------|-------------|-------------|
| H | -2.58375900 | -1.69000500 | 1.93175600  |
| C | -4.80848600 | -0.42406700 | -0.30342100 |
| H | -4.33283200 | 0.14549000  | -2.32356900 |
| H | -4.98432800 | -1.09017900 | 1.73574000  |
| H | -1.94745500 | -0.47824200 | -2.13647000 |
| H | -5.85692900 | -0.15801600 | -0.39095200 |
| N | 1.61920600  | -1.22622000 | 0.15878300  |
| C | 2.90823100  | -0.72586300 | 0.02238200  |
| O | 3.92553700  | -1.33427000 | 0.20596100  |
| O | 2.84251200  | 0.56929800  | -0.34893900 |
| C | 4.11462800  | 1.18968100  | -0.53361100 |
| H | 4.69552000  | 1.14437500  | 0.38918200  |
| H | 4.66775000  | 0.68780600  | -1.32937300 |
| H | 3.90017900  | 2.22231000  | -0.80332600 |
| C | -0.37035100 | 3.14653000  | 2.06842200  |
| C | -0.10749700 | 2.02350100  | 2.84729000  |
| C | 0.17472400  | 0.79383900  | 2.24101900  |
| C | 0.19699000  | 0.73029600  | 0.86371500  |
| C | -0.06475600 | 1.86350000  | 0.09022200  |
| C | -0.35481700 | 3.08692600  | 0.67101700  |
| H | -0.59180000 | 4.09219400  | 2.55250700  |
| H | -0.12365400 | 2.10134700  | 3.92865000  |
| H | 0.38185700  | -0.09212400 | 2.83522700  |
| H | -0.56088600 | 3.96551500  | 0.06907200  |
| C | 0.42418300  | -0.43840400 | -0.06740400 |

|   |             |             |             |
|---|-------------|-------------|-------------|
| C | 0.39070600  | 0.23975100  | -1.46702500 |
| O | 0.58892100  | -0.30361400 | -2.52794500 |
| N | 0.02897600  | 1.54981800  | -1.27097100 |
| C | -0.12400400 | 2.49504800  | -2.35044600 |
| H | -1.13715400 | 2.90863300  | -2.35698100 |
| H | 0.59832100  | 3.31165500  | -2.25278300 |
| H | 0.05886500  | 1.95684500  | -3.28097700 |
